# Supplementary material for: Seven key hub genes identified by gene co-expression network in cutaneous squamous cell carcinoma
Source: BMC Cancer. 2021 Jul 23;21:852. doi: 10.1186/s12885-021-08604-y (PMC8306372; doi:10.1186/s12885-021-08604-y)
Supplement: Supplementary file 1 — Additional file 1: Supplementary Table 1. Genes in the module 5 for cSCC in the GSE45216–98774 dataset. Supplementary Table 2. Genes in the module 23 for AK in the GSE45216–98774 dataset. Supplementary Table 3. Genes in the module 9 for normal sample in the GSE45216–98774 dataset. Supplementary Table 4. Genes in the module 5 for cSCC in the GSE108008 dataset. Supplementary Table 5. Genes in the module 10 for AK in the GSE108008 dataset. Supplementary Table 6. Genes in the module 7 for normal sample in the GSE108008 dataset. Supplementary Table 7. Overrepresented GO terms in the module 5 relevant for cSCC in the GSE45216–98774 dataset. Supplementary Table 8. KEGG functional enrichment of genes in the module 5 relevant for cSCC in the GSE45216–98774 dataset. Supplementary Table 9. KEGG functional enrichment of genes in the module 23 relevant for AK in the GSE45216–98774 dataset. Supplementary Table 10. Overrepresented GO terms in the module 9 relevant for normal tissue in the GSE45216–98774 dataset. Supplementary Table 11. KEGG functional enrichment of genes in the module 9 relevant for normal tissue in the GSE45216–98774 dataset. Supplementary Table 12. Overrepresented GO terms in the module 5 relevant for cSCC in the GSE108008 dataset. Supplementary Table 13. KEGG functional enrichment of genes in the module 5 relevant for cSCC in the GSE108008 dataset. Supplementary Table 14. Overrepresented GO terms in the module 10 relevant for AK in the GSE108008 dataset. Supplementary Table 15. KEGG functional enrichment of genes in the module 10 relevant for AK in the GSE108008 dataset. Supplementary Table 16. Overrepresented GO terms in the module 7 relevant for normal tissue in the GSE108008 dataset. Supplementary Table 17. KEGG functional enrichment of genes in the module 7 relevant for normal tissue in the GSE108008 dataset. Supplementary Table 18. Differentially expressed genes when cSCC compared with AK samples in dataset GSE45216–98774. Supplementary Table 19. Different [file 12885_2021_8604_MOESM1_ESM.xlsx]

## Sheet: Supplementary Table 1
Supplementary Table 1. Genes in the module 5 for cSCC in the GSE45216-98774 dataset
geneSymbol	moduleColor	GS.cSCC	p.GS.cSCC	MM.lightcyan	p.MM.lightcyan
TNFRSF19	lightcyan	-0.841087	7.29303e-24	-0.850614	6.86956e-25
FAM13C	lightcyan	-0.835246	2.87811e-23	-0.80563	1.4469e-20
HN1	lightcyan	0.830068	9.30129e-23	0.839032	1.18953e-23
EDNRB	lightcyan	-0.827797	1.53659e-22	-0.709692	2.88317e-14
MMP10	lightcyan	0.823158	4.19016e-22	0.84579	2.31753e-24
SH2D5	lightcyan	0.818701	1.06909e-21	0.836009	2.41305e-23
PLP1	lightcyan	-0.815987	1.86743e-21	-0.751211	1.22182e-16
ERO1L	lightcyan	0.814535	2.50759e-21	0.804051	1.9557e-20
JOSD1	lightcyan	0.80594	1.36337e-20	0.799136	4.91183e-20
ID4	lightcyan	-0.802687	2.53191e-20	-0.76625	1.28542e-17
PTHLH	lightcyan	0.799529	4.5674e-20	0.89441	9.63425e-31
LONRF1	lightcyan	-0.798229	5.80459e-20	-0.869656	3.58489e-27
QPCT	lightcyan	-0.796075	8.60471e-20	-0.758406	4.24622e-17
LYAR	lightcyan	0.795777	9.08325e-20	0.789036	3.01507e-19
SLC16A14	lightcyan	-0.791147	2.08032e-19	-0.820308	7.64862e-22
UPP1	lightcyan	0.784622	6.46155e-19	0.864359	1.67441e-26
ACVR2A	lightcyan	-0.780494	1.29698e-18	-0.852445	4.28095e-25
CTSLP8	lightcyan	0.780392	1.31943e-18	0.763101	2.08823e-17
RHOT1	lightcyan	-0.780203	1.3616e-18	-0.867466	6.83482e-27
DEGS1	lightcyan	-0.778686	1.75181e-18	-0.893167	1.52554e-30
CXCL1	lightcyan	0.77759	2.0989e-18	0.786344	4.80943e-19
GPR68	lightcyan	0.774737	3.34395e-18	0.793449	1.38148e-19
CDH3	lightcyan	0.771353	5.76006e-18	0.868605	4.89303e-27
SERPINE1	lightcyan	0.770723	6.36735e-18	0.816893	1.55196e-21
FAM8A1	lightcyan	-0.767799	1.0096e-17	-0.804109	1.9345e-20
SERPINB1	lightcyan	0.766252	1.28499e-17	0.757574	4.80763e-17
MMP1	lightcyan	0.76366	1.91716e-17	0.856696	1.39293e-25
CTD-2325A15.5	lightcyan	-0.762005	2.46813e-17	-0.664868	3.9432e-12
MOAP1	lightcyan	-0.761573	2.63546e-17	-0.759059	3.85091e-17
AR	lightcyan	-0.761231	2.77576e-17	-0.792152	1.74089e-19
HLF	lightcyan	-0.757805	4.64467e-17	-0.807642	9.81504e-21
PPP6C	lightcyan	-0.757658	4.74749e-17	-0.783932	7.26712e-19
SHC1	lightcyan	0.757088	5.16739e-17	0.827562	1.61791e-22
ARHGEF26	lightcyan	-0.752856	9.62561e-17	-0.904138	2.13585e-32
CXCL8	lightcyan	0.751954	1.0973e-16	0.744149	3.33116e-16
VAMP2	lightcyan	-0.750472	1.35918e-16	-0.772977	4.44213e-18
CHP2	lightcyan	-0.74962	1.53597e-16	-0.908978	2.74948e-33
SPATA18	lightcyan	-0.748506	1.80124e-16	-0.788561	3.27534e-19
MGST2	lightcyan	-0.748133	1.89936e-16	-0.851867	4.974e-25
TYMP	lightcyan	0.747703	2.01928e-16	0.831038	7.48853e-23
LINC00938	lightcyan	-0.745221	2.86686e-16	-0.798569	5.45303e-20
PIK3C2G	lightcyan	-0.744142	3.33433e-16	-0.818266	1.16986e-21
GATM	lightcyan	-0.744138	3.33617e-16	-0.908202	3.84906e-33
CCSAP	lightcyan	-0.743607	3.59266e-16	-0.802895	2.43415e-20
ANKLE2	lightcyan	0.741458	4.84028e-16	0.744743	3.06533e-16
MYEF2	lightcyan	-0.740176	5.77386e-16	-0.732567	1.61058e-15
TRAM1L1	lightcyan	-0.740087	5.84414e-16	-0.625459	1.55957e-10
KIT	lightcyan	-0.739676	6.18274e-16	-0.65853	7.39112e-12
PRPF4	lightcyan	0.737622	8.17894e-16	0.690194	2.73063e-13
ACBD5	lightcyan	-0.734743	1.20548e-15	-0.762501	2.28863e-17
INHBA	lightcyan	0.733849	1.35834e-15	0.876816	3.99601e-28
METTL7A	lightcyan	-0.73249	1.62713e-15	-0.775768	2.82834e-18
ACTN1	lightcyan	0.729994	2.26079e-15	0.769213	8.08615e-18
DENR	lightcyan	0.729587	2.3843e-15	0.699851	9.17201e-14
CDCP1	lightcyan	0.729572	2.38922e-15	0.677649	1.05928e-12
FBXW7	lightcyan	-0.728967	2.58567e-15	-0.754428	7.65174e-17
ALDH1A3	lightcyan	0.72872	2.67015e-15	0.647567	2.11674e-11
IL4R	lightcyan	0.728462	2.7613e-15	0.817413	1.39466e-21
MIPEP	lightcyan	-0.726223	3.68999e-15	-0.755869	6.18927e-17
SLC16A10	lightcyan	-0.725622	3.98709e-15	-0.81243	3.82651e-21
VAV2	lightcyan	0.72546	4.07104e-15	0.7767	2.42907e-18
NOLC1	lightcyan	0.725293	4.15879e-15	0.751197	1.22435e-16
RAB31	lightcyan	0.722473	5.9594e-15	0.878584	2.2762e-28
ACOX1	lightcyan	-0.720623	7.5278e-15	-0.776232	2.62193e-18
CTSB	lightcyan	0.717791	1.07243e-14	0.749124	1.64907e-16
MBTD1	lightcyan	-0.713705	1.7738e-14	-0.828411	1.34248e-22
FAM167A	lightcyan	-0.71251	2.05162e-14	-0.624857	1.64304e-10
ANXA1	lightcyan	0.71205	2.16935e-14	0.75271	9.83266e-17
MYH9	lightcyan	0.712042	2.17138e-14	0.82509	2.76903e-22
PLAU	lightcyan	0.710156	2.72668e-14	0.81546	2.07913e-21
P2RY14	lightcyan	-0.709884	2.81754e-14	-0.617803	3.00371e-10
LOC101928784	lightcyan	-0.709502	2.94972e-14	-0.776284	2.59998e-18
ALDH3A2	lightcyan	-0.7083	3.40557e-14	-0.829161	1.13769e-22
SEPP1	lightcyan	-0.706379	4.27933e-14	-0.661457	5.54009e-12
GPRC5A	lightcyan	0.706373	4.28221e-14	0.701669	7.43289e-14
ETS2	lightcyan	0.705186	4.92679e-14	0.610834	5.37228e-10
NRIP1	lightcyan	0.704855	5.12253e-14	0.798699	5.3237e-20
UFC1	lightcyan	-0.703596	5.93736e-14	-0.832172	5.80257e-23
BRIX1	lightcyan	0.70339	6.08223e-14	0.660636	6.0084e-12
MARK3	lightcyan	0.702759	6.54729e-14	0.752656	9.91011e-17
PKM	lightcyan	0.702352	6.86563e-14	0.788517	3.30076e-19
SLC9A1	lightcyan	0.701158	7.88591e-14	0.633823	7.46456e-11
PPP1R18	lightcyan	0.701137	7.90577e-14	0.752308	1.04247e-16
SOCS3	lightcyan	0.701085	7.95298e-14	0.760966	2.88946e-17
FTSJ1	lightcyan	0.701055	7.98117e-14	0.780123	1.37997e-18
OLFM2	lightcyan	-0.699561	9.48358e-14	-0.604608	8.92561e-10
PIAS1	lightcyan	-0.699058	1.00475e-13	-0.709425	2.97695e-14
FSCN1	lightcyan	0.699028	1.00823e-13	0.801914	2.92781e-20
SEC13	lightcyan	0.698253	1.10195e-13	0.651166	1.50553e-11
XPR1	lightcyan	0.69779	1.16185e-13	0.758368	4.27044e-17
C1QTNF9B-AS1	lightcyan	-0.694394	1.70796e-13	-0.736497	9.52261e-16
CCDC109B	lightcyan	0.693373	1.9157e-13	0.718084	1.03406e-14
LRP4	lightcyan	-0.692634	2.08116e-13	-0.726695	3.47233e-15
SRSF8	lightcyan	-0.692615	2.08564e-13	-0.597295	1.59795e-09
ATL1	lightcyan	-0.691703	2.30911e-13	-0.697247	1.23616e-13
TM4SF1	lightcyan	0.69016	2.74083e-13	0.705798	4.5837e-14
GLDN	lightcyan	-0.689739	2.87183e-13	-0.667945	2.89054e-12
STX17	lightcyan	-0.687517	3.66756e-13	-0.706436	4.25061e-14
CACNB4	lightcyan	-0.687412	3.70978e-13	-0.637696	5.26638e-11
NAP1L2	lightcyan	-0.687362	3.73034e-13	-0.683908	5.43156e-13
FMNL2	lightcyan	0.686869	3.93718e-13	0.879447	1.72399e-28
CLCA4	lightcyan	-0.686108	4.27815e-13	-0.7199	8.24298e-15
TRIO	lightcyan	0.68478	4.94259e-13	0.737579	8.22668e-16
EMB	lightcyan	-0.68432	5.1949e-13	-0.679642	8.57844e-13
FLOT2	lightcyan	0.682396	6.39261e-13	0.714785	1.55412e-14
ITGA3	lightcyan	0.68142	7.0972e-13	0.705955	4.49901e-14
ETHE1	lightcyan	0.680866	7.5304e-13	0.644302	2.87198e-11
SGK223	lightcyan	0.680188	8.09439e-13	0.620034	2.48604e-10
SETD7	lightcyan	-0.679274	8.92033e-13	-0.638845	4.7446e-11
ILF2	lightcyan	0.677645	1.05974e-12	0.661528	5.50118e-12
VMP1	lightcyan	0.67705	1.12823e-12	0.7934	1.39367e-19
DCT	lightcyan	-0.676899	1.14628e-12	-0.730314	2.16796e-15
DCBLD1	lightcyan	0.676402	1.20767e-12	0.817367	1.4078e-21
TYRP1	lightcyan	-0.675655	1.30605e-12	-0.705806	4.57926e-14
LPCAT1	lightcyan	0.674087	1.53794e-12	0.828784	1.23654e-22
CCNJL	lightcyan	0.673574	1.62209e-12	0.761486	2.67067e-17
NME7	lightcyan	0.673551	1.62603e-12	0.772887	4.50745e-18
TMPRSS11D	lightcyan	0.673518	1.63157e-12	0.679442	8.76264e-13
LOC102723721	lightcyan	0.672627	1.7892e-12	0.692062	2.21852e-13
LANCL1	lightcyan	-0.671546	2.00034e-12	-0.685749	4.44889e-13
MMP3	lightcyan	0.671385	2.03371e-12	0.746745	2.3128e-16
STON2	lightcyan	0.671161	2.08114e-12	0.787435	3.98376e-19
APCDD1	lightcyan	-0.670293	2.2751e-12	-0.635746	6.28165e-11
ABCD3	lightcyan	-0.670267	2.28114e-12	-0.822878	4.44778e-22
NAA30	lightcyan	-0.669856	2.37921e-12	-0.6354	6.4802e-11
RERG	lightcyan	-0.669589	2.44489e-12	-0.578859	6.51482e-09
SATB1	lightcyan	-0.669346	2.50642e-12	-0.637503	5.35953e-11
GATA3	lightcyan	-0.668959	2.60717e-12	-0.839531	1.05694e-23
PTGFRN	lightcyan	0.668197	2.81755e-12	0.743974	3.41356e-16
MLANA	lightcyan	-0.667568	3.00322e-12	-0.733478	1.42705e-15
PLOD2	lightcyan	0.666375	3.38836e-12	0.673438	1.6452e-12
DFNA5	lightcyan	0.665639	3.64908e-12	0.838434	1.36963e-23
SFT2D1	lightcyan	0.665577	3.67226e-12	0.606835	7.45291e-10
PPIB	lightcyan	0.665144	3.83553e-12	0.777186	2.24303e-18
NAV1	lightcyan	0.665131	3.84053e-12	0.801464	3.18542e-20
PALMD	lightcyan	-0.664697	4.01144e-12	-0.667501	3.02355e-12
PARM1	lightcyan	-0.664478	4.10057e-12	-0.535702	1.27077e-07
WDR77	lightcyan	0.664201	4.21562e-12	0.599368	1.35675e-09
DYNLT1	lightcyan	0.664086	4.26454e-12	0.730325	2.16472e-15
B4GALT1	lightcyan	0.66365	4.45454e-12	0.700692	8.32317e-14
ADSL	lightcyan	0.66352	4.5126e-12	0.706645	4.14659e-14
B3GNT1	lightcyan	-0.663337	4.59608e-12	-0.643989	2.95675e-11
ESYT1	lightcyan	0.663107	4.70254e-12	0.755775	6.27625e-17
ARL4A	lightcyan	-0.662634	4.92914e-12	-0.783946	7.24986e-19
TES	lightcyan	0.661413	5.56438e-12	0.718175	1.02243e-14
XRCC4	lightcyan	0.659808	6.51956e-12	0.73694	8.97088e-16
AC007362.3	lightcyan	0.659311	6.84648e-12	0.806545	1.21344e-20
ANKRD35	lightcyan	-0.658899	7.12871e-12	-0.768198	9.48502e-18
PMEL	lightcyan	-0.656873	8.68979e-12	-0.662599	4.94654e-12
PML	lightcyan	0.656398	9.10062e-12	0.762213	2.39116e-17
ERG	lightcyan	0.6554	1.00255e-11	0.751936	1.10024e-16
OXCT1	lightcyan	-0.654625	1.08057e-11	-0.638077	5.08756e-11
HIF1A	lightcyan	0.652212	1.36252e-11	0.821732	5.6695e-22
HSDL2	lightcyan	-0.652048	1.38401e-11	-0.757783	4.65975e-17
HUS1	lightcyan	0.651398	1.47263e-11	0.70179	7.3286e-14
NRIP3	lightcyan	0.649853	1.70571e-11	0.656247	9.23465e-12
NRP2	lightcyan	0.649561	1.75369e-11	0.823539	3.86271e-22
RETSAT	lightcyan	-0.649215	1.81207e-11	-0.611974	4.88984e-10
MYOM3	lightcyan	0.649161	1.82132e-11	0.630761	9.80084e-11
P2RX7	lightcyan	-0.648468	1.94442e-11	-0.622154	2.07418e-10
USP30	lightcyan	-0.64821	1.99245e-11	-0.680287	8.00959e-13
JAG1	lightcyan	0.647895	2.05246e-11	0.674261	1.51046e-12
KAT7	lightcyan	-0.647572	2.1158e-11	-0.654457	1.09818e-11
TMEM19	lightcyan	-0.64747	2.13613e-11	-0.644521	2.81421e-11
VEGFA	lightcyan	0.647408	2.14862e-11	0.617647	3.04339e-10
ADAM9	lightcyan	0.647283	2.17403e-11	0.704619	5.26644e-14
MYO10	lightcyan	0.646403	2.36102e-11	0.729201	2.50775e-15
FCER1A	lightcyan	-0.645997	2.45241e-11	-0.665847	3.57372e-12
SUGCT	lightcyan	0.645521	2.56387e-11	0.802231	2.75877e-20
NRG1	lightcyan	0.645486	2.57226e-11	0.680269	8.02505e-13
SPRY1	lightcyan	-0.644906	2.71505e-11	-0.591487	2.51174e-09
SPRR2C	lightcyan	0.642983	3.24547e-11	0.662612	4.94021e-12
FMN1	lightcyan	-0.642093	3.52341e-11	-0.645367	2.60086e-11
SUMO3	lightcyan	0.640618	4.03502e-11	0.643675	3.04422e-11
UTP14A	lightcyan	0.639393	4.51303e-11	0.639538	4.45388e-11
ACAP2	lightcyan	-0.638435	4.92465e-11	-0.64549	2.57123e-11
TUBB6	lightcyan	0.638216	5.02394e-11	0.702879	6.45609e-14
PFKP	lightcyan	0.637894	5.17278e-11	0.651371	1.47648e-11
ALDH1A1	lightcyan	-0.637261	5.47845e-11	-0.559957	2.52121e-08
NUP37	lightcyan	0.637179	5.51928e-11	0.612221	4.79063e-10
POLR2H	lightcyan	0.636594	5.81875e-11	0.675195	1.37029e-12
C1orf74	lightcyan	0.636587	5.82265e-11	0.638595	4.85349e-11
MEGF9	lightcyan	-0.635978	6.15158e-11	-0.680121	8.15258e-13
KLF8	lightcyan	-0.634406	7.08494e-11	-0.808718	7.96172e-21
CYP2R1	lightcyan	-0.63413	7.26257e-11	-0.705203	4.91668e-14
NDRG2	lightcyan	-0.634101	7.28131e-11	-0.673539	1.628e-12
CALU	lightcyan	0.63393	7.39344e-11	0.817014	1.51393e-21
PSMG1	lightcyan	0.633622	7.5999e-11	0.720437	7.70506e-15
SLC16A1	lightcyan	0.633543	7.65352e-11	0.770628	6.46423e-18
CYP27B1	lightcyan	0.632876	8.12311e-11	0.778941	1.67932e-18
LYRM5	lightcyan	-0.630323	1.01874e-10	-0.723066	5.52706e-15
POU2F3	lightcyan	-0.62963	1.08301e-10	-0.847396	1.55336e-24
PTPN12	lightcyan	0.629154	1.12931e-10	0.712031	2.1743e-14
TCN1	lightcyan	0.628574	1.18836e-10	0.637278	5.46972e-11
TUBB4A	lightcyan	-0.628327	1.21441e-10	-0.691712	2.30676e-13
B3GNT5	lightcyan	0.627272	1.33182e-10	0.673481	1.6379e-12
MGC16275	lightcyan	-0.626656	1.40542e-10	-0.615841	3.54302e-10
CRYAB	lightcyan	-0.626207	1.46142e-10	-0.643868	2.99022e-11
CCNYL1	lightcyan	0.625922	1.49813e-10	0.752948	9.49877e-17
EPB41L4A-AS1	lightcyan	-0.625869	1.50497e-10	-0.675691	1.30112e-12
NDUFS1	lightcyan	-0.625818	1.51169e-10	-0.674815	1.42579e-12
CCDC186	lightcyan	-0.625721	1.52445e-10	-0.722861	5.67324e-15
DSCR3	lightcyan	0.625631	1.53643e-10	0.565312	1.73312e-08
TRIM63	lightcyan	-0.624017	1.76695e-10	-0.590897	2.62858e-09
FAM65A	lightcyan	0.623658	1.82251e-10	0.669708	2.41526e-12
TGFA	lightcyan	0.623099	1.91234e-10	0.610448	5.54618e-10
RPS6KA6	lightcyan	-0.621925	2.11526e-10	-0.721607	6.64944e-15
RALB	lightcyan	0.62166	2.1638e-10	0.77739	2.16904e-18
RALA	lightcyan	0.621327	2.22623e-10	0.692089	2.21174e-13
AGA	lightcyan	-0.620962	2.29679e-10	-0.613302	4.37981e-10
PIK3CD	lightcyan	0.620892	2.3106e-10	0.734134	1.30765e-15
VEGFC	lightcyan	0.62072	2.34476e-10	0.698068	1.12549e-13
SULF2	lightcyan	0.620106	2.47073e-10	0.756524	5.61816e-17
NEBL	lightcyan	-0.619828	2.53001e-10	-0.766486	1.23916e-17
CMYA5	lightcyan	-0.61972	2.5534e-10	-0.699701	9.33124e-14
SNCA	lightcyan	-0.617745	3.01834e-10	-0.626361	1.44188e-10
REEP5	lightcyan	-0.617352	3.12013e-10	-0.593025	2.23031e-09
ZHX1	lightcyan	-0.617044	3.20214e-10	-0.64405	2.94005e-11
UBE2Q2	lightcyan	0.617015	3.21015e-10	0.687734	3.58137e-13
ABL2	lightcyan	0.61663	3.31581e-10	0.714998	1.51413e-14
EMP2	lightcyan	-0.614981	3.8076e-10	-0.82711	1.78621e-22
RAP2B	lightcyan	0.61486	3.84616e-10	0.673824	1.58052e-12
HRH1	lightcyan	0.614024	4.12423e-10	0.66656	3.32555e-12
FGD4	lightcyan	-0.613633	4.26071e-10	-0.647756	2.07944e-11
CCDC3	lightcyan	-0.613155	4.43352e-10	-0.572159	1.06284e-08
PPP2CA	lightcyan	-0.612713	4.59949e-10	-0.697317	1.2263e-13
PSMD2	lightcyan	0.612645	4.62529e-10	0.702907	6.43543e-14
ANXA3	lightcyan	0.611489	5.08997e-10	0.766117	1.31233e-17
ALG1	lightcyan	0.611341	5.15237e-10	0.597273	1.6007e-09
CD1A	lightcyan	-0.610884	5.35049e-10	-0.611183	5.21994e-10
PXDN	lightcyan	0.610431	5.5536e-10	0.783832	7.39144e-19
OXR1	lightcyan	-0.60942	6.03477e-10	-0.711784	2.2405e-14
MCEE	lightcyan	-0.608964	6.26459e-10	-0.717073	1.17237e-14
ITPR2	lightcyan	-0.608528	6.49199e-10	-0.62493	1.63276e-10
PPP4R4	lightcyan	0.607929	6.81745e-10	0.67017	2.30393e-12
NDFIP2	lightcyan	-0.607699	6.9467e-10	-0.654607	1.08238e-11
CAPN2	lightcyan	0.607565	7.02271e-10	0.739408	6.41374e-16
GSTA3	lightcyan	-0.607315	7.16712e-10	-0.77982	1.45131e-18
SRGAP1	lightcyan	0.606956	7.37962e-10	0.677822	1.04017e-12
GLCCI1	lightcyan	-0.606432	7.70089e-10	-0.771447	5.67449e-18
MPP7	lightcyan	-0.605835	8.08257e-10	-0.701169	7.87588e-14
ARMC10	lightcyan	-0.605535	8.28132e-10	-0.73877	6.99779e-16
MAPKAPK5	lightcyan	0.605244	8.4787e-10	0.570924	1.1618e-08
AXIN2	lightcyan	-0.604956	8.67843e-10	-0.572839	1.01183e-08
SPAG16	lightcyan	-0.604907	8.71274e-10	-0.734526	1.24099e-15
LYPD6B	lightcyan	-0.604122	9.28188e-10	-0.669133	2.56145e-12
HDAC1	lightcyan	0.603729	9.58027e-10	0.669954	2.35546e-12
IWS1	lightcyan	0.603053	1.01141e-09	0.549705	5.07357e-08
PMEPA1	lightcyan	0.602966	1.01851e-09	0.816667	1.62549e-21
CDC42BPB	lightcyan	0.602156	1.08675e-09	0.557553	2.97673e-08
EMG1	lightcyan	0.601997	1.10067e-09	0.613108	4.45077e-10
THRB	lightcyan	-0.601872	1.11176e-09	-0.718367	9.98315e-15
PYGL	lightcyan	0.601537	1.1419e-09	0.679785	8.44926e-13
RPA3	lightcyan	0.601456	1.14926e-09	0.574833	8.75383e-09
COL4A2	lightcyan	0.601202	1.17278e-09	0.728498	2.74848e-15
PIGC	lightcyan	-0.600559	1.23439e-09	-0.625485	1.55605e-10
BOLA3	lightcyan	0.600257	1.26442e-09	0.593175	2.20439e-09
NOV	lightcyan	-0.600212	1.26894e-09	-0.566564	1.58624e-08
ZNF697	lightcyan	0.600141	1.27609e-09	0.669521	2.46188e-12
BEX4	lightcyan	-0.599587	1.33342e-09	-0.588777	3.09242e-09
SIRT1	lightcyan	-0.598663	1.43456e-09	-0.592431	2.33515e-09
NRG2	lightcyan	-0.598346	1.47101e-09	-0.456899	1.1054e-05
RB1CC1	lightcyan	-0.598343	1.47133e-09	-0.563235	2.00583e-08
SLC20A1	lightcyan	0.598268	1.48004e-09	0.711481	2.32404e-14
ZNF711	lightcyan	-0.598049	1.5059e-09	-0.688017	3.47166e-13
ARCN1	lightcyan	0.597937	1.5192e-09	0.617362	3.11767e-10
HINT3	lightcyan	-0.597871	1.52711e-09	-0.705596	4.69412e-14
TPD52	lightcyan	-0.597684	1.54986e-09	-0.715898	1.35542e-14
HOPX	lightcyan	-0.597112	1.62115e-09	-0.702756	6.54975e-14
GABARAPL1	lightcyan	-0.596853	1.65452e-09	-0.50556	8.01115e-07
NDRG1	lightcyan	0.596647	1.68147e-09	0.700366	8.64242e-14
OSMR	lightcyan	0.595982	1.77146e-09	0.745756	2.65889e-16
COBL	lightcyan	-0.59549	1.84089e-09	-0.75662	5.53915e-17
GPN2	lightcyan	0.595281	1.87119e-09	0.518317	3.75558e-07
BBIP1	lightcyan	-0.594886	1.92985e-09	-0.55821	2.84507e-08
MB21D1	lightcyan	0.594597	1.9737e-09	0.714353	1.63873e-14
MPZL1	lightcyan	0.594393	2.00538e-09	0.794148	1.21873e-19
THEM5	lightcyan	-0.593053	2.22537e-09	-0.611141	5.23808e-10
MSH3	lightcyan	-0.592395	2.34181e-09	-0.611214	5.20652e-10
CNGB1	lightcyan	0.592253	2.36761e-09	0.722277	6.10932e-15
IL1B	lightcyan	0.591741	2.46315e-09	0.606888	7.42077e-10
MFAP2	lightcyan	0.591205	2.56699e-09	0.701106	7.93436e-14
CCDC115	lightcyan	-0.590666	2.67577e-09	-0.651649	1.43783e-11
RNF19B	lightcyan	0.590408	2.72919e-09	0.60376	9.55623e-10
CHL1	lightcyan	-0.590216	2.76978e-09	-0.599767	1.31455e-09
IPO9-AS1	lightcyan	0.589799	2.85984e-09	0.652992	1.26446e-11
DENND1A	lightcyan	0.589643	2.89431e-09	0.676821	1.15577e-12
PHLDA1	lightcyan	0.589562	2.91234e-09	0.789497	2.7812e-19
LOC340340	lightcyan	0.589464	2.93415e-09	0.682397	6.39187e-13
STXBP6	lightcyan	-0.589401	2.94837e-09	-0.72809	2.89842e-15
DNAJB5	lightcyan	0.588576	3.14022e-09	0.658254	7.59354e-12
PDPN	lightcyan	0.588003	3.28063e-09	0.722193	6.17444e-15
TYR	lightcyan	-0.586646	3.63705e-09	-0.563291	1.99802e-08
AJAP1	lightcyan	0.58616	3.7735e-09	0.705668	4.65409e-14
KIAA0232	lightcyan	-0.586043	3.80699e-09	-0.573869	9.38957e-09
SYNPO	lightcyan	0.585735	3.89682e-09	0.767634	1.03614e-17
TTC39C	lightcyan	-0.58452	4.27093e-09	-0.694676	1.65449e-13
FLNB	lightcyan	0.584443	4.29595e-09	0.620575	2.37398e-10
FLOT1	lightcyan	0.584153	4.39069e-09	0.657819	7.9237e-12
TMEM62	lightcyan	-0.58368	4.54939e-09	-0.546965	6.09248e-08
C1orf21	lightcyan	-0.583611	4.57289e-09	-0.717941	1.05263e-14
2020-03-08	lightcyan	-0.583601	4.57652e-09	-0.479435	3.44609e-06
RTN3	lightcyan	-0.582924	4.81494e-09	-0.780531	1.28906e-18
TNFSF10	lightcyan	0.582751	4.87753e-09	0.658302	7.55795e-12
TM7SF3	lightcyan	-0.582256	5.06156e-09	-0.625142	1.60296e-10
LOC731424	lightcyan	0.581771	5.24832e-09	0.496473	1.34917e-06
IL1RAP	lightcyan	0.581609	5.31214e-09	0.643419	3.11729e-11
HYOU1	lightcyan	0.581486	5.36097e-09	0.6512	1.50078e-11
ARHGAP21	lightcyan	0.580856	5.61812e-09	0.732288	1.67125e-15
LAMP5	lightcyan	0.579996	5.98899e-09	0.718447	9.88359e-15
GSTO2	lightcyan	-0.579358	6.27864e-09	-0.730947	1.99478e-15
DYNC1LI1	lightcyan	-0.578896	6.49703e-09	-0.6129	4.52864e-10
NT5E	lightcyan	0.578537	6.67145e-09	0.712627	2.02259e-14
HEYL	lightcyan	0.577602	7.14709e-09	0.649774	1.71856e-11
EXPH5	lightcyan	-0.577005	7.46787e-09	-0.74734	2.12596e-16
TP53INP1	lightcyan	-0.576521	7.73786e-09	-0.422533	5.61942e-05
SLC17A5	lightcyan	-0.576441	7.78323e-09	-0.57317	9.8783e-09
PLOD3	lightcyan	0.576439	7.78437e-09	0.671231	2.06622e-12
SMPDL3A	lightcyan	-0.576376	7.82007e-09	-0.802417	2.66372e-20
GRTP1	lightcyan	-0.575986	8.04709e-09	-0.775553	2.92897e-18
C20orf196	lightcyan	0.575829	8.13956e-09	0.557633	2.96049e-08
USP54	lightcyan	-0.575402	8.39804e-09	-0.745067	2.9294e-16
FOXQ1	lightcyan	-0.575212	8.51528e-09	-0.552066	4.32806e-08
FLJ45513	lightcyan	-0.575179	8.53561e-09	-0.59459	1.97488e-09
GALNT2	lightcyan	0.574704	8.83635e-09	0.686146	4.26024e-13
GABPB1	lightcyan	0.573021	9.98535e-09	0.664894	3.9329e-12
GANAB	lightcyan	0.572998	1.00022e-08	0.647482	2.13363e-11
CACNA2D2	lightcyan	-0.572981	1.0015e-08	-0.620746	2.33953e-10
MNAT1	lightcyan	0.572966	1.00257e-08	0.686015	4.32157e-13
PRKAG2-AS1	lightcyan	-0.572835	1.01208e-08	-0.543816	7.50312e-08
FLJ32255	lightcyan	0.572598	1.02963e-08	0.664756	3.98766e-12
PROSC	lightcyan	0.572193	1.06018e-08	0.486022	2.4125e-06
PRPS1	lightcyan	0.571977	1.07684e-08	0.687017	3.87396e-13
ARFIP1	lightcyan	-0.569931	1.24763e-08	-0.603701	9.60149e-10
LINC01315	lightcyan	-0.569919	1.24869e-08	-0.648439	1.94981e-11
SOX6	lightcyan	-0.569796	1.25982e-08	-0.60383	9.50245e-10
DSP	lightcyan	-0.569793	1.2601e-08	-0.649146	1.8239e-11
KIAA0922	lightcyan	0.569754	1.26357e-08	0.640779	3.97586e-11
C6orf141	lightcyan	0.569694	1.26899e-08	0.502877	9.35865e-07
BAG1	lightcyan	-0.569048	1.32904e-08	-0.678791	9.38912e-13
ZNF790-AS1	lightcyan	-0.567989	1.43339e-08	-0.582775	4.86878e-09
WDR7	lightcyan	-0.567708	1.46241e-08	-0.55471	3.61678e-08
FAM57A	lightcyan	-0.567501	1.48404e-08	-0.657085	8.51233e-12
PSAT1	lightcyan	-0.567394	1.49544e-08	-0.626719	1.39766e-10
MTAP	lightcyan	0.567064	1.5309e-08	0.547957	5.70283e-08
KCNK10	lightcyan	0.566542	1.58866e-08	0.606653	7.56401e-10
SLC2A12	lightcyan	-0.566342	1.61138e-08	-0.582155	5.09986e-09
S100A7A	lightcyan	0.566304	1.61569e-08	0.55216	4.30063e-08
TNC	lightcyan	0.566032	1.64718e-08	0.763154	2.07132e-17
ST5	lightcyan	0.565459	1.71528e-08	0.692825	2.03719e-13
ACOT9	lightcyan	0.565335	1.73031e-08	0.771384	5.73248e-18
SPRY4	lightcyan	0.565301	1.73446e-08	0.685913	4.36996e-13
GSTA4	lightcyan	-0.564066	1.8922e-08	-0.662645	4.9239e-12
DYNLRB2	lightcyan	-0.562822	2.06476e-08	-0.662796	4.85028e-12
CHST11	lightcyan	0.56204	2.18093e-08	0.735019	1.1617e-15
FAM69C	lightcyan	-0.56196	2.1931e-08	-0.639821	4.34035e-11
S100A10	lightcyan	0.561777	2.22124e-08	0.581065	5.53175e-09
C2orf76	lightcyan	-0.561704	2.2326e-08	-0.576162	7.94375e-09
AREG	lightcyan	0.561651	2.24091e-08	0.681321	7.17316e-13
DUSP18	lightcyan	0.561363	2.28636e-08	0.583091	4.75494e-09
RABGAP1L	lightcyan	-0.561115	2.32618e-08	-0.607352	7.14569e-10
RSPH1	lightcyan	-0.560512	2.42582e-08	-0.725731	3.93126e-15
YWHAH	lightcyan	0.560497	2.42846e-08	0.59701	1.63417e-09
SH3PXD2B	lightcyan	0.560247	2.4709e-08	0.694346	1.71712e-13
POPDC3	lightcyan	0.559463	2.60893e-08	0.707869	3.5851e-14
NUAK1	lightcyan	-0.559243	2.64897e-08	-0.456684	1.11734e-05
SMAD5-AS1	lightcyan	-0.558756	2.7397e-08	-0.714823	1.54707e-14
LINC00957	lightcyan	-0.558425	2.80316e-08	-0.653639	1.18816e-11
TNFAIP1	lightcyan	0.558343	2.81907e-08	0.711251	2.38973e-14
HLA-DQB2	lightcyan	-0.558026	2.88134e-08	-0.645452	2.58042e-11
LAMB3	lightcyan	0.557984	2.88959e-08	0.747014	2.22638e-16
LOC100506990	lightcyan	-0.557922	2.90206e-08	-0.603865	9.47555e-10
ATIC	lightcyan	0.557141	3.06232e-08	0.630608	9.93411e-11
TSPAN33	lightcyan	-0.557064	3.07856e-08	-0.541778	8.57611e-08
AK9	lightcyan	-0.556061	3.29788e-08	-0.59425	2.02778e-09
CELSR1	lightcyan	0.555676	3.386e-08	0.570414	1.20514e-08
MRPL47	lightcyan	0.555645	3.39307e-08	0.606066	7.93254e-10
NFAT5	lightcyan	-0.55466	3.62914e-08	-0.601544	1.14125e-09
SLC25A32	lightcyan	0.554441	3.68365e-08	0.666711	3.27547e-12
SOX4	lightcyan	0.554311	3.71652e-08	0.650332	1.63e-11
ESCO1	lightcyan	-0.554187	3.74796e-08	-0.629827	1.06436e-10
RRS1	lightcyan	0.554166	3.75325e-08	0.65756	8.12656e-12
RNASE1	lightcyan	0.553874	3.82853e-08	0.572651	1.02568e-08
SMARCD2	lightcyan	-0.553819	3.84304e-08	-0.685215	4.71455e-13
FAIM3	lightcyan	0.553626	3.89374e-08	0.660585	6.03885e-12
FOXN2	lightcyan	0.552995	4.06408e-08	0.657927	7.84098e-12
PTGS2	lightcyan	0.552614	4.17037e-08	0.673097	1.70432e-12
SULT1E1	lightcyan	-0.552308	4.25761e-08	-0.516461	4.20134e-07
FBN2	lightcyan	0.552187	4.29274e-08	0.556763	3.14289e-08
PLLP	lightcyan	-0.551974	4.35505e-08	-0.774914	3.24963e-18
ASF1A	lightcyan	-0.551445	4.51319e-08	-0.564937	1.77963e-08
MITF	lightcyan	-0.551188	4.59222e-08	-0.591285	2.55118e-09
MMP13	lightcyan	0.549468	5.15494e-08	0.646745	2.28653e-11
LIPG	lightcyan	0.547949	5.70618e-08	0.646257	2.3935e-11
SLC2A9	lightcyan	0.547921	5.71661e-08	0.592813	2.26715e-09
LOXL2	lightcyan	0.547095	6.03987e-08	0.681386	7.12348e-13
CTSL	lightcyan	0.547041	6.06165e-08	0.682867	6.0766e-13
ZNF706	lightcyan	-0.546708	6.19728e-08	-0.576316	7.85478e-09
LHFPL2	lightcyan	0.54559	6.6741e-08	0.703076	6.30926e-14
IRX3	lightcyan	-0.545445	6.73849e-08	-0.695279	1.54557e-13
MKRN1	lightcyan	-0.545129	6.88055e-08	-0.689347	2.99889e-13
LOC646014	lightcyan	-0.545017	6.93172e-08	-0.509715	6.28072e-07
TENM3	lightcyan	0.544469	7.18722e-08	0.611382	5.13491e-10
ABHD6	lightcyan	-0.54435	7.24374e-08	-0.608832	6.33243e-10
APPL1	lightcyan	-0.544205	7.31328e-08	-0.631642	9.06541e-11
TAPBP	lightcyan	0.543806	7.50805e-08	0.567505	1.48368e-08
TFAP2B	lightcyan	-0.543111	7.85909e-08	-0.587376	3.44084e-09
OCLN	lightcyan	-0.542777	8.03312e-08	-0.695933	1.43526e-13
LNX1	lightcyan	-0.542249	8.31551e-08	-0.687445	3.69659e-13
SH3TC1	lightcyan	0.541604	8.67376e-08	0.620105	2.47103e-10
MFHAS1	lightcyan	0.541316	8.83898e-08	0.609014	6.23884e-10
LOC339803	lightcyan	0.540519	9.31025e-08	0.654725	1.07011e-11
DNAJA4	lightcyan	-0.54036	9.40671e-08	-0.651335	1.48152e-11
AMIGO2	lightcyan	0.540079	9.58018e-08	0.742695	4.07834e-16
CREB3L2	lightcyan	0.540078	9.58087e-08	0.708542	3.30882e-14
SNX10	lightcyan	0.539806	9.7515e-08	0.635684	6.3164e-11
LGALS3	lightcyan	-0.539031	1.02547e-07	-0.583133	4.74011e-09
PLEK2	lightcyan	0.538721	1.04627e-07	0.595058	1.90403e-09
IER3IP1	lightcyan	-0.538639	1.05182e-07	-0.556553	3.18842e-08
MAGI1	lightcyan	-0.538083	1.09034e-07	-0.642246	3.47411e-11
MYH14	lightcyan	-0.537681	1.11898e-07	-0.782853	8.72653e-19
MRPL48	lightcyan	0.537365	1.14203e-07	0.579186	6.35905e-09
AIM2	lightcyan	0.537287	1.14775e-07	0.660088	6.34226e-12
OXA1L	lightcyan	-0.537248	1.15067e-07	-0.544499	7.1731e-08
IL13RA1	lightcyan	0.536802	1.18416e-07	0.611759	4.97728e-10
PHLDB2	lightcyan	0.536559	1.20282e-07	0.686795	3.96928e-13
RP11-247L20.4	lightcyan	-0.536457	1.21071e-07	-0.611607	5.04023e-10
TNIP2	lightcyan	0.536394	1.21558e-07	0.548638	5.44929e-08
STC1	lightcyan	0.536387	1.21618e-07	0.572498	1.0371e-08
GET4	lightcyan	-0.536353	1.21885e-07	-0.656757	8.78811e-12
SCG5	lightcyan	0.536196	1.23116e-07	0.635907	6.19121e-11
TIMMDC1	lightcyan	0.536106	1.23829e-07	0.6181	2.92932e-10
MARK1	lightcyan	0.536008	1.24611e-07	0.7192	8.99694e-15
GALNT10	lightcyan	0.53595	1.25076e-07	0.687489	3.67879e-13
FEZ1	lightcyan	0.535657	1.2745e-07	0.639137	4.61985e-11
GRIPAP1	lightcyan	-0.535267	1.30672e-07	-0.573202	9.85576e-09
RAC2	lightcyan	0.534794	1.34687e-07	0.713523	1.81358e-14
WDR54	lightcyan	0.534633	1.36077e-07	0.6627	4.89699e-12
LEPREL1	lightcyan	0.533843	1.43111e-07	0.575951	8.06763e-09
ELL3	lightcyan	-0.533701	1.44405e-07	-0.695041	1.58771e-13
MRGBP	lightcyan	0.533645	1.44927e-07	0.689929	2.81194e-13
SULF1	lightcyan	0.533192	1.49166e-07	0.736353	9.70965e-16
DESI2	lightcyan	0.532831	1.52624e-07	0.570555	1.19297e-08
NCOA2	lightcyan	-0.532774	1.53178e-07	-0.579871	6.0445e-09
HEIH	lightcyan	-0.532385	1.57006e-07	-0.541489	8.73954e-08
UAP1	lightcyan	0.532108	1.59784e-07	0.656177	9.29795e-12
PLEKHA1	lightcyan	-0.532065	1.60225e-07	-0.681	7.42358e-13
AK3	lightcyan	-0.531888	1.62026e-07	-0.622396	2.03142e-10
ZBTB3	lightcyan	-0.531672	1.6426e-07	-0.61606	3.47849e-10
RPS16P5	lightcyan	-0.53159	1.65106e-07	-0.529497	1.88399e-07
PTGS1	lightcyan	-0.53062	1.75541e-07	-0.644013	2.95002e-11
PDIA4	lightcyan	0.530126	1.81088e-07	0.659985	6.40728e-12
C11orf1	lightcyan	-0.529504	1.8831e-07	-0.581296	5.43724e-09
ASAH1	lightcyan	-0.529319	1.90515e-07	-0.683832	5.47628e-13
BCCIP	lightcyan	0.529079	1.93407e-07	0.59891	1.40689e-09
ENGASE	lightcyan	-0.528502	2.00524e-07	-0.485322	2.50655e-06
NEK6	lightcyan	0.527203	2.17479e-07	0.73218	1.69529e-15
NYNRIN	lightcyan	-0.526767	2.23467e-07	-0.636964	5.62753e-11
TSLP	lightcyan	0.526655	2.25035e-07	0.591366	2.53529e-09
CA9	lightcyan	0.526414	2.28438e-07	0.517027	4.06027e-07
CLINT1	lightcyan	-0.525834	2.36816e-07	-0.614573	3.93981e-10
FAT1	lightcyan	0.525698	2.38828e-07	0.515843	4.36049e-07
NUDT12	lightcyan	-0.525587	2.40481e-07	-0.600571	1.23321e-09
ARRB2	lightcyan	0.525572	2.40697e-07	0.58597	3.8283e-09
MRPS17	lightcyan	0.525459	2.42392e-07	0.637049	5.58435e-11
ANAPC16	lightcyan	-0.524769	2.52981e-07	-0.589433	2.9412e-09
SERGEF	lightcyan	-0.524693	2.54168e-07	-0.570212	1.22278e-08
FMO5	lightcyan	-0.523997	2.65346e-07	-0.625645	1.53458e-10
RNF34	lightcyan	0.523874	2.67359e-07	0.526094	2.33024e-07
ADAM12	lightcyan	0.523824	2.68184e-07	0.671794	1.94988e-12
RAB11FIP5	lightcyan	0.522641	2.88445e-07	0.646926	2.24804e-11
ANGPTL4	lightcyan	0.522294	2.94672e-07	0.482394	2.93879e-06
FKBP11	lightcyan	0.522236	2.95707e-07	0.644856	2.72777e-11
ZNF420	lightcyan	-0.52157	3.08032e-07	-0.630122	1.03698e-10
OCA2	lightcyan	-0.52147	3.09937e-07	-0.600004	1.29006e-09
INTU	lightcyan	-0.521445	3.10406e-07	-0.63638	5.93243e-11
TTYH3	lightcyan	0.520943	3.20083e-07	0.626637	1.40769e-10
LTBP1	lightcyan	0.520809	3.22716e-07	0.712287	2.10785e-14
ADAMTS12	lightcyan	0.519301	3.53776e-07	0.668919	2.61784e-12
SELENBP1	lightcyan	-0.519081	3.58538e-07	-0.571351	1.12662e-08
ARAP3	lightcyan	0.519007	3.60156e-07	0.523009	2.81997e-07
VLDLR	lightcyan	0.518739	3.66055e-07	0.655904	9.54751e-12
MIR34A	lightcyan	-0.518592	3.69338e-07	-0.54287	7.98415e-08
ZNF230	lightcyan	-0.518332	3.75207e-07	-0.589243	2.98433e-09
IKBIP	lightcyan	0.518254	3.76982e-07	0.705813	4.5754e-14
GNAI1	lightcyan	-0.517529	3.93908e-07	-0.550328	4.86599e-08
ELAVL2	lightcyan	0.517461	3.95519e-07	0.490728	1.86138e-06
GNA12	lightcyan	0.517217	4.01403e-07	0.719154	9.04902e-15
IL1A	lightcyan	0.516842	4.10596e-07	0.478919	3.54267e-06
CANT1	lightcyan	0.51671	4.13858e-07	0.599393	1.35415e-09
GCHFR	lightcyan	-0.516622	4.16071e-07	-0.529249	1.91348e-07
PEG3-AS1	lightcyan	-0.516253	4.25433e-07	-0.538039	1.09341e-07
ADCK3	lightcyan	-0.51599	4.32218e-07	-0.698744	1.04163e-13
NUP62	lightcyan	0.515511	4.44842e-07	0.470738	5.45682e-06
TNFRSF10B	lightcyan	0.515115	4.55532e-07	0.734003	1.33061e-15
IL24	lightcyan	0.515089	4.56237e-07	0.618366	2.86404e-10
LAMA3	lightcyan	0.515017	4.5821e-07	0.6143	4.03055e-10
BEX2	lightcyan	-0.514618	4.69311e-07	-0.530445	1.77492e-07
CCDC126	lightcyan	-0.514473	4.73407e-07	-0.641835	3.60812e-11
GANC	lightcyan	0.514158	4.82413e-07	0.555867	3.34186e-08
LOC101927164	lightcyan	-0.513949	4.88487e-07	-0.767339	1.085e-17
ZNF670	lightcyan	0.513891	4.90185e-07	0.494791	1.48339e-06
GJA3	lightcyan	0.513331	5.06836e-07	0.475697	4.20535e-06
NTPCR	lightcyan	0.513327	5.06965e-07	0.490441	1.89131e-06
PRKCDBP	lightcyan	0.512881	5.20616e-07	0.622221	2.06225e-10
IL12RB2	lightcyan	0.512677	5.26984e-07	0.516049	4.30669e-07
UBLCP1	lightcyan	0.512499	5.32597e-07	0.556255	3.25422e-08
WDR1	lightcyan	0.512243	5.40746e-07	0.586126	3.78321e-09
BICD1	lightcyan	0.512209	5.41853e-07	0.645269	2.62484e-11
WDSUB1	lightcyan	-0.511999	5.48647e-07	-0.608791	6.35376e-10
RPARP-AS1	lightcyan	-0.511882	5.52476e-07	-0.665056	3.86949e-12
FAM206A	lightcyan	-0.511468	5.66225e-07	-0.506787	7.45802e-07
TSC1	lightcyan	-0.510928	5.84618e-07	-0.591323	2.54374e-09
MN1	lightcyan	0.510559	5.97543e-07	0.738829	6.94102e-16
KCNMB4	lightcyan	-0.510487	6.00087e-07	-0.524835	2.51943e-07
SH3KBP1	lightcyan	-0.510228	6.09337e-07	-0.478325	3.65688e-06
SAT1	lightcyan	0.509551	6.34144e-07	0.722766	5.74232e-15
TCEA3	lightcyan	-0.509524	6.35159e-07	-0.755839	6.2171e-17
CLDN1	lightcyan	-0.509478	6.36893e-07	-0.676621	1.18032e-12
RP4-539M6.21	lightcyan	0.509449	6.37965e-07	0.52182	3.03363e-07
HSF2BP	lightcyan	0.508581	6.71412e-07	0.642509	3.39078e-11
COX7B	lightcyan	-0.508351	6.80536e-07	-0.592029	2.40889e-09
ACAT1	lightcyan	-0.508213	6.86074e-07	-0.640915	3.92634e-11
EIF4A3	lightcyan	0.50767	7.08249e-07	0.573925	9.35142e-09
CYB561A3	lightcyan	-0.50732	7.22937e-07	-0.64567	2.52851e-11
COL10A1	lightcyan	0.507081	7.3309e-07	0.561822	2.21434e-08
UGDH	lightcyan	0.506982	7.37348e-07	0.561225	2.30838e-08
HIST1H3A	lightcyan	0.506922	7.39973e-07	0.54907	5.29407e-08
FER	lightcyan	0.506882	7.41696e-07	0.537041	1.1661e-07
BCAM	lightcyan	0.506858	7.42748e-07	0.520693	3.25009e-07
ATP1B1	lightcyan	0.506776	7.46311e-07	0.625676	1.53048e-10
ODC1	lightcyan	0.506696	7.49788e-07	0.694381	1.71053e-13
WDR70	lightcyan	0.506125	7.75212e-07	0.44682	1.81379e-05
TMEM198	lightcyan	0.506112	7.75786e-07	0.605503	8.30266e-10
MMP9	lightcyan	0.505299	8.13391e-07	0.613232	4.40527e-10
AK7	lightcyan	-0.505212	8.17512e-07	-0.655064	1.03568e-11
CAPN3	lightcyan	-0.504933	8.30878e-07	-0.548211	5.60717e-08
DUSP28	lightcyan	-0.504498	8.52126e-07	-0.582247	5.06489e-09
PGAP3	lightcyan	-0.503895	8.82374e-07	-0.669108	2.56793e-12
ZNF469	lightcyan	0.503743	8.90193e-07	0.616717	3.29164e-10
GULP1	lightcyan	-0.503106	9.23585e-07	-0.600753	1.21549e-09
SPECC1	lightcyan	0.503102	9.23799e-07	0.660948	5.82646e-12
PRKCQ	lightcyan	0.50261	9.50367e-07	0.647309	2.16872e-11
RRAS2	lightcyan	0.502599	9.51004e-07	0.685586	4.52845e-13
EIF3F	lightcyan	-0.502456	9.58889e-07	-0.710297	2.68096e-14
ZNF226	lightcyan	-0.502446	9.59402e-07	-0.61435	4.01374e-10
LGALS1	lightcyan	0.502378	9.63182e-07	0.553241	3.9969e-08
FAF2	lightcyan	0.502169	9.74849e-07	0.562598	2.0974e-08
FAM49B	lightcyan	0.502058	9.81099e-07	0.587681	3.36194e-09
PEX7	lightcyan	-0.50177	9.97505e-07	-0.603504	9.75496e-10
NOP2	lightcyan	0.501498	1.0132e-06	0.581636	5.30136e-09
CMSS1	lightcyan	0.501316	1.02382e-06	0.643343	3.13922e-11
TET3	lightcyan	-0.501296	1.02502e-06	-0.694375	1.71162e-13
KRBA1	lightcyan	0.501089	1.03727e-06	0.531357	1.67564e-07
THY1	lightcyan	0.501046	1.03981e-06	0.708221	3.4378e-14
LRRC75B	lightcyan	0.500946	1.04581e-06	0.48643	2.35924e-06
GSTM2	lightcyan	-0.500572	1.06844e-06	-0.561137	2.32269e-08
USP3	lightcyan	-0.50052	1.07166e-06	-0.540591	9.26677e-08
EFNB3	lightcyan	-0.499913	1.10955e-06	-0.407457	0.000108695
GSTM3	lightcyan	-0.499863	1.11272e-06	-0.538901	1.03413e-07
IGBP1	lightcyan	-0.499285	1.15001e-06	-0.586804	3.59383e-09
OSBPL5	lightcyan	-0.499218	1.15445e-06	-0.570602	1.18901e-08
PITPNM3	lightcyan	-0.499186	1.15654e-06	-0.546945	6.10041e-08
LOC728730	lightcyan	-0.499064	1.16458e-06	-0.547335	5.94431e-08
GNB5	lightcyan	0.498878	1.17702e-06	0.613896	4.16857e-10
KDM1A	lightcyan	0.498374	1.21125e-06	0.535993	1.24731e-07
TDO2	lightcyan	0.498028	1.23536e-06	0.585278	4.0337e-09
MAP3K8	lightcyan	-0.49802	1.23587e-06	-0.514339	4.77226e-07
TFAP2C	lightcyan	-0.49747	1.2751e-06	-0.650036	1.67634e-11
PLBD2	lightcyan	0.496163	1.37303e-06	0.607595	7.00588e-10
S100A6	lightcyan	0.495304	1.44112e-06	0.543498	7.66183e-08
MSANTD3	lightcyan	0.495104	1.45748e-06	0.676826	1.15518e-12
PDE8A	lightcyan	0.494993	1.46664e-06	0.584698	4.21409e-09
RP11-252E2.1	lightcyan	-0.494046	1.54675e-06	-0.429328	4.13085e-05
ADAM10	lightcyan	0.493865	1.56256e-06	0.595107	1.89683e-09
SLC35F3	lightcyan	0.493712	1.57599e-06	0.625659	1.53266e-10
TRAPPC6A	lightcyan	-0.493662	1.58038e-06	-0.660769	5.9305e-12
C11orf54	lightcyan	-0.493136	1.62762e-06	-0.559048	2.68493e-08
MAP4	lightcyan	0.492874	1.65168e-06	0.488453	2.11105e-06
RAB22A	lightcyan	0.492277	1.70769e-06	0.578846	6.52075e-09
L3MBTL4	lightcyan	-0.492074	1.72714e-06	-0.631584	9.11156e-11
FERMT1	lightcyan	0.492067	1.72783e-06	0.38672	0.000256265
FUCA2	lightcyan	0.492045	1.72995e-06	0.675774	1.28989e-12
RNF112	lightcyan	-0.491766	1.75699e-06	-0.54313	7.8489e-08
NOX4	lightcyan	0.491754	1.75822e-06	0.660862	5.87616e-12
CCDC71L	lightcyan	0.491247	1.80847e-06	0.694024	1.78064e-13
CBX7	lightcyan	-0.491205	1.8127e-06	-0.619161	2.67743e-10
DNAJC19	lightcyan	-0.491052	1.82818e-06	-0.568458	1.38632e-08
SIRPA	lightcyan	0.491031	1.83037e-06	0.582722	4.88811e-09
CUL3	lightcyan	-0.490939	1.83973e-06	-0.60811	6.71746e-10
MSR1	lightcyan	0.49093	1.84068e-06	0.645221	2.6366e-11
SCCPDH	lightcyan	-0.490812	1.85278e-06	-0.588655	3.12137e-09
CD207	lightcyan	-0.490603	1.87439e-06	-0.59046	2.71831e-09
CRELD2	lightcyan	0.490586	1.87615e-06	0.647111	2.20932e-11
MRPS18C	lightcyan	-0.490468	1.8885e-06	-0.509132	6.50008e-07
CTSF	lightcyan	-0.490001	1.93801e-06	-0.485161	2.52876e-06
TNFRSF10D	lightcyan	0.48989	1.94998e-06	0.578285	6.79645e-09
MYOM2	lightcyan	-0.489871	1.95202e-06	-0.572427	1.04239e-08
TNIP3	lightcyan	0.489488	1.99377e-06	0.533798	1.43524e-07
TAS2R4	lightcyan	-0.488138	2.14803e-06	-0.563598	1.95538e-08
GPLD1	lightcyan	-0.488055	2.15788e-06	-0.683578	5.62888e-13
HTR7	lightcyan	0.487713	2.19878e-06	0.658213	7.62435e-12
SERPINA1	lightcyan	0.487562	2.21722e-06	0.633035	8.00847e-11
LINC00324	lightcyan	-0.487347	2.24352e-06	-0.539534	9.9253e-08
AKT1	lightcyan	0.487223	2.25885e-06	0.605056	8.60827e-10
CLDN12	lightcyan	0.487055	2.27981e-06	0.509893	6.21491e-07
GMPR	lightcyan	-0.486451	2.35649e-06	-0.40405	0.000125632
FOXF2	lightcyan	0.486423	2.36019e-06	0.642027	3.54476e-11
NUDT7	lightcyan	-0.485839	2.43672e-06	-0.573142	9.89825e-09
CTSC	lightcyan	0.485445	2.48979e-06	0.653979	1.14997e-11
SEL1L3	lightcyan	0.485218	2.52086e-06	0.679182	9.00799e-13
KY	lightcyan	-0.485154	2.52959e-06	-0.545246	6.82783e-08
FOXO3	lightcyan	-0.485086	2.53905e-06	-0.502893	9.35017e-07
IKZF5	lightcyan	-0.485034	2.54622e-06	-0.514284	4.78783e-07
CMTM3	lightcyan	0.484795	2.57964e-06	0.614189	4.06802e-10
LUZP1	lightcyan	0.484754	2.58546e-06	0.624808	1.6501e-10
KLHDC7B	lightcyan	0.484684	2.59529e-06	0.584264	4.35417e-09
IRAK1BP1	lightcyan	-0.484114	2.67711e-06	-0.557281	3.03288e-08
SEC23A	lightcyan	0.483742	2.73177e-06	0.588667	3.11847e-09
LYRM9	lightcyan	-0.483591	2.75418e-06	-0.568312	1.40082e-08
FIG4	lightcyan	-0.483226	2.80936e-06	-0.516518	4.18675e-07
CXCL6	lightcyan	0.48291	2.85783e-06	0.466125	6.92826e-06
PGM2L1	lightcyan	0.482137	2.97987e-06	0.645211	2.63916e-11
IGLC1	lightcyan	0.481799	3.03481e-06	0.534857	1.34143e-07
DHRS7	lightcyan	0.481453	3.09197e-06	0.658007	7.77938e-12
EPAS1	lightcyan	0.481352	3.10884e-06	0.655495	9.93384e-12
LOC102723845	lightcyan	-0.481302	3.11725e-06	-0.500713	1.05984e-06
IL1RL1	lightcyan	0.481125	3.14706e-06	0.597754	1.54123e-09
CDC42BPG	lightcyan	-0.48096	3.17509e-06	-0.625179	1.59782e-10
LOC441461	lightcyan	-0.480656	3.22756e-06	-0.555182	3.50222e-08
CCL20	lightcyan	0.480021	3.33954e-06	0.551694	4.43801e-08
RP11-803D5.4	lightcyan	0.479756	3.38727e-06	0.572701	1.02201e-08
PANX1	lightcyan	0.47798	3.72483e-06	0.695943	1.43363e-13
SPPL3	lightcyan	-0.477947	3.73136e-06	-0.635842	6.22757e-11
RGL1	lightcyan	-0.47786	3.74866e-06	-0.44876	1.65092e-05
DLG5	lightcyan	-0.477831	3.75457e-06	-0.52251	2.90774e-07
SVIP	lightcyan	-0.477618	3.79736e-06	-0.649825	1.71031e-11
SERPINA3	lightcyan	0.477577	3.80581e-06	0.511054	5.80293e-07
IFITM2	lightcyan	0.477263	3.86984e-06	0.576558	7.71674e-09
PSMA7	lightcyan	0.477041	3.91594e-06	0.583942	4.46073e-09
ZBED4	lightcyan	0.476558	4.01759e-06	0.422001	5.75486e-05
ZDHHC3	lightcyan	-0.476199	4.09484e-06	-0.66707	3.15847e-12
MUS81	lightcyan	0.475927	4.1544e-06	0.42527	4.96828e-05
EXT2	lightcyan	0.475919	4.15609e-06	0.598669	1.43388e-09
BAG5	lightcyan	-0.475678	4.20957e-06	-0.478593	3.60499e-06
NXN	lightcyan	0.475645	4.21691e-06	0.633238	7.86516e-11
STK17A	lightcyan	0.475024	4.3577e-06	0.606528	7.64079e-10
ASS1	lightcyan	-0.474727	4.42664e-06	-0.468016	6.28489e-06
RPH3AL	lightcyan	-0.474477	4.48544e-06	-0.542416	8.22518e-08
PTPN1	lightcyan	0.474203	4.55071e-06	0.549016	5.31325e-08
EMP1	lightcyan	-0.47344	4.73699e-06	-0.58266	4.91102e-09
COL11A1	lightcyan	0.473313	4.76888e-06	0.598549	1.4476e-09
LOC101929761	lightcyan	-0.473105	4.82126e-06	-0.570458	1.20135e-08
ZDHHC7	lightcyan	0.472613	4.94739e-06	0.526751	2.23696e-07
NMNAT3	lightcyan	-0.472177	5.06168e-06	-0.661628	5.447e-12
TTC12	lightcyan	-0.472149	5.06901e-06	-0.537111	1.16084e-07
CASC7	lightcyan	0.471819	5.15725e-06	0.461457	8.79072e-06
WDR91	lightcyan	0.471521	5.23837e-06	0.509766	6.2619e-07
CHMP2B	lightcyan	-0.47118	5.33237e-06	-0.454606	1.23894e-05
COL4A1	lightcyan	0.470699	5.46803e-06	0.690292	2.70117e-13
PRSS23	lightcyan	0.470219	5.60638e-06	0.722442	5.98306e-15
B3GALTL	lightcyan	0.469774	5.73755e-06	0.515024	4.58024e-07
BID	lightcyan	0.469715	5.75523e-06	0.54085	9.11127e-08
GOLGA4	lightcyan	-0.469484	5.82485e-06	-0.538359	1.07106e-07
RIC3	lightcyan	-0.469207	5.90899e-06	-0.508414	6.78027e-07
SERPINH1	lightcyan	0.469191	5.91407e-06	0.672898	1.73989e-12
ITGA6	lightcyan	0.468838	6.02332e-06	0.677075	1.12533e-12
TTC7B	lightcyan	0.468759	6.04788e-06	0.55334	3.97002e-08
SPOCD1	lightcyan	0.468618	6.09209e-06	0.53705	1.16539e-07
FOXO6	lightcyan	-0.468481	6.13575e-06	-0.546389	6.3301e-08
CXCL17	lightcyan	0.468443	6.14782e-06	0.392069	0.000206514
CDHR1	lightcyan	-0.468219	6.2192e-06	-0.549718	5.06917e-08
EPHB1	lightcyan	-0.468072	6.26686e-06	-0.491774	1.75619e-06
AP1AR	lightcyan	-0.467837	6.34325e-06	-0.509162	6.48872e-07
BC016361	lightcyan	0.467819	6.34919e-06	0.560849	2.36966e-08
PHTF1	lightcyan	0.467301	6.5212e-06	0.570502	1.19758e-08
SLITRK2	lightcyan	-0.466815	6.68683e-06	-0.406039	0.000115469
SLC52A1	lightcyan	-0.466661	6.73991e-06	-0.513416	5.04264e-07
CTSZ	lightcyan	0.466059	6.95159e-06	0.552937	4.08023e-08
PLEKHG4B	lightcyan	0.46596	6.98714e-06	0.515272	4.51273e-07
SYBU	lightcyan	-0.465758	7.06013e-06	-0.538392	1.06878e-07
GSS	lightcyan	0.465616	7.11176e-06	0.415099	7.81037e-05
ZKSCAN5	lightcyan	0.465505	7.15216e-06	0.464467	7.54271e-06
D2HGDH	lightcyan	-0.4652	7.26489e-06	-0.591901	2.43277e-09
ZNF571	lightcyan	-0.464988	7.34425e-06	-0.595547	1.83267e-09
ZNF383	lightcyan	-0.464801	7.41498e-06	-0.507301	7.23745e-07
TP53BP2	lightcyan	0.464437	7.55426e-06	0.474802	4.40915e-06
DCAF12	lightcyan	-0.46441	7.5645e-06	-0.58517	4.0667e-09
C17orf100	lightcyan	-0.463938	7.74928e-06	-0.52766	2.11373e-07
MTFP1	lightcyan	0.463898	7.76508e-06	0.531527	1.65773e-07
GNLY	lightcyan	0.463881	7.77187e-06	0.553676	3.88064e-08
ST6GALNAC2	lightcyan	-0.461789	8.64419e-06	-0.540417	9.37229e-08
CHST15	lightcyan	0.461534	8.75661e-06	0.573583	9.58704e-09
PROS1	lightcyan	-0.461329	8.84771e-06	-0.557653	2.95643e-08
TET2	lightcyan	-0.460976	9.0072e-06	-0.493468	1.59773e-06
PARD3	lightcyan	-0.460349	9.29682e-06	-0.641772	3.62898e-11
FAM210A	lightcyan	0.460304	9.31824e-06	0.577849	7.01848e-09
C1QTNF6	lightcyan	0.45959	9.65927e-06	0.653011	1.2621e-11
PTPRD	lightcyan	0.459274	9.8141e-06	0.44205	2.28044e-05
LOC100287590	lightcyan	-0.458756	1.00728e-05	-0.52064	3.26063e-07
RASSF1	lightcyan	0.458552	1.01766e-05	0.37061	0.000480372
DISP1	lightcyan	-0.458259	1.03272e-05	-0.58836	3.19242e-09
PLEKHM3	lightcyan	-0.458255	1.03294e-05	-0.462264	8.43809e-06
FST	lightcyan	0.458051	1.04355e-05	0.558642	2.76137e-08
SLC45A4	lightcyan	-0.457954	1.04865e-05	-0.573333	9.76259e-09
ABL1	lightcyan	0.457537	1.07075e-05	0.53684	1.18123e-07
AFAP1L2	lightcyan	0.457035	1.09792e-05	0.65624	9.2412e-12
RP11-532F12.5	lightcyan	-0.456615	1.12122e-05	-0.552007	4.34526e-08
ERCC5	lightcyan	-0.456495	1.12795e-05	-0.532312	1.57733e-07
EHBP1L1	lightcyan	0.456234	1.14268e-05	0.411601	9.09524e-05
GPR39	lightcyan	0.455305	1.19676e-05	0.537213	1.15325e-07
DYRK2	lightcyan	0.454918	1.21991e-05	0.58415	4.39165e-09
TPSB2	lightcyan	0.454884	1.22199e-05	0.483451	2.77525e-06
ACTRT3	lightcyan	0.454748	1.23025e-05	0.548937	5.34162e-08
FLRT3	lightcyan	0.454651	1.2362e-05	0.48446	2.62721e-06
STEAP1B	lightcyan	0.454159	1.26666e-05	0.475142	4.33067e-06
STC2	lightcyan	0.453842	1.28669e-05	0.486323	2.37316e-06
ALDH5A1	lightcyan	-0.452552	1.37122e-05	-0.608937	6.27853e-10
PIK3CB	lightcyan	-0.452497	1.37495e-05	-0.582609	4.92955e-09
FGF11	lightcyan	0.452407	1.38107e-05	0.440153	2.49541e-05
BNC1	lightcyan	0.452047	1.40576e-05	0.716965	1.18806e-14
TMEM171	lightcyan	0.451941	1.41307e-05	0.445283	1.95338e-05
LRMP	lightcyan	-0.451819	1.42155e-05	-0.464443	7.55198e-06
ZNF431	lightcyan	-0.45168	1.43129e-05	-0.53727	1.14902e-07
AFAP1L1	lightcyan	0.451501	1.44397e-05	0.621847	2.12946e-10
GSTM1	lightcyan	-0.451258	1.46128e-05	-0.5046	8.47078e-07
NFIX	lightcyan	-0.450914	1.48608e-05	-0.602355	1.06959e-09
C14orf28	lightcyan	-0.450832	1.4921e-05	-0.458339	1.02861e-05
DPP6	lightcyan	-0.450773	1.49641e-05	-0.520803	3.22824e-07
MAP3K4	lightcyan	0.450394	1.52445e-05	0.383703	0.000288986
WDR60	lightcyan	-0.45017	1.54117e-05	-0.541862	8.52905e-08
TSHZ3	lightcyan	0.449785	1.57047e-05	0.666999	3.18143e-12
TRIM14	lightcyan	0.449727	1.57493e-05	0.480743	3.21237e-06
EAF2	lightcyan	0.449623	1.58289e-05	0.440892	2.40952e-05
CCDC51	lightcyan	0.448923	1.63786e-05	0.402111	0.000136331
RUNX2	lightcyan	0.448875	1.64166e-05	0.522135	2.97549e-07
NPNT	lightcyan	0.448794	1.64814e-05	0.46368	7.85186e-06
FRY	lightcyan	-0.448744	1.65219e-05	-0.567594	1.47433e-08
TPPP3	lightcyan	-0.448448	1.67616e-05	-0.593015	2.23195e-09
GDPD2	lightcyan	-0.448305	1.68785e-05	-0.46419	7.64996e-06
HPGDS	lightcyan	-0.448255	1.69194e-05	-0.475435	4.26399e-06
COA6	lightcyan	0.448149	1.70068e-05	0.503737	8.90529e-07
CARD10	lightcyan	0.448088	1.70567e-05	0.436641	2.94426e-05
LINC00263	lightcyan	-0.448036	1.71005e-05	-0.480997	3.16889e-06
DPP3	lightcyan	0.447793	1.73029e-05	0.591504	2.50843e-09
SALL2	lightcyan	-0.447792	1.7304e-05	-0.496068	1.38035e-06
LINC00491	lightcyan	0.447428	1.76116e-05	0.569541	1.28299e-08
TMEM101	lightcyan	-0.447375	1.76571e-05	-0.522058	2.98957e-07
KCNK1	lightcyan	0.446826	1.81328e-05	0.421074	5.99824e-05
RBM8A	lightcyan	-0.446636	1.82998e-05	-0.531588	1.65129e-07
KYNU	lightcyan	0.446239	1.8654e-05	0.630705	9.84969e-11
NAT14	lightcyan	0.446053	1.8822e-05	0.525422	2.42945e-07
LOC338620	lightcyan	0.445992	1.88781e-05	0.553657	3.88553e-08
WNT7A	lightcyan	0.445707	1.9139e-05	0.450943	1.48397e-05
FKRP	lightcyan	0.44561	1.92286e-05	0.486606	2.33666e-06
MICAL2	lightcyan	0.445545	1.92894e-05	0.55521	3.49555e-08
RP11-539I5.1	lightcyan	-0.44526	1.95554e-05	-0.58155	5.33521e-09
CEP44	lightcyan	-0.444144	2.06326e-05	-0.531222	1.68999e-07
ODF2L	lightcyan	0.443448	2.13319e-05	0.546902	6.11792e-08
CRYM	lightcyan	-0.443238	2.15475e-05	-0.543386	7.71845e-08
GSTM4	lightcyan	-0.443077	2.17138e-05	-0.421399	5.91187e-05
PROSER2	lightcyan	0.443052	2.17392e-05	0.476446	4.04157e-06
MESDC1	lightcyan	0.442957	2.18385e-05	0.673202	1.686e-12
IGLL3P	lightcyan	0.442043	2.28117e-05	0.510718	5.91931e-07
C15orf59	lightcyan	-0.442025	2.28315e-05	-0.530869	1.72809e-07
OLFML2B	lightcyan	0.441961	2.29009e-05	0.606638	7.57303e-10
NABP1	lightcyan	0.44169	2.31987e-05	0.583003	4.78649e-09
PXDNL	lightcyan	0.441624	2.32716e-05	0.547847	5.74486e-08
DNAH5	lightcyan	0.441612	2.32845e-05	0.540955	9.04945e-08
ZDHHC4	lightcyan	0.441559	2.33438e-05	0.546127	6.44101e-08
CXCL3	lightcyan	0.441438	2.34786e-05	0.548016	5.68065e-08
NEMF	lightcyan	-0.441149	2.38034e-05	-0.54578	6.59085e-08
B3GALT6	lightcyan	0.440348	2.47249e-05	0.381658	0.000313293
PPP2R3A	lightcyan	-0.440066	2.50581e-05	-0.514063	4.85154e-07
LOC100507507	lightcyan	0.440043	2.5085e-05	0.589694	2.88286e-09
IGKC	lightcyan	0.439916	2.52356e-05	0.511998	5.48697e-07
LETM2	lightcyan	0.439042	2.63005e-05	0.475383	4.27568e-06
NREP	lightcyan	0.438985	2.63705e-05	0.628484	1.1978e-10
LSP1	lightcyan	-0.438806	2.65947e-05	-0.525368	2.43766e-07
APOO	lightcyan	0.438179	2.73916e-05	0.389475	0.000229408
LINC00900	lightcyan	-0.438121	2.74672e-05	-0.530888	1.72593e-07
C10orf91	lightcyan	0.437636	2.81004e-05	0.497435	1.27759e-06
RPS15A	lightcyan	-0.437553	2.82095e-05	-0.5965	1.70092e-09
PAQR6	lightcyan	-0.437434	2.83684e-05	-0.434724	3.21996e-05
LOC101929112	lightcyan	-0.43719	2.86948e-05	-0.419172	6.52763e-05
LINC01116	lightcyan	0.436726	2.93254e-05	0.580266	5.87009e-09
CRY2	lightcyan	-0.436595	2.95059e-05	-0.55868	2.75421e-08
CYP3A7-CYP3AP1	lightcyan	-0.436543	2.95781e-05	-0.544485	7.17941e-08
RP11-363E7.4	lightcyan	-0.435968	3.03844e-05	-0.539113	1.02003e-07
CAB39	lightcyan	0.435447	3.11336e-05	0.545118	6.8857e-08
KIAA1644	lightcyan	0.435424	3.11671e-05	0.64938	1.78385e-11
TINCR	lightcyan	-0.435367	3.12497e-05	-0.72883	2.63209e-15
MAB21L3	lightcyan	-0.434144	3.30804e-05	-0.597556	1.56554e-09
ERBB3	lightcyan	-0.433673	3.38127e-05	-0.712171	2.13787e-14
CYP2S1	lightcyan	0.433478	3.412e-05	0.522291	2.9472e-07
TEX101	lightcyan	0.433064	3.47798e-05	0.482665	2.89595e-06
LOC100506314	lightcyan	-0.432003	3.65298e-05	-0.440816	2.41827e-05
LOC100287221	lightcyan	0.431368	3.76145e-05	0.49184	1.74981e-06
TGIF2	lightcyan	0.431273	3.77797e-05	0.554657	3.62983e-08
LINC00094	lightcyan	0.431076	3.81233e-05	0.472854	4.88519e-06
ETV7	lightcyan	-0.43075	3.86999e-05	-0.560086	2.49865e-08
C15orf61	lightcyan	-0.430694	3.88006e-05	-0.556589	3.18058e-08
HIF1AN	lightcyan	-0.430446	3.92441e-05	-0.456025	1.15467e-05
CYB561D1	lightcyan	-0.43023	3.96358e-05	-0.610663	5.44845e-10
TTC32	lightcyan	-0.430091	3.9889e-05	-0.48421	2.66317e-06
UBQLN2	lightcyan	0.430087	3.98958e-05	0.397021	0.000168551
TUSC3	lightcyan	0.42988	4.02772e-05	0.511095	5.7888e-07
POLR3K	lightcyan	0.429819	4.03905e-05	0.47503	4.3564e-06
KIF26B	lightcyan	0.429559	4.08734e-05	0.552535	4.19264e-08
AF198444	lightcyan	0.429467	4.10467e-05	0.347086	0.00113633
AK6	lightcyan	0.429253	4.14501e-05	0.379162	0.000345511
PKP2	lightcyan	0.427784	4.43274e-05	0.445288	1.95295e-05
RRAGD	lightcyan	-0.427755	4.43843e-05	-0.473825	4.64203e-06
TREM2	lightcyan	0.42678	4.63984e-05	0.543112	7.85838e-08
VNN1	lightcyan	0.426029	4.80044e-05	0.446111	1.87702e-05
RP4-781L3.1	lightcyan	0.425954	4.81694e-05	0.54223	8.32626e-08
PLAT	lightcyan	0.42563	4.88794e-05	0.447912	1.72031e-05
FAM171B	lightcyan	-0.42503	5.02231e-05	-0.347806	0.00110786
PSMC2	lightcyan	-0.424872	5.05835e-05	-0.507543	7.1355e-07
EFS	lightcyan	-0.42467	5.1048e-05	-0.693236	1.94532e-13
DIRC2	lightcyan	-0.424484	5.14765e-05	-0.426711	4.65428e-05
NPEPPS	lightcyan	0.424359	5.17676e-05	0.357428	0.00078452
LINC00520	lightcyan	0.424315	5.1871e-05	0.387383	0.000249551
SLC35B4	lightcyan	0.42424	5.20461e-05	0.58293	4.81279e-09
RAPGEF1	lightcyan	0.423766	5.31696e-05	0.543672	7.57438e-08
PDGFRB	lightcyan	0.423652	5.34413e-05	0.54294	7.94757e-08
IGHM	lightcyan	0.423601	5.35651e-05	0.540619	9.24946e-08
ARHGEF37	lightcyan	-0.422276	5.68461e-05	-0.613458	4.32332e-10
PLEKHO2	lightcyan	0.42227	5.68603e-05	0.55856	2.7772e-08
BCMO1	lightcyan	-0.421976	5.76123e-05	-0.504075	8.7327e-07
COQ7	lightcyan	0.421908	5.77894e-05	0.369218	0.000506409
MPV17	lightcyan	0.421146	5.97888e-05	0.456759	1.11315e-05
MAN2A1	lightcyan	0.420999	6.0184e-05	0.48241	2.93626e-06
SRPX2	lightcyan	0.420686	6.10288e-05	0.460872	9.05448e-06
NANOS1	lightcyan	0.419759	6.3598e-05	0.490366	1.89923e-06
CYP2J2	lightcyan	-0.419555	6.4176e-05	-0.477354	3.8512e-06
NEFM	lightcyan	0.41952	6.42752e-05	0.564566	1.8267e-08
LUM	lightcyan	0.419152	6.53331e-05	0.62031	2.4283e-10
BMPR1B	lightcyan	0.41908	6.55416e-05	0.47115	5.3408e-06
ARSJ	lightcyan	0.418349	6.76979e-05	0.564467	1.83952e-08
TPSAB1	lightcyan	0.417508	7.02602e-05	0.439276	2.60117e-05
PNLIPRP2	lightcyan	-0.415695	7.60923e-05	-0.409595	9.9175e-05
OAZ3	lightcyan	0.415123	7.80236e-05	0.364694	0.000600214
FSD1L	lightcyan	0.414818	7.90728e-05	0.546646	6.22276e-08
USP51	lightcyan	-0.414794	7.91535e-05	-0.470361	5.56511e-06
ANGPT2	lightcyan	0.414642	7.96817e-05	0.553888	3.82495e-08
CPEB3	lightcyan	-0.414618	7.97666e-05	-0.568284	1.40358e-08
SH2D2A	lightcyan	0.414383	8.05902e-05	0.563402	1.98253e-08
GALNT14	lightcyan	0.414225	8.11478e-05	0.557598	2.96753e-08
KIAA1217	lightcyan	0.414133	8.14735e-05	0.507685	7.07653e-07
LOC200830	lightcyan	-0.414035	8.1822e-05	-0.499316	1.14797e-06
TOR1B	lightcyan	0.413925	8.22153e-05	0.441182	2.37656e-05
FLJ36848	lightcyan	0.413458	8.39065e-05	0.476272	4.07904e-06
WISP1	lightcyan	0.413446	8.39494e-05	0.621421	2.20848e-10
SHISA5	lightcyan	0.413379	8.41949e-05	0.535796	1.26319e-07
IFNE	lightcyan	0.4125	8.74752e-05	0.509381	6.40548e-07
LINC00959	lightcyan	-0.412419	8.77822e-05	-0.470388	5.55719e-06
ACP2	lightcyan	0.411906	8.97579e-05	0.496231	1.36776e-06
HOOK3	lightcyan	-0.411824	9.00788e-05	-0.409996	9.74808e-05
RP3-508I15.21	lightcyan	0.411413	9.16934e-05	0.328562	0.00214019
SYAP1	lightcyan	0.41133	9.20235e-05	0.521775	3.042e-07
SST	lightcyan	0.411161	9.2698e-05	0.424781	5.07919e-05
CCDC88C	lightcyan	0.41112	9.28655e-05	0.466742	6.7119e-06
IL6R	lightcyan	0.410414	9.57379e-05	0.501433	1.017e-06
PTP4A1	lightcyan	0.409596	9.917e-05	0.529059	1.93654e-07
FYCO1	lightcyan	-0.409222	0.00010078	-0.551113	4.61531e-08
GPR176	lightcyan	0.408951	0.000101959	0.552855	4.10281e-08
THAP5	lightcyan	-0.40882	0.000102532	-0.518939	3.61642e-07
GLO1	lightcyan	0.408155	0.000105499	0.419725	6.36932e-05
MSTO1	lightcyan	0.40802	0.000106111	0.397754	0.000163514
HAPLN3	lightcyan	0.407869	0.000106797	0.637017	5.60065e-11
IGLL5	lightcyan	0.40737	0.000109101	0.479037	3.52027e-06
KDM5D	lightcyan	-0.407277	0.000109537	-0.443044	2.17478e-05
PELI3	lightcyan	-0.40676	0.00011198	-0.474456	4.49041e-06
NID2	lightcyan	0.406589	0.000112797	0.650721	1.57069e-11
CDC27	lightcyan	0.406395	0.000113734	0.52248	2.9131e-07
LAYN	lightcyan	0.406165	0.000114856	0.584936	4.13915e-09
KLHL6	lightcyan	0.406108	0.000115135	0.651925	1.40038e-11
EMC3	lightcyan	-0.406069	0.000115325	-0.521305	3.13072e-07
ZNF439	lightcyan	-0.405968	0.000115823	-0.566106	1.63847e-08
FAM122A	lightcyan	-0.405944	0.000115937	-0.590045	2.80636e-09
OTUD1	lightcyan	-0.405423	0.000118535	-0.391091	0.000214885
ZNF114	lightcyan	0.405344	0.000118932	0.384581	0.000279084
LOC102723479	lightcyan	0.404857	0.000121416	0.518436	3.72858e-07
MIR31HG	lightcyan	0.404797	0.000121721	0.544776	7.04296e-08
RASSF8	lightcyan	0.40436	0.000123997	0.580289	5.86001e-09
AGPS	lightcyan	0.404285	0.00012439	0.603659	9.63426e-10
SLC6A15	lightcyan	0.403214	0.000130147	0.559896	2.53184e-08
IGLV1-44	lightcyan	0.402232	0.000135637	0.483671	2.74229e-06
MSMB	lightcyan	-0.402097	0.000136412	-0.417934	6.89519e-05
PCF11	lightcyan	-0.401756	0.000138376	-0.552404	4.23017e-08
SLC25A28	lightcyan	0.400735	0.000144426	0.4598	9.55788e-06
ZNF155	lightcyan	-0.400707	0.000144598	-0.364884	0.000595965
SNX16	lightcyan	-0.400517	0.00014575	-0.49851	1.20196e-06
OCIAD2	lightcyan	0.400342	0.000146819	0.521786	3.03997e-07
EMR2	lightcyan	0.400209	0.000147634	0.564363	1.85306e-08
GJC1	lightcyan	0.399748	0.000150503	0.55412	3.76517e-08
EPB41	lightcyan	-0.399621	0.000151304	-0.627698	1.28315e-10
RALGPS2	lightcyan	-0.399427	0.000152529	-0.598239	1.48343e-09
ITGAM	lightcyan	-0.399381	0.000152823	-0.394897	0.000183966
CDK20	lightcyan	-0.399065	0.00015485	-0.509514	6.35538e-07
SPTY2D1-AS1	lightcyan	-0.398655	0.000157512	-0.509687	6.29097e-07
TRAF3IP3	lightcyan	0.397881	0.000162651	0.518048	3.81731e-07
DHRS4-AS1	lightcyan	-0.397581	0.000164688	-0.393724	0.000193022
NEFL	lightcyan	0.396841	0.000169808	0.612639	4.62775e-10
BASP1	lightcyan	0.396615	0.000171396	0.589785	2.86283e-09
GREM1	lightcyan	0.39643	0.000172714	0.591738	2.46361e-09
CHN1	lightcyan	0.396382	0.000173059	0.622336	2.04189e-10
RAPGEF3	lightcyan	0.395993	0.000175857	0.340033	0.00145266
APOOL	lightcyan	-0.39554	0.000179165	-0.511184	5.75841e-07
PRKCQ-AS1	lightcyan	0.395479	0.000179616	0.65071	1.57233e-11
MAP3K5	lightcyan	0.395297	0.000180962	0.322468	0.00261398
UCN2	lightcyan	0.395046	0.00018284	0.403993	0.000125938
RAG1	lightcyan	0.394906	0.000183897	0.487879	2.1788e-06
RNF8	lightcyan	0.394688	0.000185552	0.448069	1.70724e-05
TGFB2	lightcyan	0.394501	0.000186976	0.558448	2.79868e-08
RNF145	lightcyan	0.394455	0.000187329	0.559034	2.68764e-08
WDR45B	lightcyan	0.394308	0.000188465	0.447769	1.73228e-05
TOMM34	lightcyan	0.39427	0.00018876	0.407436	0.000108796
SH3YL1	lightcyan	-0.394261	0.000188827	-0.595948	1.77611e-09
CD37	lightcyan	0.394202	0.000189281	0.581668	5.28878e-09
FAH	lightcyan	0.394191	0.000189366	0.478854	3.55502e-06
GLI3	lightcyan	0.393885	0.000191761	0.482875	2.86324e-06
TTC37	lightcyan	-0.393719	0.000193066	-0.496105	1.37752e-06
IFITM3	lightcyan	0.393689	0.000193298	0.538906	1.03382e-07
PI15	lightcyan	0.393414	0.000195489	0.562018	2.18422e-08
OTUD6B-AS1	lightcyan	-0.393343	0.000196052	-0.411673	9.06698e-05
GPR161	lightcyan	0.393301	0.000196389	0.496597	1.33974e-06
PRSS21	lightcyan	0.393001	0.000198814	0.414766	7.92516e-05
SMIM3	lightcyan	0.392901	0.00019963	0.58786	3.31657e-09
MCC	lightcyan	-0.392673	0.000201492	-0.401398	0.000140469
TSTD1	lightcyan	-0.392395	0.000203792	-0.610808	5.38392e-10
GP1BA	lightcyan	-0.39216	0.000205749	-0.415131	7.79946e-05
LOC101928504	lightcyan	-0.392105	0.000206212	-0.417256	7.10447e-05
HTRA2	lightcyan	0.391953	0.000207485	0.319154	0.00290932
LAMA5	lightcyan	0.391942	0.000207581	0.301983	0.00497234
LEMD1	lightcyan	0.391061	0.000215146	0.402678	0.000133116
PDK3	lightcyan	-0.390786	0.000217558	-0.357466	0.000783454
NUPR1	lightcyan	-0.390333	0.000221587	-0.628553	1.19055e-10
LFNG	lightcyan	-0.389333	0.000230722	-0.362502	0.000651159
SEC22A	lightcyan	-0.389221	0.00023177	-0.412276	8.83289e-05
FCGBP	lightcyan	-0.389069	0.000233197	-0.555171	3.50483e-08
WDR43	lightcyan	0.388554	0.000238078	0.423516	5.37707e-05
PBX1	lightcyan	-0.388256	0.000240957	-0.416339	7.39709e-05
CCDC28A	lightcyan	-0.387987	0.000243576	-0.359018	0.000740263
C7orf43	lightcyan	-0.387902	0.000244404	-0.500497	1.07309e-06
LOC648987	lightcyan	0.38779	0.000245507	0.512636	5.28273e-07
SQRDL	lightcyan	0.387675	0.000246644	0.541274	8.86299e-08
PNPLA1	lightcyan	-0.387415	0.000249231	-0.574544	8.93969e-09
COCH	lightcyan	-0.387297	0.000250412	-0.422469	5.63566e-05
PDGFC	lightcyan	0.387095	0.000252445	0.515503	4.45051e-07
CLMN	lightcyan	0.386937	0.000254053	0.331913	0.00191406
TMEM200B	lightcyan	-0.386205	0.0002616	-0.615431	3.66687e-10
RPS23	lightcyan	-0.385944	0.000264343	-0.399723	0.000150664
NOA1	lightcyan	-0.385827	0.000265577	-0.520532	3.28223e-07
LOC101929243	lightcyan	-0.385581	0.000268197	-0.459911	9.5045e-06
NDUFV2-AS1	lightcyan	-0.38547	0.000269381	-0.460098	9.41547e-06
STEAP1	lightcyan	0.385329	0.000270903	0.560652	2.40232e-08
SUSD1	lightcyan	0.384999	0.000274487	0.451678	1.43149e-05
PDLIM1	lightcyan	0.384892	0.000275657	0.515157	4.54383e-07
LINC00337	lightcyan	0.383654	0.000289538	0.431005	3.82486e-05
LOC729680	lightcyan	0.383417	0.000292269	0.340602	0.00142449
ZBTB22	lightcyan	-0.383325	0.000293337	-0.384132	0.000284102
F2RL2	lightcyan	0.383003	0.000297096	0.597724	1.54488e-09
SMCR5	lightcyan	-0.382636	0.000301441	-0.399209	0.000153925
RP1-30M3.5	lightcyan	-0.382376	0.000304549	-0.400391	0.000146515
TRMT12	lightcyan	0.382348	0.000304893	0.456247	1.14198e-05
ZNFX1	lightcyan	0.382032	0.000308712	0.419953	6.30507e-05
HDAC4	lightcyan	-0.381344	0.000317185	-0.376283	0.000386442
KCTD6	lightcyan	-0.381067	0.000320668	-0.379245	0.00034439
NPIPB15	lightcyan	-0.38062	0.000326336	-0.595659	1.81667e-09
CEBPA-AS1	lightcyan	-0.380427	0.000328818	-0.5382	1.08207e-07
DQ592442	lightcyan	-0.379911	0.000335536	-0.424131	5.23028e-05
PCID2	lightcyan	0.379787	0.000337175	0.330548	0.00200344
CACNA2D1	lightcyan	-0.379771	0.000337383	-0.431698	3.70477e-05
TNFRSF11B	lightcyan	0.379049	0.000347046	0.476896	3.94615e-06
KAT6B	lightcyan	-0.378906	0.000348981	-0.42785	4.41933e-05
VPRBP	lightcyan	-0.378887	0.000349241	-0.431181	3.79405e-05
TREM1	lightcyan	0.37776	0.000364919	0.441268	2.36693e-05
GIPC2	lightcyan	-0.377633	0.000366725	-0.612825	4.55674e-10
MYLIP	lightcyan	-0.377507	0.000368518	-0.478147	3.6918e-06
TGFB3	lightcyan	0.37747	0.000369053	0.626052	1.48122e-10
MBNL3	lightcyan	-0.377058	0.000375009	-0.508231	6.85363e-07
KANK4	lightcyan	0.376738	0.000379686	0.434423	3.26551e-05
SRCIN1	lightcyan	-0.37642	0.000384388	-0.572329	1.04986e-08
LOC101928424	lightcyan	-0.376314	0.000385981	-0.560381	2.44807e-08
FAM126B	lightcyan	-0.376192	0.000387807	-0.387143	0.000251958
EFTUD1	lightcyan	0.376132	0.000388695	0.445959	1.8908e-05
EDNRA	lightcyan	0.375552	0.000397514	0.639093	4.63857e-11
KRT75	lightcyan	0.375398	0.000399891	0.527575	2.12494e-07
ATG16L2	lightcyan	-0.37508	0.000404816	-0.515274	4.51218e-07
STARD4	lightcyan	0.374156	0.000419483	0.568447	1.38736e-08
GLIPR1	lightcyan	0.373765	0.000425831	0.625615	1.53854e-10
RBBP6	lightcyan	-0.373684	0.00042716	-0.402965	0.000131518
TIMP1	lightcyan	0.373624	0.000428146	0.542161	8.36391e-08
GPR110	lightcyan	0.373464	0.000430774	0.299171	0.00541273
LOC101929648	lightcyan	-0.373344	0.000432768	-0.353529	0.000903456
THBS1	lightcyan	0.373336	0.000432894	0.57907	6.41368e-09
ARHGEF3	lightcyan	0.373304	0.00043343	0.402638	0.000133341
SNAPC1	lightcyan	0.372736	0.000442955	0.471399	5.27189e-06
TRAM2	lightcyan	0.37253	0.00044647	0.545918	6.53072e-08
ESM1	lightcyan	0.372232	0.000451569	0.429569	4.08553e-05
UTY	lightcyan	-0.372167	0.000452706	-0.51744	3.9602e-07
PLEKHA5	lightcyan	-0.371882	0.000457647	-0.506801	7.4519e-07
CDK14	lightcyan	0.369424	0.000502475	0.475916	4.15687e-06
MIEF1	lightcyan	0.36937	0.000503502	0.481941	3.01163e-06
ACCS	lightcyan	-0.369353	0.000503829	-0.441584	2.33164e-05
BTBD16	lightcyan	-0.369232	0.000506137	-0.572545	1.03354e-08
HOXD11	lightcyan	0.369009	0.000510422	0.531757	1.63378e-07
ACKR3	lightcyan	0.368977	0.000511036	0.462735	8.2389e-06
NOP14	lightcyan	0.368921	0.000512123	0.396446	0.000172597
KLF9	lightcyan	-0.368824	0.000514005	-0.318584	0.002963
GLT1D1	lightcyan	-0.367912	0.000532004	-0.421828	5.79957e-05
GSTO1	lightcyan	0.367668	0.000536912	0.6028	1.03218e-09
RAP2C-AS1	lightcyan	-0.367422	0.000541904	-0.454691	1.23373e-05
CA2	lightcyan	0.366455	0.000561956	0.28081	0.00923538
ZNF615	lightcyan	-0.366408	0.000562939	-0.523329	2.76498e-07
HHAT	lightcyan	-0.366333	0.000564543	-0.417593	6.99961e-05
CPPED1	lightcyan	0.366267	0.000565939	0.538027	1.09428e-07
PCDH17	lightcyan	0.365994	0.000571759	0.539842	9.72934e-08
SLC25A13	lightcyan	0.365772	0.000576527	0.40699	0.000110887
FUT4	lightcyan	0.365052	0.000592246	0.559897	2.53172e-08
TVP23C	lightcyan	0.364474	0.000605154	0.407266	0.000109586
CXCL2	lightcyan	0.364296	0.00060917	0.486387	2.36484e-06
WDR63	lightcyan	-0.364183	0.000611748	-0.352009	0.000954094
IL20	lightcyan	0.364102	0.000613588	0.404185	0.000124915
ACSF2	lightcyan	-0.364096	0.00061373	-0.415332	7.73135e-05
MLPH	lightcyan	-0.363491	0.000627694	-0.387155	0.000251843
MAP4K4	lightcyan	0.36335	0.000631001	0.640599	4.04204e-11
PLAA	lightcyan	-0.363227	0.000633869	-0.399614	0.000151346
RBP7	lightcyan	-0.363218	0.000634102	-0.529743	1.8551e-07
FOXO4	lightcyan	-0.363031	0.000638504	-0.550853	4.69702e-08
CAMK2N2	lightcyan	0.362818	0.000643572	0.372456	0.00044772
CCDC121	lightcyan	-0.362701	0.000646365	-0.491142	1.81909e-06
DAAM1	lightcyan	-0.362571	0.000649484	-0.522732	2.8684e-07
TCP11L2	lightcyan	-0.362269	0.000656793	-0.447468	1.75775e-05
GSE1	lightcyan	-0.362233	0.000657671	-0.565456	1.71563e-08
FKBP9	lightcyan	0.361873	0.000666483	0.462257	8.44131e-06
PDE3A	lightcyan	0.361833	0.000667452	0.560298	2.46223e-08
ZNRF3	lightcyan	-0.361819	0.000667806	-0.335448	0.00169902
LINC00911	lightcyan	0.361808	0.000668081	0.500192	1.09199e-06
DNAJB4	lightcyan	-0.361768	0.000669077	-0.399366	0.00015292
ADPGK	lightcyan	0.361277	0.000681304	0.506511	7.57913e-07
CTDSPL	lightcyan	-0.36118	0.000683735	-0.536408	1.21452e-07
CREB3L4	lightcyan	-0.36109	0.000686018	-0.394587	0.000186321
BEND6	lightcyan	0.360732	0.000695132	0.449366	1.60292e-05
TM2D2	lightcyan	0.360513	0.000700743	0.484726	2.58934e-06
NVL	lightcyan	-0.360109	0.000711246	-0.582276	5.05396e-09
NES	lightcyan	0.359255	0.000733884	0.482028	2.99744e-06
ARF4	lightcyan	0.359104	0.000737949	0.477553	3.81064e-06
APLP2	lightcyan	0.359059	0.000739157	0.410901	9.37474e-05
LOC101930415	lightcyan	-0.358595	0.000751826	-0.506956	7.38491e-07
LINC00162	lightcyan	0.358525	0.000753758	0.399927	0.000149384
LOC101928968	lightcyan	-0.358313	0.000759612	-0.405632	0.000117489
AGPAT4	lightcyan	0.358229	0.000761936	0.486449	2.3568e-06
KIRREL	lightcyan	0.358195	0.000762885	0.636088	6.09099e-11
PRR5	lightcyan	0.357997	0.000768421	0.429402	4.11698e-05
TEAD2	lightcyan	0.357579	0.00078023	0.57499	8.65399e-09
ARL6	lightcyan	-0.357543	0.00078125	-0.421075	5.99786e-05
ANAPC15	lightcyan	0.356331	0.000816471	0.479253	3.47985e-06
FERMT3	lightcyan	0.356319	0.000816829	0.467758	6.36941e-06
FMNL3	lightcyan	0.356155	0.000821699	0.614922	3.82652e-10
DDIT4	lightcyan	0.356035	0.000825269	0.454296	1.2581e-05
FJX1	lightcyan	0.355788	0.000832702	0.505338	8.11548e-07
LIPA	lightcyan	0.355195	0.000850764	0.572075	1.0693e-08
ERICH5	lightcyan	-0.355174	0.00085142	-0.345997	0.0011807
PITPNA-AS1	lightcyan	-0.355129	0.000852808	-0.431155	3.79853e-05
NAMPT	lightcyan	0.354514	0.000871943	0.474115	4.57167e-06
OXSR1	lightcyan	0.354325	0.000877928	0.464183	7.65281e-06
C7orf49	lightcyan	0.353949	0.000889903	0.61305	4.47237e-10
DACT1	lightcyan	0.353782	0.000895282	0.502994	9.29551e-07
IL6	lightcyan	0.353586	0.000901607	0.423571	5.36361e-05
GPR115	lightcyan	-0.353142	0.000916117	-0.581993	5.16194e-09
CDC37L1	lightcyan	-0.352961	0.000922083	-0.460761	9.10538e-06
FAAH2	lightcyan	-0.352621	0.000933414	-0.489718	1.96854e-06
CPAMD8	lightcyan	-0.352288	0.000944596	-0.344912	0.00122646
ABLIM3	lightcyan	0.35217	0.000948615	0.422477	5.6336e-05
SLC39A7	lightcyan	0.352106	0.000950797	0.531138	1.69894e-07
PERP	lightcyan	-0.352098	0.000951045	-0.497143	1.29898e-06
COL27A1	lightcyan	0.351942	0.000956387	0.492656	1.6719e-06
WNT10B	lightcyan	-0.351851	0.000959502	-0.37941	0.000342182
ATL2	lightcyan	-0.351773	0.000962188	-0.45946	9.72309e-06
PPFIA4	lightcyan	0.351394	0.000975305	0.385165	0.000272678
PCBD2	lightcyan	0.351121	0.000984857	0.36194	0.000664837
TRIP4	lightcyan	0.35099	0.000989467	0.439688	2.55092e-05
COL8A1	lightcyan	0.35084	0.000994782	0.551986	4.35148e-08
LOC101927143	lightcyan	-0.350378	0.00101131	-0.543925	7.44926e-08
TRIM33	lightcyan	-0.349487	0.00104386	-0.514165	4.82194e-07
RNF43	lightcyan	-0.349204	0.00105436	-0.429883	4.02722e-05
GUCY1B3	lightcyan	0.349069	0.00105944	0.560994	2.34588e-08
HCG4	lightcyan	0.348853	0.00106759	0.443314	2.14695e-05
LRP2BP	lightcyan	-0.348314	0.00108814	-0.382066	0.000308298
HEY2	lightcyan	0.348174	0.00109354	0.518919	3.62097e-07
TP53	lightcyan	-0.348155	0.00109426	-0.422695	5.5788e-05
LOC100506691	lightcyan	0.348087	0.0010969	0.378974	0.000348064
LOC100505666	lightcyan	-0.347466	0.00112123	-0.449799	1.56935e-05
NSMCE1	lightcyan	0.347445	0.00112206	0.306811	0.00429018
MLKL	lightcyan	0.347358	0.00112552	0.505332	8.11796e-07
ARHGAP22	lightcyan	0.345944	0.00118289	0.535287	1.30504e-07
TMEM184B	lightcyan	0.345463	0.00120304	0.594791	1.9441e-09
NFIL3	lightcyan	0.345238	0.00121253	0.490332	1.9028e-06
SGMS2	lightcyan	0.344639	0.0012382	0.288722	0.00736665
SH3BP2	lightcyan	-0.344485	0.00124487	-0.58318	4.72339e-09
C1RL-AS1	lightcyan	0.344443	0.00124673	0.453081	1.33595e-05
TCIRG1	lightcyan	0.34428	0.00125383	0.405758	0.000116858
MED9	lightcyan	-0.344199	0.00125738	-0.286122	0.0079402
NID1	lightcyan	0.344183	0.00125807	0.611748	4.98204e-10
MLLT4-AS1	lightcyan	-0.344017	0.00126538	-0.350876	0.000993524
PC	lightcyan	0.343609	0.00128351	0.430155	3.97723e-05
PAPSS2	lightcyan	0.342195	0.00134814	0.555283	3.478e-08
RBM18	lightcyan	-0.342069	0.00135403	-0.411045	9.31652e-05
FCGR1B	lightcyan	0.341801	0.00136666	0.568359	1.39606e-08
ENC1	lightcyan	0.341681	0.00137238	0.541182	8.91629e-08
RP11-533E19.7	lightcyan	0.341601	0.00137617	0.249284	0.0214082
RBKS	lightcyan	0.341377	0.00138689	0.361315	0.000680338
ADAM19	lightcyan	0.341164	0.00139712	0.564552	1.82853e-08
SLC43A3	lightcyan	0.341146	0.00139799	0.50599	7.81318e-07
IGSF11	lightcyan	-0.340632	0.00142301	-0.436072	3.02377e-05
LMO4	lightcyan	-0.34057	0.00142606	-0.36413	0.000612963
ASPN	lightcyan	0.340398	0.00143455	0.416807	7.24641e-05
SPRY4-IT1	lightcyan	0.339561	0.00147645	0.392748	0.000200876
LIPT1	lightcyan	-0.339508	0.00147916	-0.407821	0.000107019
ISL1	lightcyan	-0.339202	0.00149479	-0.308389	0.004086
LOC100505501	lightcyan	0.339108	0.00149963	0.516627	4.15942e-07
OPN3	lightcyan	0.338868	0.001512	0.347536	0.00111848
H2AFY	lightcyan	0.338482	0.00153212	0.318398	0.00298069
ITGA1	lightcyan	0.338034	0.00155579	0.556097	3.28969e-08
CMTM6	lightcyan	-0.337925	0.00156159	-0.438593	2.68628e-05
ARL14	lightcyan	0.337662	0.00157569	0.499217	1.15449e-06
DUSP6	lightcyan	0.33757	0.00158065	0.56537	1.72601e-08
KRBOX1	lightcyan	-0.337003	0.00161153	-0.410866	9.38898e-05
CCL4	lightcyan	0.337001	0.00161166	0.460954	9.01708e-06
IL17RD	lightcyan	-0.335566	0.00169222	-0.47242	4.9977e-06
COL22A1	lightcyan	0.33513	0.00171743	0.364538	0.000603708
RGS10	lightcyan	0.335042	0.00172258	0.430345	3.94276e-05
ARR3	lightcyan	-0.335003	0.00172485	-0.440399	2.46648e-05
AC012065.7	lightcyan	-0.334794	0.00173708	-0.560955	2.35225e-08
AHCYL2	lightcyan	-0.334172	0.00177397	-0.247275	0.0225154
CSPG4	lightcyan	0.334153	0.00177511	0.459726	9.59348e-06
PLK2	lightcyan	0.333468	0.0018166	0.536562	1.20257e-07
PCSK1	lightcyan	0.332644	0.00186767	0.52165	3.06533e-07
RNF44	lightcyan	-0.332457	0.00187943	-0.313022	0.00353562
FIGN	lightcyan	-0.332392	0.00188353	-0.361542	0.000674678
NNMT	lightcyan	0.331983	0.00190954	0.561715	2.23099e-08
TFG	lightcyan	0.331982	0.00190961	0.352415	0.000940315
CST1	lightcyan	0.331499	0.00194076	0.419729	6.36811e-05
TCP11L1	lightcyan	0.331332	0.00195167	0.409079	0.000101401
PRKY	lightcyan	-0.33083	0.00198466	-0.397741	0.000163602
RASAL2	lightcyan	-0.330753	0.00198979	-0.41151	9.13125e-05
TRIM37	lightcyan	0.330558	0.00200275	0.358381	0.000757718
MAN1A2	lightcyan	-0.330417	0.00201218	-0.424336	5.18225e-05
MRPL32	lightcyan	0.329722	0.00205933	0.394239	0.000188998
TULP4	lightcyan	-0.329485	0.00207564	-0.350141	0.00101987
ARIH2	lightcyan	0.329232	0.00209313	0.341949	0.0013597
GUCD1	lightcyan	0.329155	0.00209851	0.43404	3.32404e-05
SS18	lightcyan	-0.328965	0.00211182	-0.378459	0.000355122
CPA3	lightcyan	0.328541	0.0021417	0.418115	6.84037e-05
SGCE	lightcyan	0.327581	0.00221084	0.423244	5.44298e-05
GUCY1A3	lightcyan	0.327544	0.00221352	0.609508	5.99125e-10
C16orf72	lightcyan	0.326553	0.0022871	0.481084	3.15404e-06
MICA	lightcyan	0.326403	0.00229835	0.401809	0.000138073
HCK	lightcyan	0.325802	0.00234425	0.391604	0.000210457
LINC00460	lightcyan	0.325741	0.00234895	0.364424	0.000606273
NPTX2	lightcyan	-0.325711	0.00235126	-0.292346	0.00662813
ELK3	lightcyan	0.325673	0.00235421	0.57979	6.08119e-09
UNC5A	lightcyan	0.324654	0.00243415	0.30834	0.00409218
NISCH	lightcyan	-0.323966	0.00248947	-0.549073	5.29325e-08
CPXM1	lightcyan	0.323964	0.00248963	0.55744	2.99997e-08
PPAPDC2	lightcyan	-0.323315	0.00254288	-0.518544	3.70427e-07
MECOM	lightcyan	0.323212	0.00255146	0.492493	1.6872e-06
PRKRA	lightcyan	-0.323187	0.00255351	-0.417045	7.17102e-05
LOC101927278	lightcyan	0.322979	0.00257089	0.410128	9.69281e-05
BC062763	lightcyan	0.322685	0.00259559	0.43514	3.15825e-05
BTG1	lightcyan	-0.322279	0.00263006	-0.428387	4.31235e-05
EIF3J-AS1	lightcyan	-0.322088	0.00264643	-0.364041	0.000614998
AP3B1	lightcyan	0.32198	0.00265569	0.421082	5.99604e-05
ARPIN	lightcyan	-0.32187	0.0026652	-0.351668	0.000965818
HEXA-AS1	lightcyan	-0.321388	0.00270706	-0.465109	7.29883e-06
WSB1	lightcyan	0.321114	0.00273121	0.355844	0.000831002
NR2F1	lightcyan	0.321098	0.00273262	0.395362	0.000180485
GOLIM4	lightcyan	0.320797	0.00275935	0.579782	6.08451e-09
FRAT2	lightcyan	-0.320373	0.00279735	-0.372505	0.000446898
HRASLS	lightcyan	-0.32028	0.00280574	-0.439977	2.5163e-05
RDX	lightcyan	0.320116	0.00282064	0.418443	6.74181e-05
EFNA4	lightcyan	-0.320111	0.00282107	-0.468515	6.12472e-06
AAGAB	lightcyan	0.319302	0.00289552	0.396466	0.000172459
TMEM126A	lightcyan	0.31879	0.00294349	0.3741	0.000420377
COL12A1	lightcyan	0.318699	0.00295208	0.589145	3.00681e-09
RAB20	lightcyan	0.318678	0.00295409	0.444759	2.00326e-05
SCG2	lightcyan	0.318621	0.00295952	0.483382	2.78563e-06
AKR1B1	lightcyan	0.3186	0.00296152	0.481442	3.09372e-06
FAM200B	lightcyan	-0.318331	0.00298716	-0.445792	1.9061e-05
LYSMD4	lightcyan	-0.318262	0.00299372	-0.387484	0.00024854
OSBPL2	lightcyan	-0.318238	0.00299601	-0.576147	7.9524e-09
B4GALT4	lightcyan	-0.318202	0.00299953	-0.359499	0.000727339
KIF21A	lightcyan	-0.318085	0.00301079	-0.408964	0.000101903
TENM2	lightcyan	0.317568	0.00306096	0.583392	4.64894e-09
ZFHX4	lightcyan	0.317318	0.00308548	0.502456	9.58854e-07
PHF23	lightcyan	0.317172	0.00309992	0.513226	5.10012e-07
RLN2	lightcyan	-0.317078	0.0031092	-0.367377	0.000542821
SOWAHA	lightcyan	-0.316739	0.00314305	-0.316722	0.00314472
ABCC4	lightcyan	0.316127	0.00320486	0.457878	1.05262e-05
DYSF	lightcyan	0.315725	0.00324606	0.451616	1.43585e-05
CHSY3	lightcyan	0.3156	0.00325897	0.497402	1.28005e-06
PLCG1-AS1	lightcyan	-0.315289	0.00329124	-0.335191	0.00171387
FLJ25917	lightcyan	0.315242	0.00329621	0.236147	0.0295698
RALGAPA2	lightcyan	-0.314475	0.00337718	-0.453425	1.31349e-05
TTLL11-IT1	lightcyan	0.314399	0.00338536	0.349576	0.00104055
SEMA4C	lightcyan	-0.314025	0.00342561	-0.260396	0.0160901
PTTG1IP	lightcyan	0.313532	0.00347931	0.244094	0.0243675
ZCCHC17	lightcyan	0.313352	0.0034991	0.375527	0.000397902
LOC101927841	lightcyan	0.311641	0.00369234	0.474344	4.51695e-06
C20orf194	lightcyan	0.311577	0.00369976	0.365745	0.000577107
EDN3	lightcyan	-0.310927	0.00377571	-0.32391	0.00249403
ETS1	lightcyan	0.310855	0.00378425	0.587995	3.28262e-09
TMEM173	lightcyan	0.310847	0.00378512	0.550022	4.96678e-08
CCDC92	lightcyan	0.310574	0.0038176	0.539158	1.01707e-07
TEC	lightcyan	-0.310252	0.00385612	-0.397219	0.000167175
TM4SF18	lightcyan	0.310193	0.00386325	0.447954	1.71686e-05
INSIG2	lightcyan	-0.309861	0.00390337	-0.428434	4.3033e-05
TBCE	lightcyan	0.309142	0.00399167	0.328873	0.00211827
IGF2BP3	lightcyan	0.30914	0.00399189	0.245882	0.0233112
PARD6G-AS1	lightcyan	-0.309087	0.00399846	-0.418333	6.77468e-05
SIT1	lightcyan	0.309014	0.0040076	0.456446	1.1307e-05
ZNF746	lightcyan	0.308569	0.00406322	0.416739	7.26806e-05
ERRFI1	lightcyan	0.308429	0.00408093	0.447759	1.73315e-05
AC002059.10	lightcyan	-0.30779	0.00416238	-0.284867	0.00823089
TMEM187	lightcyan	-0.307195	0.00423959	-0.402506	0.000134084
RAB32	lightcyan	0.307048	0.00425888	0.588729	3.10383e-09
GDAP1	lightcyan	0.306973	0.00426882	0.455848	1.16484e-05
LOC728613	lightcyan	0.306757	0.00429726	0.371016	0.00047301
TMC7	lightcyan	0.306723	0.00430181	0.42272	5.57261e-05
FAP	lightcyan	0.306712	0.0043033	0.535126	1.31853e-07
RP11-134G8.8	lightcyan	0.306377	0.00434784	0.41823	6.80573e-05
EVA1A	lightcyan	0.306085	0.00438704	0.405028	0.000120536
SLC44A5	lightcyan	-0.306038	0.00439348	-0.445293	1.95248e-05
FLVCR1-AS1	lightcyan	0.305773	0.00442932	0.324438	0.00245139
LZTS3	lightcyan	0.305764	0.00443054	0.397652	0.000164207
SEC24A	lightcyan	0.305701	0.00443916	0.371065	0.000472125
SMARCAL1	lightcyan	0.305243	0.00450203	0.25421	0.0188893
EOGT	lightcyan	0.305148	0.00451514	0.459392	9.75634e-06
ABCC1	lightcyan	0.30431	0.00463235	0.541357	8.81493e-08
FKBP10	lightcyan	0.303991	0.00467777	0.393365	0.00019588
PDCD6IP	lightcyan	-0.303678	0.00472262	-0.402238	0.000135603
LOC101930405	lightcyan	0.303618	0.00473134	0.359142	0.000736912
KIAA1211L	lightcyan	-0.303374	0.00476659	-0.435614	3.08918e-05
CDH11	lightcyan	0.30336	0.00476855	0.56404	1.89568e-08
EDEM1	lightcyan	0.303337	0.0047719	0.339266	0.00149147
C17orf58	lightcyan	-0.303047	0.0048143	-0.30256	0.00488613
CRYBG3	lightcyan	-0.302925	0.00483213	-0.510894	5.85797e-07
BTBD10	lightcyan	0.302708	0.00486415	0.346761	0.00114941
ID2	lightcyan	-0.302409	0.0049085	-0.281994	0.00893169
CEACAM6	lightcyan	0.302128	0.00495054	0.352689	0.000931141
MAOA	lightcyan	-0.301729	0.00501081	-0.448532	1.66928e-05
PRDM13	lightcyan	-0.301347	0.00506903	-0.312842	0.00355575
IL15RA	lightcyan	0.301282	0.00507907	0.353096	0.000917618
MOP-1	lightcyan	-0.300848	0.00514618	-0.22944	0.0346625
GRP	lightcyan	0.30077	0.00515827	0.399934	0.00014934
FAM114A1	lightcyan	0.299941	0.00528888	0.346779	0.00114867
LOC101928335	lightcyan	-0.299812	0.00530946	-0.367598	0.000538342
CDK6	lightcyan	0.299732	0.00532226	0.421841	5.79616e-05
TPTE2P5	lightcyan	-0.299687	0.00532948	-0.492991	1.64095e-06
TMEM200A	lightcyan	0.299645	0.00533607	0.515172	4.53982e-07
KANSL1-AS1	lightcyan	-0.298959	0.00544728	-0.351678	0.000965468
ZBP1	lightcyan	0.298252	0.00556384	0.383277	0.000293902
LOX	lightcyan	0.297773	0.0056442	0.402073	0.000136549
IGK	lightcyan	0.297773	0.00564426	0.388762	0.000236096
CALB1	lightcyan	0.297458	0.0056975	0.27012	0.0124133
GALNT7	lightcyan	0.297035	0.00576984	0.441793	2.3085e-05
WDYHV1	lightcyan	0.296974	0.00578033	0.442392	2.24359e-05
C12orf43	lightcyan	0.296917	0.00579015	0.371199	0.000469733
HDHD1	lightcyan	0.296515	0.00585999	0.402917	0.000131784
SUDS3	lightcyan	-0.296453	0.00587072	-0.527244	2.16932e-07
SLC13A5	lightcyan	0.296062	0.00593934	0.303151	0.00479912
TEDDM1	lightcyan	-0.295876	0.00597228	-0.364627	0.000601707
LINC01003	lightcyan	-0.295522	0.00603533	-0.42171	5.83016e-05
NUBP1	lightcyan	0.295518	0.00603603	0.475141	4.33076e-06
FFAR4	lightcyan	-0.294791	0.00616742	-0.286751	0.0077979
BCL11B	lightcyan	-0.293671	0.00637493	-0.39585	0.000176892
GFI1	lightcyan	0.293564	0.00639505	0.414965	7.85644e-05
GEMIN6	lightcyan	0.293226	0.00645892	0.281748	0.00899405
KRT24	lightcyan	0.29305	0.00649248	0.344714	0.00123497
HOXD-AS2	lightcyan	0.291231	0.00684796	0.423297	5.43014e-05
SLC1A6	lightcyan	-0.291196	0.00685502	-0.374454	0.000414703
TLR2	lightcyan	0.291177	0.00685881	0.442323	2.25093e-05
RPS29	lightcyan	-0.290332	0.00703011	-0.389894	0.000225557
EGFLAM	lightcyan	0.290153	0.00706668	0.426743	4.64752e-05
ATXN7	lightcyan	-0.290082	0.00708142	-0.385684	0.000267097
TNFAIP8	lightcyan	0.290011	0.00709604	0.235271	0.0301971
SH3RF3	lightcyan	0.289619	0.00717733	0.443181	2.16061e-05
TDRP	lightcyan	0.288509	0.00741219	0.303076	0.00481002
APCDD1L	lightcyan	0.288275	0.00746252	0.298791	0.00547482
NFIC	lightcyan	-0.287824	0.0075605	-0.493108	1.63017e-06
PLAG1	lightcyan	-0.287623	0.00760451	-0.346121	0.00117555
ACER3	lightcyan	0.287359	0.00766259	0.534254	1.39406e-07
BCAT1	lightcyan	0.286579	0.00783675	0.40696	0.000111029
KIF13A	lightcyan	0.286206	0.00792112	0.462945	8.15133e-06
HOXA7	lightcyan	-0.286065	0.00795333	-0.278745	0.00978699
MTMR1	lightcyan	-0.285887	0.00799388	-0.431817	3.68436e-05
EGLN3	lightcyan	0.285789	0.00801654	0.138001	0.20785
NARS2	lightcyan	0.285373	0.00811262	0.339314	0.00148906
SDK2	lightcyan	0.284052	0.00842471	0.523125	2.79999e-07
NPFF	lightcyan	-0.28395	0.00844913	-0.319277	0.00289785
SPATA2L	lightcyan	-0.283722	0.00850432	-0.312907	0.00354849
LINC00839	lightcyan	0.283267	0.00861491	0.321322	0.00271289
IGLJ3	lightcyan	0.283252	0.0086187	0.368571	0.000518943
TNFAIP6	lightcyan	0.283007	0.00867898	0.507165	7.29529e-07
PLAC8L1	lightcyan	-0.282234	0.00887118	-0.293156	0.00647224
CXCL5	lightcyan	0.281646	0.00902015	0.257894	0.0171758
MRPS6	lightcyan	0.281581	0.00903666	0.448765	1.65052e-05
AGFG1	lightcyan	0.28071	0.00926145	0.309592	0.0039362
CST4	lightcyan	0.280124	0.00941552	0.385631	0.000267659
EYA2	lightcyan	-0.279923	0.00946886	-0.269813	0.0125172
ERMARD	lightcyan	0.279721	0.00952275	0.283321	0.00860189
TCHP	lightcyan	-0.279592	0.00955735	-0.508629	6.69521e-07
JPH1	lightcyan	0.279239	0.00965253	0.363284	0.000632546
KHDRBS3	lightcyan	0.27898	0.00972273	0.336594	0.00163417
LIAS	lightcyan	-0.278306	0.00990788	-0.414468	8.02894e-05
PPP1R3C	lightcyan	0.278027	0.00998539	0.382972	0.000297461
HECTD3	lightcyan	-0.27686	0.0103151	-0.473227	4.79046e-06
GRIA3	lightcyan	0.276634	0.0103801	0.446458	1.84582e-05
SHROOM2	lightcyan	0.276336	0.0104665	0.289897	0.00711951
GYG1	lightcyan	0.276235	0.0104957	0.373633	0.000427999
PRSS16	lightcyan	-0.275748	0.0106385	-0.334756	0.00173929
ABHD15	lightcyan	0.275494	0.0107133	0.348577	0.00107807
TIPARP	lightcyan	0.27512	0.0108249	0.2405	0.0266149
DDX10	lightcyan	0.275004	0.0108595	0.290951	0.00690426
MORC4	lightcyan	-0.274947	0.0108767	-0.355057	0.000855029
DSC3	lightcyan	-0.274534	0.0110012	-0.492231	1.71207e-06
LOC727916	lightcyan	0.274322	0.0110659	0.259962	0.0162739
RAB29	lightcyan	0.274167	0.0111132	0.44624	1.86536e-05
SCRN1	lightcyan	0.273589	0.0112912	0.398032	0.000161637
KIAA0391	lightcyan	-0.273132	0.0114337	-0.359082	0.000738547
FAM221A	lightcyan	-0.271668	0.0119012	-0.477253	3.87184e-06
UBE2Z	lightcyan	0.271318	0.0120151	0.454559	1.24185e-05
PLEKHO1	lightcyan	0.271004	0.0121185	0.441965	2.28973e-05
PLEKHA2	lightcyan	0.270822	0.0121787	0.426213	4.7606e-05
ECRP	lightcyan	-0.270761	0.0121989	-0.371735	0.00046022
LRFN1	lightcyan	-0.270658	0.012233	-0.366082	0.000569872
BPGM	lightcyan	0.270061	0.0124333	0.535519	1.2858e-07
TNFAIP3	lightcyan	0.270028	0.0124444	0.403495	0.000128614
SMG8	lightcyan	0.268923	0.0128224	0.31698	0.00311893
NR2E1	lightcyan	0.268231	0.0130641	0.344775	0.00123234
RNASE2	lightcyan	-0.267572	0.0132982	-0.323757	0.00250656
FMNL1	lightcyan	0.267107	0.0134652	0.396844	0.000169783
FLT1	lightcyan	0.266223	0.0137881	0.294601	0.00620233
GNGT1	lightcyan	0.265579	0.0140279	0.293012	0.00649969
THEMIS2	lightcyan	0.265333	0.0141201	0.346914	0.00114325
PIM2	lightcyan	0.265325	0.0141233	0.34844	0.00108331
C12orf73	lightcyan	0.264616	0.0143925	0.157267	0.150599
SOSTDC1	lightcyan	-0.264381	0.0144829	-0.314667	0.0033568
LOC100506469	lightcyan	-0.264286	0.0145194	-0.302193	0.00494079
KDELR3	lightcyan	0.263857	0.0146859	0.438866	2.65196e-05
SPINK1	lightcyan	-0.263251	0.0149241	-0.322987	0.00257025
BLVRA	lightcyan	0.263223	0.0149349	0.359245	0.00073415
SMIM14	lightcyan	-0.263131	0.0149715	-0.34651	0.00115963
HOXD10	lightcyan	0.262794	0.0151053	0.431057	3.81568e-05
DDIT3	lightcyan	0.26243	0.0152515	0.216987	0.046072
LOC101928487	lightcyan	0.262056	0.0154027	0.339888	0.00145996
USP9Y	lightcyan	-0.261036	0.0158222	-0.313665	0.00346471
TOPORS	lightcyan	-0.260778	0.0159297	-0.383283	0.000293829
AFAP1-AS1	lightcyan	0.260635	0.0159896	0.308024	0.0041324
C1orf52	lightcyan	-0.260274	0.0161416	-0.344474	0.00124534
PP12719	lightcyan	-0.258625	0.0168525	-0.315025	0.00331894
TSEN54	lightcyan	-0.258563	0.0168798	-0.371336	0.000467273
RP11-38P22.2	lightcyan	-0.258462	0.0169241	-0.29183	0.00672917
CCDC17	lightcyan	0.257861	0.0171908	0.232342	0.0323752
MAGED2	lightcyan	0.257297	0.0174442	0.317515	0.00306616
ZNF143	lightcyan	0.255724	0.0181684	0.270415	0.0123141
HSD17B8	lightcyan	-0.255409	0.0183162	-0.373233	0.000434601
SERPINE2	lightcyan	0.255409	0.0183163	0.515945	4.33383e-07
HSPH1	lightcyan	0.254968	0.0185254	0.462515	8.33137e-06
LOC100132167	lightcyan	-0.254951	0.0185334	-0.166957	0.126706
FASTKD1	lightcyan	0.254683	0.0186615	0.325072	0.00240106
COG7	lightcyan	-0.253835	0.0190716	-0.328713	0.0021295
RPRML	lightcyan	-0.253298	0.0193356	-0.459379	9.76248e-06
WDR47	lightcyan	-0.252143	0.0199134	-0.438129	2.74569e-05
OSBPL3	lightcyan	0.251722	0.0201281	0.333066	0.00184133
SYT11	lightcyan	0.251266	0.0203621	0.399922	0.000149415
SIKE1	lightcyan	-0.25123	0.0203808	-0.410409	9.57584e-05
GDAP2	lightcyan	-0.251192	0.0204007	-0.367958	0.000531078
ERVMER34-1	lightcyan	0.251161	0.0204163	0.409359	0.000100187
RP5-935K16.1	lightcyan	-0.251123	0.0204361	-0.377072	0.000374799
IMMP1L	lightcyan	-0.251039	0.0204797	-0.312316	0.00361498
POP1	lightcyan	0.250991	0.020505	0.280298	0.00936967
TXLNGY	lightcyan	-0.250797	0.0206057	-0.303575	0.00473754
DUSP12	lightcyan	0.249853	0.0211034	0.39721	0.000167237
MYCL	lightcyan	-0.249805	0.0211289	-0.479264	3.47793e-06
BCHE	lightcyan	-0.249335	0.021381	-0.232829	0.0320043
SMAD7	lightcyan	0.249146	0.0214828	0.3874	0.000249383
CYTH1	lightcyan	0.248974	0.0215762	0.426879	4.61903e-05
CYB5D2	lightcyan	-0.248794	0.021674	-0.268897	0.0128312
TRIM6	lightcyan	0.248732	0.0217079	0.424369	5.17455e-05
ELP4	lightcyan	-0.24747	0.0224056	-0.281471	0.00906485
TMEM44-AS1	lightcyan	0.247204	0.022555	0.184191	0.09151
RPS4Y1	lightcyan	-0.24717	0.0225743	-0.315409	0.0032788
RP11-173M1.8	lightcyan	0.247095	0.0226166	0.194855	0.0739298
DCP1B	lightcyan	-0.246598	0.0228989	-0.346529	0.00115883
RP3-428L16.2	lightcyan	0.246405	0.0230097	0.33989	0.00145986
KATNA1	lightcyan	0.245114	0.02376	0.351639	0.000966819
CTHRC1	lightcyan	0.24436	0.0242076	0.445249	1.9566e-05
RP11-44F21.5	lightcyan	-0.243666	0.0246266	-0.256855	0.0176452
CDR2L	lightcyan	0.243327	0.0248329	0.422297	5.67907e-05
PCSK9	lightcyan	0.242916	0.0250854	0.423178	5.45914e-05
LDLRAD3	lightcyan	-0.242688	0.0252266	-0.320922	0.00274822
DQ576994	lightcyan	0.242509	0.0253377	0.273267	0.0113914
PTX3	lightcyan	0.241993	0.025661	0.409882	9.79578e-05
RP11-477N3.1	lightcyan	-0.241928	0.0257018	-0.28209	0.00890752
SIPA1L1	lightcyan	0.240997	0.0262938	0.304702	0.00457726
ZNF805	lightcyan	0.240937	0.0263326	0.231917	0.0327021
SLC1A4	lightcyan	0.240778	0.0264353	0.390604	0.000219171
PIK3IP1	lightcyan	0.238779	0.0277515	0.192704	0.077238
MEF2D	lightcyan	-0.237759	0.028445	-0.277786	0.0100526
NCKAP5	lightcyan	0.237317	0.0287498	0.324856	0.00241814
CCDC53	lightcyan	-0.23704	0.0289417	-0.179868	0.0995138
METTL1	lightcyan	0.236969	0.0289912	0.24222	0.0255182
PCDH7	lightcyan	0.236961	0.0289972	0.355029	0.000855887
CXCL13	lightcyan	0.236255	0.0294932	0.453367	1.31725e-05
L3HYPDH	lightcyan	0.236077	0.0296193	0.358035	0.000767359
STAR	lightcyan	-0.235926	0.0297268	-0.407002	0.000110831
MCTP1	lightcyan	0.235641	0.0299303	0.477527	3.8159e-06
ECHDC2	lightcyan	-0.235606	0.0299561	-0.469146	5.92788e-06
SKIDA1	lightcyan	-0.235597	0.0299625	-0.472811	4.89623e-06
KIF16B	lightcyan	0.2351	0.0303203	0.252095	0.0199379
ATP6V0E2	lightcyan	-0.235089	0.0303288	-0.402451	0.000134395
NAF1	lightcyan	-0.234808	0.0305325	-0.299704	0.00532661
CDH22	lightcyan	-0.23407	0.031075	-0.31727	0.0030902
LOC729732	lightcyan	-0.232823	0.0320087	-0.347719	0.00111127
ILDR2	lightcyan	-0.232639	0.0321485	-0.241342	0.0260732
RPS6KL1	lightcyan	0.232592	0.0321844	0.31656	0.00316094
RGL2	lightcyan	-0.232567	0.0322035	-0.30502	0.0045328
CNNM1	lightcyan	-0.231957	0.032671	-0.201596	0.0642917
GNPDA1	lightcyan	0.231294	0.0331864	0.290032	0.0070917
IGHV1-69	lightcyan	0.229719	0.0344371	0.313327	0.0035018
QRICH1	lightcyan	-0.22949	0.0346223	-0.245618	0.0234645
RAB6B	lightcyan	-0.229383	0.0347088	-0.190798	0.0802681
CBLB	lightcyan	0.228923	0.0350841	0.439529	2.57027e-05
GPR143	lightcyan	-0.228864	0.035132	-0.249314	0.0213922
CYP2E1	lightcyan	-0.228518	0.0354169	-0.35833	0.000759126
TOB1-AS1	lightcyan	-0.22845	0.0354731	-0.265608	0.0140171
NKG7	lightcyan	0.228294	0.0356028	0.376192	0.000387803
APBB2	lightcyan	0.228258	0.0356323	0.35107	0.000986671
EYA4	lightcyan	0.227542	0.0362307	0.327937	0.00218497
LOC389834	lightcyan	-0.22676	0.0368942	-0.284095	0.00841427
LINC00968	lightcyan	0.226545	0.0370779	0.326654	0.00227945
ZNF22	lightcyan	0.226517	0.0371018	0.450733	1.49933e-05
FADD	lightcyan	0.225774	0.0377446	0.294336	0.00625091
CGREF1	lightcyan	0.224511	0.0388574	0.316248	0.00319254
VIPR1	lightcyan	-0.222725	0.040479	-0.25679	0.0176747
FAM71E1	lightcyan	0.222154	0.0410089	0.26733	0.0133847
ZNF213-AS1	lightcyan	-0.22154	0.041585	-0.366341	0.000564371
MYB	lightcyan	-0.221165	0.0419403	-0.475111	4.33779e-06
PPAPDC1B	lightcyan	0.220947	0.0421482	0.2186	0.0444389
TGFBR1	lightcyan	0.220361	0.04271	0.563396	1.98334e-08
LINC00624	lightcyan	-0.220098	0.042965	-0.260519	0.0160382
PARP6	lightcyan	-0.220016	0.0430443	-0.20828	0.0557676
ZSWIM3	lightcyan	-0.219822	0.0432336	-0.233628	0.031403
EIF5A2	lightcyan	0.219357	0.0436888	0.346856	0.0011456
MCAM	lightcyan	0.219086	0.0439557	0.294766	0.00617205
KDM5C	lightcyan	-0.21881	0.0442293	-0.249178	0.0214655
RNF175	lightcyan	0.21864	0.0443989	0.343731	0.00127808
C9	lightcyan	-0.218293	0.0447451	-0.194572	0.0743582
PBX4	lightcyan	-0.217736	0.0453069	-0.297376	0.00571145
IFT46	lightcyan	0.217462	0.045586	0.265199	0.0141708
SOX11	lightcyan	0.216874	0.0461879	0.230741	0.0336213
ANKRD18B	lightcyan	-0.2163	0.046782	-0.395992	0.000175861
DBN1	lightcyan	0.215784	0.0473216	0.371495	0.000464455
ZUFSP	lightcyan	0.21575	0.047358	0.282083	0.00890939
LOC101927609	lightcyan	-0.215467	0.0476564	-0.296864	0.00579932
COL8A2	lightcyan	0.215042	0.0481066	0.26591	0.0139043
RBMS1	lightcyan	0.215033	0.0481161	0.274705	0.0109495
DLX4	lightcyan	0.214873	0.0482874	0.384916	0.000275391
CCNA1	lightcyan	0.214831	0.0483323	0.244522	0.0241112
EGFL6	lightcyan	0.214807	0.0483575	0.391763	0.000209098
SNAI2	lightcyan	0.214375	0.048822	0.422491	5.63012e-05
DDX3Y	lightcyan	-0.213696	0.0495587	-0.261443	0.0156537
PPP1R36	lightcyan	-0.213617	0.0496441	-0.357014	0.000796435
GPX7	lightcyan	0.213559	0.0497081	0.380233	0.000331328
BATF2	lightcyan	0.213447	0.0498311	0.335007	0.0017246
QRFPR	lightcyan	0.213332	0.0499574	0.266728	0.0136029
CFI	lightcyan	0.212963	0.0503636	0.376316	0.000385937
FUT11	lightcyan	0.212654	0.0507065	0.434614	3.23653e-05
CDC42EP3	lightcyan	0.212629	0.0507345	0.371571	0.000463116
AASDH	lightcyan	-0.212459	0.0509237	-0.405477	0.000118264
CLDN20	lightcyan	-0.211132	0.0524226	-0.290493	0.0069971
LELP1	lightcyan	-0.209975	0.0537597	-0.400186	0.000147776
HLA-DQA1	lightcyan	-0.208111	0.0559707	-0.14834	0.175454
PPP1R26	lightcyan	0.208036	0.0560617	0.361106	0.00068561
H2BFXP	lightcyan	0.207648	0.0565313	0.323258	0.00254766
ZFP57	lightcyan	0.207526	0.0566802	0.280914	0.00920853
ZSCAN32	lightcyan	-0.207206	0.0570714	-0.193691	0.0757052
HOTAIRM1	lightcyan	0.206445	0.0580105	0.228306	0.0355922
SCML2	lightcyan	-0.206278	0.0582174	-0.36384	0.000619598
PAK1	lightcyan	0.206205	0.0583084	0.434264	3.28973e-05
MRPS28	lightcyan	0.205156	0.0596294	0.388394	0.000239617
NGFRAP1	lightcyan	0.205008	0.0598177	0.216721	0.0463461
KCNMA1	lightcyan	0.204811	0.0600685	0.347577	0.00111685
UBTD2	lightcyan	0.204383	0.0606176	0.370433	0.000483613
SRPX	lightcyan	0.204186	0.0608709	0.32233	0.0026257
EIF1AY	lightcyan	-0.204165	0.0608981	-0.25119	0.0204015
PHGDH	lightcyan	-0.204124	0.0609518	-0.439521	2.57116e-05
ALOX12P2	lightcyan	-0.203967	0.0611547	-0.304409	0.00461838
FAM20A	lightcyan	0.203874	0.0612755	0.375322	0.000401055
SLCO3A1	lightcyan	-0.203585	0.0616513	-0.361764	0.00066916
SH2B3	lightcyan	0.20142	0.0645302	0.362892	0.0006418
TNFAIP2	lightcyan	0.200411	0.0659084	0.203293	0.0620332
DMRTA2	lightcyan	0.198834	0.0681098	0.248677	0.0217377
NRAS	lightcyan	0.198512	0.0685675	0.218966	0.0440743
ZNF649	lightcyan	-0.198341	0.0688105	-0.269542	0.0126093
THAP1	lightcyan	0.198157	0.0690731	0.264754	0.0143399
CAP2	lightcyan	0.198094	0.0691631	0.312177	0.00363081
SAAL1	lightcyan	0.197594	0.0698829	0.362367	0.000654417
HRSP12	lightcyan	0.197373	0.0702031	0.265316	0.0141265
CARD6	lightcyan	0.196702	0.0711812	0.416477	7.35229e-05
C2CD4A	lightcyan	0.196478	0.0715102	0.249275	0.0214133
KRT4	lightcyan	-0.195525	0.0729227	-0.318042	0.0030149
CTBP2	lightcyan	0.195177	0.0734439	0.398226	0.000160339
TAF1A-AS1	lightcyan	0.194115	0.0750543	0.206067	0.0584809
PCDH19	lightcyan	0.1939	0.0753841	0.243124	0.0249574
GPR126	lightcyan	-0.193339	0.07625	-0.415214	7.77146e-05
PIGN	lightcyan	-0.192971	0.0768208	-0.374565	0.000412928
GRB10	lightcyan	0.192807	0.077077	0.356863	0.000800841
OSBPL6	lightcyan	-0.192633	0.0773495	-0.35127	0.000979637
TMTC1	lightcyan	0.192361	0.0777772	0.361018	0.000687833
FLJ13744	lightcyan	0.190985	0.0799663	0.284691	0.00827247
LOC101929475	lightcyan	0.190913	0.0800828	0.197239	0.0703976
KLB	lightcyan	-0.190648	0.0805102	-0.396434	0.000172684
MEX3B	lightcyan	0.190552	0.0806665	0.262543	0.015206
ITM2C	lightcyan	0.190387	0.0809338	0.446746	1.82027e-05
PXDC1	lightcyan	0.190369	0.080963	0.418568	6.70465e-05
ALX1	lightcyan	-0.18861	0.083862	-0.23029	0.0339787
SRY	lightcyan	-0.186941	0.0866881	-0.348213	0.00109204
TESK2	lightcyan	-0.186828	0.0868828	-0.348772	0.00107066
DEXI	lightcyan	0.186579	0.0873114	0.286977	0.00774737
CXADR	lightcyan	-0.186231	0.0879141	-0.305025	0.00453209
TRIM35	lightcyan	-0.185599	0.0890155	-0.227267	0.0364627
KIF7	lightcyan	0.185372	0.0894135	0.30758	0.00418953
BTBD3	lightcyan	-0.185307	0.0895293	-0.367593	0.000538436
AF001548.5	lightcyan	-0.184754	0.0905071	-0.278286	0.00991345
INO80	lightcyan	-0.184353	0.09122	-0.225709	0.0378011
C8orf48	lightcyan	-0.183561	0.0926449	-0.225555	0.0379354
ZNF778	lightcyan	-0.182819	0.0939934	-0.293763	0.00635755
ASPHD2	lightcyan	-0.18198	0.0955375	-0.127297	0.245653
SLC3A1	lightcyan	-0.181771	0.0959254	-0.348468	0.00108222
BAG2	lightcyan	0.180703	0.0979277	0.302251	0.00493211
CENPU	lightcyan	-0.179563	0.100099	-0.302788	0.00485229
NACC2	lightcyan	0.175896	0.107344	0.288287	0.00745989
LOC101928111	lightcyan	-0.175079	0.10901	-0.251785	0.0200958
FRMD6	lightcyan	0.174929	0.10932	0.267104	0.0134663
SLFN11	lightcyan	0.174596	0.110006	0.396775	0.000170268
ARFGAP3	lightcyan	0.174219	0.110789	0.390377	0.000221191
SLC25A43	lightcyan	-0.172664	0.114059	-0.326029	0.00232683
LOC389906	lightcyan	0.171669	0.116192	0.268963	0.0128084
LOC101927157	lightcyan	-0.169468	0.121016	-0.374773	0.000409631
DUSP23	lightcyan	-0.168879	0.122332	-0.198953	0.0679419
CENPBD1	lightcyan	0.168104	0.124082	0.252678	0.0196442
LINC00328	lightcyan	-0.167468	0.125532	-0.263301	0.0149041
PDE4B	lightcyan	0.166892	0.126856	0.422607	5.60083e-05
GJA5	lightcyan	0.166877	0.126891	0.297501	0.00569021
SEMA6A	lightcyan	0.166413	0.127967	0.289497	0.00720297
FDCSP	lightcyan	0.166111	0.12867	0.202878	0.0625799
RP11-339B21.15	lightcyan	-0.165789	0.129422	-0.114769	0.295603
ACBD6	lightcyan	0.16498	0.13133	0.268601	0.0129344
XK	lightcyan	-0.164873	0.131583	-0.274561	0.0109932
PFN2	lightcyan	0.16475	0.131875	0.287155	0.00770781
GDF10	lightcyan	0.163118	0.135799	0.332936	0.00184942
COL4A6	lightcyan	0.163018	0.136042	0.351683	0.000965289
MS4A2	lightcyan	0.162545	0.137199	0.183875	0.0920776
ZNF630	lightcyan	-0.162114	0.138257	-0.175967	0.107198
DNASE1L1	lightcyan	0.161849	0.138911	0.261715	0.015542
CYR61	lightcyan	0.160046	0.143425	0.30815	0.00411636
DGKI	lightcyan	0.160034	0.143457	0.203066	0.062332
RP11-554J4.1	lightcyan	-0.159969	0.143621	-0.210976	0.0526019
CCDC102B	lightcyan	0.159958	0.143649	0.364006	0.000615784
PARS2	lightcyan	-0.159644	0.144446	-0.284782	0.00825102
RP1-39G22.7	lightcyan	-0.158057	0.148533	-0.372259	0.000451118
CRISPLD1	lightcyan	0.158	0.148681	0.314078	0.00341988
RUNX3	lightcyan	0.15774	0.149359	0.355115	0.000853223
TNNT2	lightcyan	-0.15708	0.151091	-0.376936	0.00037678
TRIM32	lightcyan	0.156567	0.152447	0.185791	0.0886792
RGS17	lightcyan	0.155979	0.15401	0.182338	0.0948772
IGFBP6	lightcyan	0.155802	0.154484	0.380533	0.000327459
SFRP1	lightcyan	0.155615	0.154986	0.305546	0.00446036
KIAA1715	lightcyan	-0.154915	0.156875	-0.308907	0.00402087
EPB41L4A	lightcyan	-0.154264	0.158647	-0.246684	0.0228499
MME	lightcyan	0.153568	0.160557	0.308495	0.00407253
GRIP1	lightcyan	-0.153104	0.161841	-0.300477	0.0052041
TNKS	lightcyan	-0.151023	0.167686	-0.23676	0.0291374
EVA1C	lightcyan	-0.150812	0.168287	-0.225186	0.0382591
PPIP5K1	lightcyan	-0.150334	0.169657	-0.178311	0.102528
TMEM129	lightcyan	-0.150327	0.169676	-0.219066	0.0439752
AL132709.8	lightcyan	0.149579	0.171834	0.321381	0.0027077
PRICKLE1	lightcyan	-0.148733	0.174301	-0.180621	0.0980828
STAU2	lightcyan	-0.148411	0.175244	-0.223879	0.0394249
TNFSF13	lightcyan	0.14819	0.175896	0.32759	0.00221016
SWAP70	lightcyan	0.147399	0.178239	0.275535	0.0107013
RNF166	lightcyan	0.147197	0.178841	0.259165	0.0166165
SND1-IT1	lightcyan	0.144955	0.185624	0.158295	0.147914
C1orf50	lightcyan	-0.144906	0.185776	-0.21745	0.0455975
NUDT5	lightcyan	-0.144279	0.187706	-0.191045	0.0798702
CCDC8	lightcyan	0.143929	0.188789	0.10694	0.329991
LOC100506374	lightcyan	-0.142242	0.19408	-0.319192	0.00290578
SLC15A2	lightcyan	0.141499	0.196444	0.315026	0.00331881
LOC102724587	lightcyan	0.140639	0.199206	0.182494	0.0945889
CTTNBP2NL	lightcyan	-0.138768	0.205307	-0.391557	0.000210856
VSIG10	lightcyan	-0.138669	0.205635	-0.290694	0.00695632
PNMA2	lightcyan	0.137705	0.208836	0.23221	0.0324766
PRRG1	lightcyan	0.137209	0.210495	0.353431	0.000906659
FTSJ3	lightcyan	0.134588	0.219425	0.322366	0.00262263
THG1L	lightcyan	0.134471	0.219829	0.229024	0.0350009
AY927499	lightcyan	0.13341	0.22352	0.151804	0.165474
GLIS2	lightcyan	0.133196	0.224273	0.303282	0.00478003
PABPC4L	lightcyan	0.132281	0.227501	0.260123	0.0162055
DPF2	lightcyan	0.132133	0.228023	0.274302	0.0110718
AP4S1	lightcyan	-0.131125	0.231624	-0.313978	0.00343071
CD38	lightcyan	0.130638	0.233379	0.200662	0.0655636
ELMSAN1	lightcyan	-0.130105	0.235307	-0.154148	0.158965
TBCK	lightcyan	0.128671	0.240552	0.0879156	0.423658
PNPLA4	lightcyan	0.128328	0.241818	0.103581	0.34549
NCOA1	lightcyan	-0.127932	0.243287	-0.242991	0.0250395
DLX6	lightcyan	-0.127556	0.244685	-0.311739	0.00368097
AF279780	lightcyan	0.126421	0.248943	0.132832	0.225551
FAM101B	lightcyan	0.125964	0.250674	0.273797	0.0112268
SPESP1	lightcyan	0.124247	0.257241	0.219975	0.0430842
PPBP	lightcyan	0.123989	0.258239	0.159405	0.145056
AACSP1	lightcyan	0.123365	0.26066	0.10383	0.344326
NTNG2	lightcyan	0.122663	0.263406	0.217285	0.0457659
AIM1	lightcyan	0.122441	0.264276	-0.0909201	0.407927
LRRK1	lightcyan	0.12054	0.271821	0.0836554	0.446549
CDIPT-AS1	lightcyan	-0.119522	0.27592	-0.087901	0.423735
GPR137B	lightcyan	-0.118522	0.279987	-0.259169	0.0166148
MRPL18	lightcyan	0.117691	0.283395	0.200473	0.0658234
NRCAM	lightcyan	0.117149	0.285634	0.28921	0.00726317
GTF2IRD2	lightcyan	0.116043	0.290236	0.231169	0.0332839
NFKBIZ	lightcyan	0.115882	0.290914	0.0971249	0.376544
DZIP1	lightcyan	0.115503	0.292504	0.336841	0.00162048
LDHB	lightcyan	0.114959	0.294799	0.324164	0.00247345
PPP1R3B	lightcyan	0.112839	0.303851	0.118937	0.278291
PHKA1	lightcyan	0.112316	0.306111	0.103961	0.343717
NOTCH1	lightcyan	-0.110687	0.313228	-0.335201	0.00171328
ACVR1	lightcyan	0.110327	0.314811	0.353211	0.000913842
BC035400	lightcyan	0.110208	0.315338	0.193364	0.0762111
LY96	lightcyan	0.109025	0.320591	0.361054	0.000686926
FOLH1B	lightcyan	0.107658	0.326732	0.254645	0.0186797
ASCC1	lightcyan	0.107459	0.327632	0.317093	0.00310769
RP11-1L12.3	lightcyan	0.107309	0.328312	0.25272	0.0196232
TP53TG1	lightcyan	-0.106782	0.330707	-0.24722	0.022546
GLIS3	lightcyan	0.105976	0.334392	0.314648	0.0033588
FOLH1	lightcyan	0.105187	0.338023	0.275388	0.0107447
PROL1	lightcyan	0.104559	0.340932	0.149692	0.171506
CRYL1	lightcyan	0.104363	0.341841	0.191504	0.0791351
PPP2R2A	lightcyan	-0.103263	0.346982	-0.186477	0.0874874
LOC100286925	lightcyan	0.102979	0.348317	0.191856	0.078575
UPK1B	lightcyan	0.100394	0.360613	0.0873439	0.42669
SLC25A23	lightcyan	-0.0993805	0.365508	-0.350225	0.00101682
STXBP1	lightcyan	0.0989937	0.367386	0.282132	0.00889704
MOB3B	lightcyan	0.0980057	0.372211	0.227545	0.0362282
PTRH2	lightcyan	0.0968237	0.378033	0.294665	0.00619059
LOC646588	lightcyan	-0.0948067	0.388094	-0.158622	0.147068
RNF4	lightcyan	0.0943814	0.390236	0.149034	0.173419
LRCH2	lightcyan	0.093753	0.393413	0.157217	0.150729
LINC00462	lightcyan	-0.0924566	0.400017	-4.62677e-05	0.999665
OK/SW-CL.58	lightcyan	0.0913506	0.405702	0.133014	0.224911
LYSMD2	lightcyan	0.0912935	0.405997	0.144177	0.188021
RIN1	lightcyan	-0.0906444	0.409356	-0.151538	0.166225
STK31	lightcyan	-0.0889191	0.418366	-0.10641	0.332404
SLC37A3	lightcyan	0.0878749	0.423873	0.319952	0.00283561
RP11-48B3.4	lightcyan	0.0874341	0.426211	0.108751	0.321816
MARVELD1	lightcyan	0.087411	0.426333	0.361155	0.000684379
PSCA	lightcyan	-0.0863977	0.431735	-0.166092	0.128714
KIAA1586	lightcyan	0.0858645	0.434594	0.210625	0.0530053
PRR12	lightcyan	-0.0848454	0.440087	-0.269858	0.012502
RP11-876N24.5	lightcyan	0.0845948	0.441443	0.116164	0.289732
CLEC1A	lightcyan	0.0829974	0.450145	0.227051	0.0366461
LTBP2	lightcyan	0.0823711	0.453583	0.334052	0.00178119
AX747064	lightcyan	-0.0821764	0.454655	-0.301971	0.00497415
AMOTL1	lightcyan	0.0815857	0.457915	0.131588	0.229965
C17orf99	lightcyan	0.0789612	0.472554	0.116159	0.28975
OMA1	lightcyan	-0.0772556	0.482201	-0.273653	0.0112714
GADD45A	lightcyan	0.0745484	0.497727	0.188671	0.0837605
DLL1	lightcyan	0.0723969	0.51025	0.26898	0.0128026
ZFY	lightcyan	-0.0712487	0.516998	-0.179846	0.099557
LINC01133	lightcyan	-0.0701625	0.523424	-0.205462	0.0592409
RNASEH1-AS1	lightcyan	0.0694282	0.527791	0.0885535	0.420289
LOC100505664	lightcyan	-0.0685385	0.533106	-0.274317	0.0110674
TLR5	lightcyan	-0.0674959	0.539368	-0.163024	0.136029
LOC102724017	lightcyan	-0.0641827	0.559505	-0.101462	0.355503
HOXB7	lightcyan	0.0640303	0.56044	0.29415	0.00628545
ATF3	lightcyan	-0.0635478	0.563405	-0.153724	0.160126
FAM109B	lightcyan	0.0619851	0.573057	0.172289	0.114859
MRPL1	lightcyan	0.0619182	0.573472	0.175946	0.107242
RP11-355B11.2	lightcyan	-0.0614255	0.576532	-0.229202	0.0348557
IFNK	lightcyan	0.0611537	0.578223	0.144118	0.188205
LINC00472	lightcyan	0.0610394	0.578935	0.162233	0.137965
AAED1	lightcyan	0.0605987	0.581684	0.311413	0.00371874
LOC441528	lightcyan	0.0584164	0.595383	0.101382	0.355883
KIZ	lightcyan	0.0584116	0.595413	0.265604	0.0140184
VPS52	lightcyan	-0.0559334	0.611142	-0.267371	0.01337
AMDHD1	lightcyan	-0.0541336	0.622678	-0.178226	0.102695
SEMA3C	lightcyan	0.0529099	0.630574	0.196047	0.0721463
CDH13	lightcyan	-0.0527484	0.631619	0.202601	0.0629468
XIST	lightcyan	0.0510751	0.64249	0.104142	0.342871
TSIX	lightcyan	0.0503028	0.647533	0.0995406	0.364732
TRPM1	lightcyan	-0.0501136	0.648771	-0.117625	0.283665
H2AFY2	lightcyan	0.0500461	0.649213	0.16476	0.131852
COBLL1	lightcyan	-0.0486957	0.658078	-0.242175	0.0255463
PTH2R	lightcyan	0.0485027	0.65935	0.112013	0.307426
NUDT2	lightcyan	-0.0481918	0.661399	-0.21993	0.0431284
LOC729970	lightcyan	0.0480962	0.66203	0.2382	0.0281432
PPIC	lightcyan	0.0477496	0.664318	0.262942	0.0150466
PSAP	lightcyan	0.0475306	0.665766	0.3292	0.0020954
SDK1	lightcyan	0.0443293	0.687064	0.310963	0.00377148
DQX1	lightcyan	0.042227	0.701186	-0.0962459	0.380899
CELSR2	lightcyan	-0.0410678	0.709016	-0.254697	0.0186549
IGJ	lightcyan	0.0399217	0.716788	0.0724557	0.509906
TTTY15	lightcyan	-0.0376964	0.73196	-0.0680313	0.536148
MAGEA6	lightcyan	-0.0373622	0.734247	-0.0508347	0.644058
IRX5	lightcyan	-0.0341775	0.756161	-0.321921	0.00266079
KDM6A	lightcyan	-0.0335151	0.760744	-0.143052	0.191527
LOC100272217	lightcyan	-0.0331038	0.763594	-0.144738	0.186292
EBF4	lightcyan	0.0326262	0.766907	0.177287	0.104548
PAX8-AS1	lightcyan	0.0314792	0.77488	0.109836	0.316981
MIPEPP3	lightcyan	0.0288815	0.793024	-0.152035	0.164825
LAMB1	lightcyan	0.0285449	0.795383	0.288609	0.00739077
PDE4D	lightcyan	0.0269461	0.806614	0.184546	0.0908768
DNMT3A	lightcyan	0.0253562	0.817821	0.240006	0.026937
HOXD8	lightcyan	-0.0249946	0.820376	0.245357	0.0236168
GSTT2	lightcyan	0.0240299	0.827198	-0.128206	0.242268
MGAT2	lightcyan	0.0235119	0.830867	0.273806	0.011224
SPRED2	lightcyan	0.0217971	0.843039	0.237583	0.0285661
ADI1	lightcyan	0.0213258	0.846391	0.0392163	0.721586
PJA1	lightcyan	0.0201088	0.855059	0.213063	0.0502537
RP11-348B17.1	lightcyan	0.0178084	0.871489	-0.073035	0.506519
CTNNAL1	lightcyan	-0.0176105	0.872905	0.226559	0.0370658
ZNF275	lightcyan	0.0162609	0.882573	0.254162	0.0189127
TMEM180	lightcyan	-0.0157181	0.886467	-0.208648	0.0553266
DOCK11	lightcyan	0.0149035	0.892315	0.392791	0.000200523
JADE2	lightcyan	-0.0102264	0.925992	0.0286636	0.794551
LOC440173	lightcyan	0.00808839	0.941433	0.171369	0.11684
UBAP2	lightcyan	-0.00726131	0.947413	-0.131097	0.231723
WWC3	lightcyan	0.00305976	0.977828	-0.221493	0.041629
EPB41L4B	lightcyan	0.00304463	0.977938	-0.0302389	0.783529

## Sheet: Supplementary Table 2
Supplementary Table 2. Genes in the module 23 for AK in the GSE45216-98774 dataset
geneSymbol	moduleColor	GS.AK	p.GS.AK	MM.yellowgreen	p.MM.yellowgreen
KRT9	yellowgreen	0.675994	1.26053e-12	0.654994	1.04269e-11
COMP	yellowgreen	0.583081	4.7586e-09	0.430944	3.83559e-05
ZSCAN31	yellowgreen	0.521553	3.08365e-07	0.729173	2.51698e-15
PITX2	yellowgreen	0.495268	1.44406e-06	0.570311	1.21412e-08
CNKSR3	yellowgreen	0.487364	2.24146e-06	0.758477	4.20146e-17
F3	yellowgreen	-0.472902	4.87276e-06	-0.719564	8.59692e-15
SUSD4	yellowgreen	0.463711	7.83937e-06	0.792167	1.73631e-19
TRPS1	yellowgreen	0.453092	1.33522e-05	0.588801	3.08682e-09
ABCC5	yellowgreen	0.429134	4.16769e-05	0.546098	6.45311e-08
SLC30A4	yellowgreen	0.425158	4.99345e-05	0.61675	3.28251e-10
SOX7	yellowgreen	0.409366	0.000100159	0.721168	7.02811e-15
MT1HL1	yellowgreen	-0.359093	0.000738242	-0.845003	2.81528e-24
THBS3	yellowgreen	-0.358361	0.000758269	-0.516983	4.07096e-07
MT2A	yellowgreen	-0.356916	0.000799278	-0.824914	2.87622e-22
MT1G	yellowgreen	-0.356732	0.000804664	-0.799905	4.25939e-20
NOS1	yellowgreen	0.354782	0.000863545	0.448032	1.71036e-05
MT1X	yellowgreen	-0.347258	0.00112949	-0.777007	2.30964e-18
INPP5E	yellowgreen	-0.339833	0.00146274	-0.536592	1.20023e-07
ACOX3	yellowgreen	0.332838	0.0018555	0.528893	1.95675e-07
MT1H	yellowgreen	-0.329398	0.00208164	-0.817963	1.24526e-21
TGFBI	yellowgreen	-0.328559	0.00214045	-0.612234	4.78558e-10
FAM84A	yellowgreen	0.321616	0.00268719	0.756997	5.23785e-17
HTATSF1P2	yellowgreen	0.308574	0.00406267	0.538054	1.09236e-07
MT1F	yellowgreen	-0.285778	0.00801911	-0.826834	1.89674e-22
MT1E	yellowgreen	-0.240858	0.0263836	-0.809049	7.46235e-21
SERAC1	yellowgreen	0.214089	0.0491313	0.538237	1.07952e-07
MST4	yellowgreen	0.194991	0.073724	0.519435	3.50911e-07
KIAA1919	yellowgreen	0.175118	0.108931	0.371112	0.00047128
SORT1	yellowgreen	0.167546	0.125354	0.559178	2.66098e-08
OSBPL11	yellowgreen	0.156337	0.153058	0.514495	4.72771e-07
GM2A	yellowgreen	0.0118349	0.914392	0.469272	5.88921e-06

## Sheet: Supplementary Table 3
Supplementary Table 3. Genes in the module 9 for normal sample in the GSE45216-98774 dataset
geneSymbol	moduleColor	GS.normal	p.GS.normal	MM.lightyellow	p.MM.lightyellow
WIF1	lightyellow	0.927849	2.63262e-37	0.735784	1.04828e-15
C1QTNF7	lightyellow	0.870679	2.64173e-27	0.835664	2.61363e-23
ADH1B	lightyellow	0.856457	1.48517e-25	0.849984	8.07109e-25
PAMR1	lightyellow	0.853861	2.95691e-25	0.769728	7.45427e-18
GSTM5	lightyellow	0.82734	1.69851e-22	0.796917	7.38105e-20
GALNT16	lightyellow	0.825285	2.65497e-22	0.831358	6.97014e-23
TSPAN8	lightyellow	0.823672	3.75503e-22	0.876187	4.87249e-28
AGTR1	lightyellow	0.791046	2.1179e-19	0.894236	1.02788e-30
LYVE1	lightyellow	0.787814	3.73035e-19	0.849099	1.0109e-24
PAK3	lightyellow	0.782802	8.80134e-19	0.779725	1.47448e-18
SGCG	lightyellow	0.777339	2.18726e-18	0.736555	9.44891e-16
FGFBP2	lightyellow	0.773988	3.77524e-18	0.847942	1.35423e-24
LRFN5	lightyellow	0.768722	8.73587e-18	0.82401	3.49281e-22
MAMDC2	lightyellow	0.76647	1.24229e-17	0.777133	2.2625e-18
PTGIS	lightyellow	0.757399	4.93378e-17	0.876326	4.66435e-28
HSPB7	lightyellow	0.757123	5.14111e-17	0.792832	1.54253e-19
CLDN11	lightyellow	0.741941	4.52759e-16	0.761396	2.70721e-17
PDK4	lightyellow	0.74062	5.4322e-16	0.762058	2.44854e-17
SCN7A	lightyellow	0.73153	1.84727e-15	0.777783	2.03323e-18
LRRN4CL	lightyellow	0.717924	1.05488e-14	0.817134	1.477e-21
FHL1	lightyellow	0.707584	3.70912e-14	0.87439	8.53217e-28
ADAM33	lightyellow	0.705444	4.77901e-14	0.694288	1.72841e-13
CFD	lightyellow	0.703191	6.22551e-14	0.797127	7.10439e-20
LRRC2	lightyellow	0.699022	1.00893e-13	0.841954	5.92036e-24
RAI2	lightyellow	0.698282	1.09826e-13	0.879396	1.75256e-28
HRASLS5	lightyellow	0.695604	1.4897e-13	0.756789	5.40183e-17
SCARA5	lightyellow	0.689666	2.895e-13	0.803864	2.02638e-20
OSR1	lightyellow	0.685769	4.43918e-13	0.77899	1.66584e-18
HIF3A	lightyellow	0.685046	4.8018e-13	0.738338	7.4209e-16
VIT	lightyellow	0.684058	5.34429e-13	0.779324	1.57594e-18
HHATL	lightyellow	0.681365	7.13902e-13	0.660745	5.94429e-12
DKK2	lightyellow	0.667897	2.90464e-12	0.667073	3.15748e-12
SP5	lightyellow	0.66463	4.03841e-12	0.6765	1.19538e-12
SCARA3	lightyellow	0.66435	4.15333e-12	0.680326	7.97658e-13
OLFML1	lightyellow	0.663685	4.43881e-12	0.870123	3.1191e-27
SFN	lightyellow	-0.66328	4.62204e-12	-0.695422	1.5207e-13
NR3C2	lightyellow	0.663279	4.62243e-12	0.772778	4.58653e-18
SGCA	lightyellow	0.659442	6.75844e-12	0.689969	2.79946e-13
CD34	lightyellow	0.655085	1.03355e-11	0.838882	1.23233e-23
DENND2A	lightyellow	0.653873	1.16171e-11	0.761266	2.76129e-17
FXYD6	lightyellow	0.653582	1.1947e-11	0.712977	1.93834e-14
SORBS1	lightyellow	0.645802	2.49748e-11	0.774869	3.27311e-18
AQPEP	lightyellow	0.645286	2.62057e-11	0.87182	1.87294e-27
CORO2B	lightyellow	0.643433	3.11309e-11	0.793045	1.48488e-19
PRKG2	lightyellow	0.642659	3.34417e-11	0.659446	6.75599e-12
IL17D	lightyellow	0.64126	3.80421e-11	0.711821	2.23029e-14
HNMT	lightyellow	0.635201	6.59728e-11	0.753667	8.55262e-17
CADM3	lightyellow	0.631161	9.46009e-11	0.652359	1.34342e-11
LOC400043	lightyellow	0.630264	1.02407e-10	0.777243	2.22181e-18
MARCO	lightyellow	0.629002	1.14448e-10	0.705599	4.69227e-14
CAB39L	lightyellow	0.625861	1.50598e-10	0.692762	2.05153e-13
MICALL1	lightyellow	-0.625183	1.5974e-10	-0.700123	8.88898e-14
COL28A1	lightyellow	0.624264	1.72959e-10	0.726343	3.63359e-15
FAM149A	lightyellow	0.623272	1.88404e-10	0.728538	2.73438e-15
AF070581	lightyellow	0.622912	1.94335e-10	0.684859	4.90019e-13
WISP2	lightyellow	0.620397	2.41029e-10	0.846906	1.75602e-24
PRRG3	lightyellow	0.62037	2.41587e-10	0.702076	7.08958e-14
FBLN1	lightyellow	0.615079	3.77667e-10	0.785222	5.83123e-19
PRELP	lightyellow	0.615049	3.78611e-10	0.756516	5.62486e-17
KIAA1377	lightyellow	0.614402	3.99618e-10	0.733422	1.43776e-15
MMP27	lightyellow	0.609775	5.86159e-10	0.765863	1.36502e-17
CHRDL1	lightyellow	0.609228	6.13035e-10	0.798964	5.07001e-20
KCNA6	lightyellow	0.606331	7.76396e-10	0.66386	4.36181e-12
IGFBP5	lightyellow	0.605343	8.41115e-10	0.832726	5.11877e-23
DCLK1	lightyellow	0.603234	9.96867e-10	0.830566	8.32356e-23
ABCA9	lightyellow	0.60084	1.20715e-09	0.775439	2.98393e-18
CP	lightyellow	0.598737	1.42625e-09	0.783192	8.23943e-19
CDR1	lightyellow	0.598456	1.45828e-09	0.734477	1.24913e-15
GALNT15	lightyellow	0.595345	1.8619e-09	0.772309	4.94491e-18
LOXL4	lightyellow	0.595024	1.90913e-09	0.705802	4.58116e-14
TXNIP	lightyellow	0.594492	1.99005e-09	0.736077	1.00778e-15
SSPN	lightyellow	0.592337	2.35222e-09	0.780451	1.30632e-18
GPR133	lightyellow	0.590508	2.70844e-09	0.748551	1.78965e-16
UST	lightyellow	0.58991	2.83568e-09	0.637455	5.38294e-11
FAM107A	lightyellow	0.584525	4.26923e-09	0.7786	1.77683e-18
TBX5-AS1	lightyellow	0.584509	4.27466e-09	0.694034	1.77868e-13
PLAC9	lightyellow	0.582145	5.10361e-09	0.703472	6.02437e-14
GFRA1	lightyellow	0.579298	6.30663e-09	0.788334	3.40759e-19
LIFR	lightyellow	0.572982	1.00137e-08	0.763554	1.94853e-17
CLU	lightyellow	0.569335	1.30212e-08	0.792597	1.60838e-19
CCBE1	lightyellow	0.568761	1.35659e-08	0.573884	9.3793e-09
CNKSR2	lightyellow	0.567803	1.45255e-08	0.656392	9.10547e-12
SLC35F1	lightyellow	0.565047	1.76583e-08	0.661169	5.70037e-12
APOD	lightyellow	0.560492	2.42928e-08	0.743961	3.41987e-16
SLC29A1	lightyellow	0.559008	2.69245e-08	0.668608	2.70224e-12
MAP1A	lightyellow	0.551465	4.50725e-08	0.823215	4.13951e-22
TNMD	lightyellow	0.551239	4.57657e-08	0.64596	2.46094e-11
NOVA1	lightyellow	0.54809	5.65275e-08	0.845899	2.25605e-24
CRTAP	lightyellow	0.542159	8.36499e-08	0.776168	2.64982e-18
FAM228B	lightyellow	0.541874	8.52256e-08	0.74002	5.89857e-16
SOD3	lightyellow	0.54147	8.75055e-08	0.741996	4.49309e-16
TNS1	lightyellow	0.540003	9.62772e-08	0.773337	4.19293e-18
TMEM100	lightyellow	0.537642	1.12179e-07	0.731149	1.94237e-15
ANK2	lightyellow	0.532571	1.55162e-07	0.82684	1.89463e-22
PMP22	lightyellow	0.530054	1.81909e-07	0.714051	1.7003e-14
ADD3	lightyellow	0.527984	2.07129e-07	0.73025	2.18608e-15
SPOP	lightyellow	0.527845	2.08943e-07	0.616428	3.37265e-10
PI16	lightyellow	0.522735	2.86789e-07	0.709448	2.96866e-14
ATAD3A	lightyellow	-0.522636	2.88534e-07	-0.664428	4.12098e-12
ANGPTL1	lightyellow	0.522256	2.95361e-07	0.614029	4.12269e-10
SLC17A7	lightyellow	0.52022	3.34528e-07	0.530527	1.76574e-07
SYNPO2	lightyellow	0.520175	3.35449e-07	0.646623	2.31282e-11
TXNDC15	lightyellow	0.520078	3.37433e-07	0.763687	1.90901e-17
PDGFRL	lightyellow	0.515226	4.52499e-07	0.735905	1.03132e-15
TCEAL7	lightyellow	0.513228	5.09972e-07	0.71184	2.22541e-14
CYBRD1	lightyellow	0.511836	5.53981e-07	0.790146	2.48217e-19
RERGL	lightyellow	0.506111	7.75836e-07	0.741821	4.60354e-16
WDFY3-AS2	lightyellow	0.503767	8.88968e-07	0.652857	1.28082e-11
PLXNA4	lightyellow	0.495787	1.40248e-06	0.568002	1.43212e-08
RCAN2	lightyellow	0.493369	1.60655e-06	0.756388	5.73284e-17
MAP1B	lightyellow	0.492478	1.68862e-06	0.777869	2.00474e-18
TCEAL3	lightyellow	0.492183	1.71666e-06	0.722012	6.31769e-15
RHOBTB3	lightyellow	0.491995	1.73476e-06	0.679632	8.58809e-13
HRCT1	lightyellow	0.490716	1.86266e-06	0.580444	5.79319e-09
ZBTB20	lightyellow	0.489712	1.96922e-06	0.739879	6.01312e-16
KIAA1324L	lightyellow	0.488072	2.15577e-06	0.605288	8.4486e-10
TMEM71	lightyellow	0.487095	2.27472e-06	0.590098	2.79508e-09
LIPC	lightyellow	0.481373	3.10531e-06	0.699481	9.57105e-14
FAM13A	lightyellow	0.479311	3.46906e-06	0.642329	3.44744e-11
PIK3R1	lightyellow	0.476594	4.00994e-06	0.642237	3.4769e-11
EMCN	lightyellow	0.476296	4.07389e-06	0.701568	7.5204e-14
BMP3	lightyellow	0.474609	4.4542e-06	0.497925	1.2426e-06
ANXA11	lightyellow	0.474159	4.56127e-06	0.544966	6.95525e-08
JAM3	lightyellow	0.473785	4.6518e-06	0.686036	4.31175e-13
TDG	lightyellow	-0.471989	5.11158e-06	-0.620138	2.46412e-10
NAP1L3	lightyellow	0.467483	6.46048e-06	0.711175	2.41169e-14
SDPR	lightyellow	0.467007	6.62092e-06	0.601222	1.1709e-09
PPAP2B	lightyellow	0.463241	8.02928e-06	0.787616	3.8608e-19
FCGRT	lightyellow	0.460622	9.1696e-06	0.703945	5.6996e-14
ZNF501	lightyellow	0.459818	9.54925e-06	0.476007	4.1367e-06
KCTD12	lightyellow	0.458089	1.04156e-05	0.735414	1.10172e-15
CPQ	lightyellow	0.454433	1.24961e-05	0.740862	5.25408e-16
PPM1M	lightyellow	0.45422	1.26289e-05	0.61978	2.54025e-10
FAM150B	lightyellow	0.452148	1.39877e-05	0.550485	4.81486e-08
INSM1	lightyellow	0.449863	1.56451e-05	0.525737	2.38252e-07
HOXA10	lightyellow	0.447946	1.71752e-05	0.520143	3.361e-07
TMEM47	lightyellow	0.447869	1.72396e-05	0.767296	1.09228e-17
LINC01279	lightyellow	0.447329	1.76963e-05	0.810525	5.58448e-21
ACTA2-AS1	lightyellow	0.446158	1.87275e-05	0.637039	5.58936e-11
CSNK1A1	lightyellow	-0.444446	2.03359e-05	-0.513544	5.00449e-07
RP11-16N11.2	lightyellow	0.444298	2.04806e-05	0.415752	7.59011e-05
JAZF1	lightyellow	0.443943	2.08326e-05	0.705359	4.82739e-14
FAM198A	lightyellow	0.443724	2.10518e-05	0.680736	7.63539e-13
MIR100HG	lightyellow	0.443507	2.12714e-05	0.675419	1.33868e-12
EMX2OS	lightyellow	0.438292	2.7246e-05	0.617216	3.15611e-10
TMEM132C	lightyellow	0.437726	2.79821e-05	0.53556	1.28244e-07
F10	lightyellow	0.436708	2.93512e-05	0.636343	5.95231e-11
C3	lightyellow	0.434243	3.29288e-05	0.696189	1.3942e-13
DCN	lightyellow	0.432988	3.49039e-05	0.740312	5.66684e-16
TLE2	lightyellow	0.429567	4.08601e-05	0.560216	2.47629e-08
MFAP5	lightyellow	0.429437	4.11032e-05	0.674293	1.50544e-12
EPB41L2	lightyellow	0.426212	4.76093e-05	0.737814	7.96843e-16
PTGFR	lightyellow	0.421634	5.85014e-05	0.815546	2.04303e-21
LGR5	lightyellow	0.421144	5.97952e-05	0.521901	3.01852e-07
ARL6IP5	lightyellow	0.420769	6.0803e-05	0.721918	6.39345e-15
STK32B	lightyellow	0.420626	6.11907e-05	0.584559	4.25841e-09
HSPA12B	lightyellow	0.420452	6.16672e-05	0.674081	1.53892e-12
STARD9	lightyellow	0.419604	6.40362e-05	0.652298	1.35128e-11
ESPL1	lightyellow	-0.416733	7.27003e-05	-0.644297	2.87335e-11
EID1	lightyellow	0.413127	8.51251e-05	0.712183	2.13477e-14
HSPB2	lightyellow	0.41191	8.97438e-05	0.608086	6.73085e-10
SLIT2	lightyellow	0.410673	9.46739e-05	0.74063	5.42449e-16
TBX15	lightyellow	0.409473	9.9697e-05	0.752307	1.04264e-16
AQP1	lightyellow	0.409119	0.000101228	0.688205	3.40075e-13
AOX1	lightyellow	0.408597	0.000103518	0.742927	3.94958e-16
TFDP1	lightyellow	-0.406781	0.000111879	-0.619256	2.65606e-10
F13A1	lightyellow	0.406283	0.000114277	0.681302	7.18714e-13
DTD2	lightyellow	-0.406016	0.000115583	-0.49682	1.3229e-06
ZNF423	lightyellow	0.404489	0.000123324	0.7255	4.0497e-15
KCNK2	lightyellow	0.403732	0.000127331	0.654684	1.07439e-11
ALDH4A1	lightyellow	-0.400823	0.000143894	-0.507639	7.09569e-07
HEBP1	lightyellow	0.398466	0.000158755	0.42547	4.92353e-05
ABCA6	lightyellow	0.398179	0.000160652	0.650095	1.66698e-11
EFEMP1	lightyellow	0.397984	0.000161962	0.630231	1.02708e-10
HES2	lightyellow	-0.394643	0.000185894	-0.609677	5.90895e-10
E2F1	lightyellow	-0.394036	0.000190579	-0.618229	2.89746e-10
SH3BP5	lightyellow	0.38936	0.000230476	0.704832	5.13631e-14
SDCBP	lightyellow	0.386622	0.000257272	0.657346	8.29848e-12
ZYG11A	lightyellow	-0.38512	0.000273165	-0.536338	1.21996e-07
AGAP1	lightyellow	0.385031	0.00027413	0.63228	8.56561e-11
SVEP1	lightyellow	0.383319	0.000293407	0.730409	2.14088e-15
PPP3CA	lightyellow	0.382841	0.000299008	0.56037	2.44992e-08
MEIS3P1	lightyellow	0.38125	0.000318365	0.696175	1.39632e-13
CFH	lightyellow	0.380177	0.000332058	0.71607	1.32705e-14
RGS22	lightyellow	0.379311	0.000343507	0.746028	2.55914e-16
GALNT12	lightyellow	0.373893	0.000423734	0.531855	1.62365e-07
ITGBL1	lightyellow	0.372989	0.000438693	0.703666	5.88919e-14
FGD5	lightyellow	0.372883	0.000440467	0.691868	2.26696e-13
FIBIN	lightyellow	0.372392	0.00044882	0.637498	5.36203e-11
LOC440346	lightyellow	0.370557	0.000481333	0.515595	4.42591e-07
AOC3	lightyellow	0.369607	0.000499009	0.643507	3.09183e-11
CFHR2	lightyellow	0.368036	0.000529535	0.653953	1.15279e-11
PCOLCE2	lightyellow	0.368034	0.00052957	0.603792	9.53175e-10
CTTNBP2	lightyellow	0.367257	0.00054529	0.544167	7.33144e-08
NDN	lightyellow	0.364514	0.000604245	0.672766	1.76369e-12
MPDZ	lightyellow	0.361457	0.000676781	0.597001	1.63527e-09
RNF115	lightyellow	0.360803	0.000693303	0.618132	2.92122e-10
JAM2	lightyellow	0.360338	0.000705281	0.671436	2.02303e-12
GYPC	lightyellow	0.359121	0.000737483	0.645018	2.68691e-11
MRVI1	lightyellow	0.357229	0.000790229	0.534231	1.39614e-07
GPRC5B	lightyellow	0.352497	0.000937576	0.722475	5.95792e-15
DAAM2	lightyellow	0.352167	0.000948723	0.679996	8.26176e-13
PID1	lightyellow	0.349679	0.00103677	0.621768	2.14382e-10
SSC5D	lightyellow	0.347862	0.00110566	0.546807	6.15649e-08
MPHOSPH6	lightyellow	-0.347173	0.00113287	-0.408219	0.000105212
RP11-672L10.6	lightyellow	0.346929	0.00114263	0.274225	0.0110953
ARMCX3	lightyellow	0.344053	0.00126378	0.663544	4.50168e-12
TMEM178A	lightyellow	0.343365	0.00129444	0.47353	4.71475e-06
PKD2	lightyellow	0.340475	0.00143072	0.583944	4.45993e-09
LMO2	lightyellow	0.338202	0.00154691	0.608753	6.37381e-10
OMD	lightyellow	0.337321	0.00159414	0.490923	1.84137e-06
PKDCC	lightyellow	0.337116	0.00160535	0.534384	1.38253e-07
ZNRF2	lightyellow	-0.336939	0.00161508	-0.497558	1.26877e-06
COLEC12	lightyellow	0.336235	0.0016542	0.649138	1.8252e-11
TRAK2	lightyellow	0.335593	0.00169068	0.639227	4.58207e-11
TRPC1	lightyellow	0.334009	0.00178374	0.57294	1.0044e-08
ZNF300P1	lightyellow	0.333551	0.00181151	0.382815	0.000299321
ISM1	lightyellow	0.332833	0.00185586	0.554789	3.59745e-08
NOSTRIN	lightyellow	0.332292	0.00188984	0.676909	1.14514e-12
EPS8	lightyellow	0.331447	0.00194413	0.645472	2.57571e-11
ZNF296	lightyellow	-0.330699	0.00199338	-0.519427	3.51071e-07
ZNF667-AS1	lightyellow	0.329644	0.00206467	0.399775	0.000150333
C3orf18	lightyellow	0.32927	0.00209054	0.465562	7.13134e-06
RAMP2	lightyellow	0.323172	0.00255482	0.633971	7.36635e-11
TLR4	lightyellow	0.32202	0.00265224	0.635187	6.60528e-11
RELN	lightyellow	0.321173	0.00272603	0.546862	6.13408e-08
BEST4	lightyellow	-0.320595	0.00277739	-0.426307	4.74045e-05
MMRN1	lightyellow	0.320414	0.00279364	0.549849	5.02505e-08
SUSD5	lightyellow	0.319558	0.00287176	0.426678	4.6614e-05
PPAP2A	lightyellow	0.319271	0.00289837	0.569336	1.30202e-08
CCNE1	lightyellow	-0.318838	0.00293894	-0.538995	1.02786e-07
ZNF542P	lightyellow	0.313638	0.00346769	0.353368	0.000908686
FGF14-AS2	lightyellow	0.308115	0.0041208	0.365815	0.0005756
ITIH5	lightyellow	0.307833	0.00415689	0.552446	4.21817e-08
RP4-545K15.5	lightyellow	0.303454	0.00475499	0.593183	2.20302e-09
KRT73	lightyellow	-0.301908	0.00498368	-0.298055	0.00559674
IRX1	lightyellow	0.300432	0.0052111	0.540715	9.19205e-08
HOXC4	lightyellow	0.296426	0.00587548	0.439504	2.57324e-05
PTPRM	lightyellow	0.290311	0.00703443	0.589072	3.02354e-09
MSX1	lightyellow	0.289983	0.00710175	0.43982	2.53503e-05
FZD4	lightyellow	0.289662	0.00716841	0.591336	2.54112e-09
CYP4X1	lightyellow	0.288777	0.007355	0.465138	7.28794e-06
CXCL12	lightyellow	0.287849	0.00755502	0.718197	1.01963e-14
VEZF1	lightyellow	0.287638	0.00760126	0.575192	8.52755e-09
HOXB2	lightyellow	0.28716	0.00770678	0.249649	0.0212121
AKAP12	lightyellow	0.286698	0.00780984	0.568677	1.36476e-08
SHE	lightyellow	0.284943	0.00821311	0.596341	1.72227e-09
AK021804	lightyellow	0.279606	0.00955366	0.514805	4.64092e-07
TCF7L2	lightyellow	0.278408	0.00987969	0.588616	3.13078e-09
LINC00667	lightyellow	0.278175	0.009944	0.319152	0.00290953
TSPAN18	lightyellow	0.277657	0.0100888	0.559988	2.51574e-08
LCA5	lightyellow	0.276943	0.0102914	0.538119	1.08779e-07
LDB2	lightyellow	0.276448	0.010434	0.600316	1.25852e-09
ZIC2	lightyellow	-0.276305	0.0104755	-0.366758	0.000555603
GAS1	lightyellow	0.274829	0.0109122	0.511255	5.73426e-07
FAM86A	lightyellow	-0.271433	0.0119775	-0.281703	0.00900562
FAM46A	lightyellow	0.270919	0.0121466	0.369388	0.000503162
TMEM150C	lightyellow	0.270452	0.0123017	0.540187	9.51335e-08
CADPS2	lightyellow	0.269583	0.0125954	0.607376	7.13178e-10
FBLN7	lightyellow	0.268411	0.0130007	0.494518	1.5063e-06
KBTBD12	lightyellow	0.265931	0.0138964	0.315014	0.00332013
PALB2	lightyellow	-0.263984	0.0146366	-0.303447	0.00475594
MAGI2-AS3	lightyellow	0.262982	0.0150305	0.656189	9.28678e-12
CTC-471J1.2	lightyellow	0.262458	0.0152402	0.335653	0.00168727
ENPP1	lightyellow	0.261043	0.0158193	0.575374	8.41493e-09
ZNF667	lightyellow	0.257409	0.0173936	0.311874	0.00366549
GPM6B	lightyellow	0.256231	0.0179323	0.455779	1.16884e-05
HSD17B11	lightyellow	0.255591	0.0182306	0.566641	1.57755e-08
TRAM2-AS1	lightyellow	0.255391	0.018325	0.386216	0.000261482
C14orf37	lightyellow	0.249334	0.0213812	0.431199	3.79087e-05
PVRL3	lightyellow	0.249308	0.0213953	0.515643	4.4132e-07
PRKAR2B	lightyellow	0.249155	0.0214779	0.556635	3.17055e-08
CCDC50	lightyellow	0.248885	0.0216245	0.578902	6.4941e-09
ZFPM2	lightyellow	0.248055	0.0220797	0.530717	1.74474e-07
FAM3B	lightyellow	0.244607	0.0240602	0.403349	0.000129405
LOC284825	lightyellow	0.242515	0.0253341	0.43421	3.2979e-05
PLSCR4	lightyellow	0.240899	0.0263569	0.620123	2.4673e-10
FAT4	lightyellow	0.237967	0.0283026	0.599643	1.32749e-09
IL1R1	lightyellow	0.235793	0.0298219	0.512291	5.39227e-07
GPC3	lightyellow	0.235771	0.029838	0.631147	9.47188e-11
NHS	lightyellow	0.233724	0.0313315	0.520136	3.36237e-07
CLCN6	lightyellow	0.233136	0.0317724	0.495521	1.42362e-06
ETNK2	lightyellow	0.232822	0.0320096	0.220362	0.042709
MXRA5	lightyellow	0.231121	0.0333221	0.496407	1.35419e-06
AP4E1	lightyellow	-0.228294	0.0356024	-0.286633	0.00782458
RLF	lightyellow	-0.227162	0.0365516	-0.435003	3.17843e-05
ABCC9	lightyellow	0.226066	0.0374905	0.632849	8.14288e-11
RELL1	lightyellow	0.225893	0.0376411	0.33119	0.00196096
RP11-521I2.3	lightyellow	-0.224938	0.0384778	-0.290788	0.00693721
ZKSCAN4	lightyellow	-0.223513	0.0397564	-0.22978	0.0343882
CD248	lightyellow	0.219077	0.0439648	0.450515	1.5154e-05
CA5B	lightyellow	0.216789	0.0462759	0.393191	0.000197277
CTD-2540F13.2	lightyellow	-0.214885	0.0482744	-0.237133	0.0288771
NUDT6	lightyellow	0.21406	0.0491619	0.572518	1.03557e-08
ZNF222	lightyellow	0.212408	0.0509807	0.240264	0.0267683
MOCS3	lightyellow	-0.212262	0.0511437	-0.449169	1.61833e-05
SLC23A1	lightyellow	-0.210083	0.0536329	-0.289682	0.0071643
C2orf27A	lightyellow	0.208372	0.0556564	0.334075	0.00177982
LOC153682	lightyellow	0.207121	0.057176	0.275284	0.010776
GPX2	lightyellow	-0.200293	0.0660706	-0.310657	0.00380771
FOLR2	lightyellow	0.20003	0.0664349	0.532384	1.57017e-07
ZNF521	lightyellow	0.196988	0.0707629	0.61327	4.39133e-10
FAM162B	lightyellow	0.196452	0.0715485	0.472234	5.04648e-06
PCDHGA4	lightyellow	0.193453	0.0760728	0.327164	0.0022415
RP11-524D16__A.3	lightyellow	0.191958	0.0784133	0.44541	1.94151e-05
PPFIA1	lightyellow	-0.191459	0.0792069	-0.299611	0.0053416
CPE	lightyellow	0.188627	0.0838341	0.578776	6.55456e-09
PRG4	lightyellow	0.18825	0.0844654	0.344014	0.0012655
PCDHGA10	lightyellow	0.187652	0.0854759	0.273069	0.0114534
NDFIP1	lightyellow	0.18684	0.0868627	0.589879	2.84227e-09
LOC100996740	lightyellow	0.186086	0.0881658	0.415742	7.59353e-05
GRM3	lightyellow	0.175707	0.107726	0.287999	0.00752233
OSR2	lightyellow	0.173847	0.111564	0.434881	3.19659e-05
PDGFD	lightyellow	0.165239	0.130717	0.609134	6.17779e-10
PEAK1	lightyellow	0.163617	0.134591	0.544256	7.28869e-08
RP11-539G18.2	lightyellow	0.15955	0.144686	0.260634	0.0159902
LNP1	lightyellow	-0.158643	0.147014	-0.268346	0.0130237
AADAT	lightyellow	0.155184	0.156146	0.400054	0.000148595
TBX18	lightyellow	0.153929	0.159563	0.433943	3.33909e-05
MRAP2	lightyellow	0.153469	0.160829	0.246131	0.0231669
MEOX1	lightyellow	0.15055	0.169038	0.436293	2.99265e-05
SHISA3	lightyellow	0.14922	0.172879	0.331607	0.00193379
GPR34	lightyellow	0.148579	0.174752	0.503115	9.23111e-07
LPL	lightyellow	0.145456	0.184093	0.481588	3.06949e-06
FTO	lightyellow	0.140859	0.198496	0.393709	0.000193145
GNE	lightyellow	0.139032	0.20444	0.374706	0.000410696
LSG1	lightyellow	-0.138983	0.204599	-0.269973	0.0124627
TMEM109	lightyellow	0.138979	0.204614	0.254121	0.0189324
ZEB1-AS1	lightyellow	0.13884	0.20507	0.271869	0.0118361
RIPK4	lightyellow	-0.138086	0.207567	-0.345372	0.00120684
ELN	lightyellow	0.13108	0.231785	0.289858	0.00712779
FABP4	lightyellow	0.127424	0.245179	0.437889	2.77684e-05
WTIP	lightyellow	0.123739	0.259205	0.290743	0.0069462
CLEC14A	lightyellow	0.123015	0.262026	0.420132	6.25523e-05
C17orf75	lightyellow	-0.116831	0.286951	-0.204214	0.0608355
ZNF385B	lightyellow	0.11579	0.291297	0.17862	0.101924
TUBBP5	lightyellow	-0.115462	0.292677	-0.242445	0.0253776
ZNF415	lightyellow	0.115401	0.292933	0.145991	0.182467
PLCB1	lightyellow	0.11147	0.309794	0.389661	0.000227689
ACKR4	lightyellow	0.0896147	0.41472	0.230606	0.0337278
LOC102723886	lightyellow	0.0805564	0.463626	0.227908	0.0359237
BRWD1-IT2	lightyellow	-0.0732373	0.505339	-0.242909	0.0250901
RHOU	lightyellow	0.0648552	0.55539	0.233595	0.0314277
TMEM176A	lightyellow	0.061691	0.574882	0.429811	4.04052e-05
HAS2	lightyellow	0.0398911	0.716996	0.301356	0.00506773
AP001462.6	lightyellow	-0.0370761	0.736208	-0.229345	0.0347398
PDE5A	lightyellow	-0.0345714	0.753439	0.337986	0.00155834
SMOC2	lightyellow	-0.0188911	0.863749	0.4293	4.13613e-05
LOC440416	lightyellow	0.0144238	0.89576	0.238331	0.0280542
CNOT10	lightyellow	-0.00567281	0.958906	-0.236645	0.0292184
CCL23	lightyellow	-0.00448831	0.967481	0.180284	0.0987213
XPNPEP2	lightyellow	-0.00434788	0.968498	0.466278	6.8741e-06

## Sheet: Supplementary Table 4
Supplementary Table 4. Genes in the module 5 for cSCC in the GSE108008 dataset
geneSymbol	moduleColor	GS.cSCC	p.GS.cSCC	MM.grey60	p.MM.grey60
METTL7A	grey60	-0.838004	1.41202e-08	-0.86568	1.33721e-09
NRG1	grey60	0.828709	2.8288e-08	0.824738	3.75953e-08
ARHGEF26	grey60	-0.820803	4.94915e-08	-0.866721	1.21169e-09
PHGDH	grey60	-0.81564	7.0289e-08	-0.885272	1.79565e-10
SGIP1	grey60	0.814674	7.49679e-08	0.757505	1.95849e-06
MDFI	grey60	0.811965	8.96409e-08	0.757457	1.96314e-06
MMP1	grey60	0.81172	9.10872e-08	0.880479	3.0297e-10
GALNT2	grey60	0.796062	2.4242e-07	0.850254	5.27288e-09
PTHLH	grey60	0.784213	4.81639e-07	0.882619	2.40534e-10
PTK7	grey60	0.78372	4.9515e-07	0.785056	4.59325e-07
CA13	grey60	-0.779967	6.09701e-07	-0.765542	1.30907e-06
PXN	grey60	0.777342	7.03559e-07	0.932299	1.9298e-13
SULF1	grey60	0.775731	7.67503e-07	0.796604	2.34674e-07
EDNRB	grey60	-0.775374	7.82342e-07	-0.791499	3.17414e-07
ACOT9	grey60	0.772438	9.14742e-07	0.818155	5.93282e-08
ATL1	grey60	-0.767358	1.19255e-06	-0.718921	1.11588e-05
NXN	grey60	0.766231	1.2637e-06	0.752791	2.46301e-06
MET	grey60	0.761686	1.59127e-06	0.854613	3.63594e-09
AGRN	grey60	0.760856	1.65879e-06	0.763603	1.44472e-06
GRN	grey60	0.759372	1.78593e-06	0.857997	2.70188e-09
GATM	grey60	-0.758385	1.87537e-06	-0.910393	7.44324e-12
ERP44	grey60	0.756524	2.05505e-06	0.89382	6.65203e-11
CANT1	grey60	0.752865	2.45425e-06	0.859914	2.27572e-09
IL24	grey60	0.75143	2.629e-06	0.851025	4.94158e-09
MTHFD1L	grey60	0.745082	3.54514e-06	0.707112	1.79816e-05
ELF4	grey60	0.741313	4.21667e-06	0.78083	5.81405e-07
SAT1	grey60	0.735299	5.52807e-06	0.850707	5.07553e-09
NCS1	grey60	0.735127	5.57033e-06	0.803968	1.49498e-07
SCRN1	grey60	0.735026	5.59544e-06	0.785982	4.35903e-07
NID1	grey60	0.733187	6.06932e-06	0.878406	3.77304e-10
IL34	grey60	-0.732034	6.38439e-06	-0.821662	4.66331e-08
PGRMC2	grey60	-0.730368	6.86573e-06	-0.736965	5.1323e-06
KLK1	grey60	-0.728853	7.33164e-06	-0.761831	1.57971e-06
CDON	grey60	-0.727579	7.7454e-06	-0.775929	7.59371e-07
PON3	grey60	-0.726762	8.02137e-06	-0.718881	1.11771e-05
PDP1	grey60	0.723114	9.36584e-06	0.872647	6.80157e-10
CD36	grey60	-0.719536	1.08776e-05	-0.788911	3.68774e-07
F11R	grey60	0.715875	1.26483e-05	0.837432	1.47552e-08
POU2F3	grey60	-0.715463	1.28629e-05	-0.901113	2.66091e-11
MMP10	grey60	0.712054	1.47688e-05	0.844393	8.53589e-09
TES	grey60	0.709896	1.6102e-05	0.848699	6.00317e-09
RIC3	grey60	-0.709866	1.61214e-05	-0.779522	6.24785e-07
PDPN	grey60	0.708608	1.69483e-05	0.851813	4.62276e-09
NAV1	grey60	0.707537	1.76824e-05	0.80144	1.7489e-07
LIMA1	grey60	0.70722	1.7905e-05	0.815772	6.96707e-08
ITM2A	grey60	-0.706178	1.86548e-05	-0.771286	9.72029e-07
ANKS6	grey60	0.706081	1.87262e-05	0.802332	1.65522e-07
FMNL2	grey60	0.704284	2.00901e-05	0.813924	7.87953e-08
AKIP1	grey60	0.703581	2.06475e-05	0.762759	1.50771e-06
SHC1	grey60	0.700607	2.3161e-05	0.847532	6.61103e-09
VAV2	grey60	0.699795	2.38938e-05	0.91537	3.54608e-12
MYBL2	grey60	0.696898	2.66792e-05	0.895605	5.34902e-11
PDLIM1	grey60	0.696365	2.72224e-05	0.860404	2.17718e-09
GATA3	grey60	-0.692988	3.08989e-05	-0.838519	1.35697e-08
CAT	grey60	-0.692236	3.17759e-05	-0.882812	2.3552e-10
AR	grey60	-0.688858	3.59943e-05	-0.817722	6.10971e-08
NFIC	grey60	-0.685699	4.03867e-05	-0.706031	1.8763e-05
IRX3	grey60	-0.685463	4.07333e-05	-0.796765	2.32412e-07
TFAP2B	grey60	-0.684815	4.16974e-05	-0.767582	1.17887e-06
ZBTB7B	grey60	-0.68451	4.21597e-05	-0.822231	4.48244e-08
CSRNP3	grey60	-0.683771	4.32968e-05	-0.71632	1.24203e-05
LINC00941	grey60	0.6825	4.5316e-05	0.719187	1.10364e-05
DOCK5	grey60	0.680833	4.80908e-05	0.693368	3.04635e-05
CORO6	grey60	0.679322	5.07359e-05	0.853472	4.01198e-09
PTN	grey60	-0.676898	5.52542e-05	-0.654778	0.000116224
RAPGEF1	grey60	0.676078	5.68614e-05	0.848681	6.0123e-09
TNC	grey60	0.672785	6.37428e-05	0.859874	2.28408e-09
MMP14	grey60	0.668814	7.30226e-05	0.808693	1.10826e-07
PXDN	grey60	0.66713	7.73092e-05	0.832716	2.10748e-08
LOC654342	grey60	0.664199	8.53052e-05	0.765299	1.32541e-06
RC3H2	grey60	0.664017	8.58253e-05	0.80905	1.08312e-07
KIRREL	grey60	0.663589	8.70595e-05	0.873162	6.45964e-10
LOXL2	grey60	0.660736	9.56949e-05	0.747627	3.14799e-06
LPCAT1	grey60	0.658538	0.000102857	0.816036	6.84492e-08
MSN	grey60	0.658455	0.000103136	0.850902	4.99305e-09
BMP1	grey60	0.656478	0.000110001	0.800066	1.90286e-07
ADAM12	grey60	0.654144	0.000118622	0.770033	1.03798e-06
COMP	grey60	-0.653917	0.00011949	-0.616089	0.000373343
IGF2BP2	grey60	0.653113	0.000122618	0.800031	1.90698e-07
C16orf74	grey60	0.650069	0.000135121	0.676628	5.57779e-05
TSPAN1	grey60	0.648218	0.000143268	0.842427	9.98916e-09
GAN	grey60	-0.646223	0.000152531	-0.794176	2.71213e-07
CLVS1	grey60	-0.645421	0.000156404	-0.684968	4.14678e-05
ADM	grey60	0.643721	0.000164898	0.717491	1.18371e-05
SSH1	grey60	0.642531	0.000171086	0.756761	2.03135e-06
XPR1	grey60	0.642437	0.00017158	0.781701	5.54083e-07
SSBP2	grey60	-0.641847	0.000174731	-0.781481	5.60887e-07
FAM234B	grey60	-0.641243	0.000178009	-0.831653	2.28026e-08
UHMK1	grey60	0.640643	0.000181321	0.703498	2.07137e-05
PRNP	grey60	0.639696	0.000186659	0.774926	8.01335e-07
NMNAT3	grey60	-0.639505	0.000187752	-0.626227	0.000279129
FEM1A	grey60	-0.639099	0.000190096	-0.659803	9.86797e-05
CDC25B	grey60	0.638587	0.000193085	0.815709	6.99629e-08
CDK6	grey60	0.637793	0.000197805	0.839579	1.24978e-08
PLK1	grey60	0.632305	0.00023332	0.730988	6.68285e-06
AXIN2	grey60	-0.626764	0.000274781	-0.761292	1.623e-06
CHP2	grey60	-0.626744	0.000274942	-0.758146	1.8976e-06
ERRFI1	grey60	0.62571	0.000283366	0.692352	3.16385e-05
SYNPO	grey60	0.624792	0.000291037	0.678409	5.23975e-05
MAML3	grey60	-0.624553	0.000293063	-0.806328	1.28869e-07
PDGFA	grey60	0.623616	0.000301132	0.765876	1.28688e-06
CALU	grey60	0.622676	0.000309411	0.860237	2.21034e-09
MYO9B	grey60	0.620374	0.000330558	0.808714	1.10674e-07
AK3	grey60	-0.619259	0.000341256	-0.781562	5.58355e-07
STXBP6	grey60	-0.618709	0.000346641	-0.714506	1.33744e-05
AKIRIN1	grey60	0.618038	0.000353319	0.762955	1.49287e-06
GALNT3	grey60	0.616773	0.000366201	0.736772	5.17675e-06
BCL6	grey60	-0.616129	0.000372919	-0.770333	1.02185e-06
UBE2Z	grey60	0.608894	0.000456203	0.796577	2.35061e-07
ABLIM1	grey60	-0.60438	0.000516074	-0.761451	1.61012e-06
HS3ST3A1	grey60	0.604333	0.000516729	0.658378	0.000103396
PAK1	grey60	0.601835	0.000552792	0.546519	0.00215926
PDZD2	grey60	-0.601219	0.000562016	-0.686467	3.92762e-05
NOTCH2	grey60	-0.601066	0.000564319	-0.835419	1.72034e-08
LSM12	grey60	0.598145	0.000610086	0.79583	2.45802e-07
KRT10	grey60	-0.596284	0.000640902	-0.838648	1.34346e-08
UAP1	grey60	0.591471	0.000727013	0.789156	3.63614e-07
EOGT	grey60	0.591172	0.000732692	0.694132	2.96061e-05
CXCL8	grey60	0.589497	0.000765172	0.735464	5.48766e-06
C2CD2	grey60	-0.587563	0.000804235	-0.653065	0.000122808
MFAP2	grey60	0.587174	0.000812286	0.797302	2.25038e-07
S100A6	grey60	0.587048	0.000814927	0.608323	0.000463423
EIF2AK4	grey60	0.585779	0.000841801	0.645283	0.000157079
SCP2	grey60	-0.582053	0.000925236	-0.655342	0.000114124
ITPK1	grey60	0.579078	0.000996957	0.780568	5.8989e-07
FEZ1	grey60	0.575353	0.00109354	0.729135	7.2428e-06
HUS1	grey60	0.572812	0.00116401	0.714557	1.33468e-05
PLXNB2	grey60	0.571858	0.00119148	0.573518	0.00114406
DAPK2	grey60	-0.571422	0.00120422	-0.723591	9.17938e-06
C5orf15	grey60	0.571046	0.0012153	0.703058	2.10711e-05
MRGBP	grey60	0.565597	0.00138613	0.852092	4.51428e-09
TRAM2	grey60	0.563046	0.00147302	0.765316	1.32429e-06
DLL1	grey60	0.558836	0.00162679	0.668953	7.26789e-05
AAED1	grey60	0.557905	0.00166262	0.746651	3.29531e-06
ANKRD52	grey60	0.555985	0.00173866	0.784493	4.74119e-07
RAPGEFL1	grey60	-0.555823	0.00174521	-0.804237	1.47005e-07
C5orf46	grey60	-0.553696	0.00183325	-0.572259	0.00117988
CDC20	grey60	0.553665	0.00183455	0.724774	8.73092e-06
ZNF281	grey60	0.551331	0.00193561	0.737876	4.92677e-06
CCR2	grey60	-0.549814	0.00200383	-0.490756	0.00687094
HCFC1	grey60	0.549811	0.00200398	0.657853	0.000105184
MRM2	grey60	0.549464	0.00201988	0.742681	3.9608e-06
C9orf64	grey60	0.548662	0.00205707	0.772466	9.13384e-07
GSTA3	grey60	-0.548386	0.00206998	-0.62502	0.000289118
NDRG1	grey60	0.54093	0.00244669	0.601444	0.000558621
KDELR1	grey60	0.536095	0.00272144	0.798051	2.1509e-07
SECISBP2L	grey60	-0.529451	0.003142	-0.655859	0.00011223
SPRY4	grey60	0.528838	0.00318346	0.609	0.000454867
SESN1	grey60	-0.527279	0.00329107	-0.63071	0.000244648
NEB	grey60	-0.523832	0.00354009	-0.59117	0.000732724
IGF2BP3	grey60	0.52307	0.00359726	0.736694	5.19489e-06
PARP1	grey60	0.522725	0.0036234	0.712577	1.44606e-05
MAD2L2	grey60	0.522009	0.00367825	0.806142	1.30393e-07
PCP4L1	grey60	-0.521292	0.00373377	-0.730001	6.97613e-06
UNC13B	grey60	-0.518246	0.00397795	-0.756526	2.05482e-06
P3H1	grey60	0.517802	0.0040147	0.724095	8.98588e-06
EEF1DP3	grey60	-0.511806	0.00453958	-0.68397	4.29875e-05
SAR1A	grey60	0.511722	0.00454729	0.697725	2.58557e-05
CDC45	grey60	0.509498	0.00475668	0.686031	3.99033e-05
CHCHD3	grey60	0.506746	0.00502699	0.625128	0.000288209
SYNJ2	grey60	0.5055	0.00515364	0.641726	0.000175383
ELP5	grey60	0.503613	0.00535064	0.804425	1.45284e-07
KIF2C	grey60	0.502036	0.00552009	0.703446	2.07561e-05
KAT6A	grey60	-0.501226	0.00560891	-0.711174	1.52996e-05
ANO4	grey60	0.499961	0.00575007	0.442123	0.0163321
SNHG15	grey60	0.497302	0.00605662	0.74172	4.13895e-06
DHRS3	grey60	-0.497169	0.00607234	-0.677119	5.48266e-05
KIF3C	grey60	0.496296	0.0061762	0.713065	1.41784e-05
TREM1	grey60	0.48929	0.00706553	0.79212	3.06108e-07
AJAP1	grey60	0.488024	0.00723721	0.56876	0.00128459
TXNDC12	grey60	0.484087	0.00779414	0.781248	5.68156e-07
ARCN1	grey60	0.479615	0.00847003	0.699011	2.46206e-05
SPIN1	grey60	0.477443	0.00881573	0.766246	1.26275e-06
SPECC1	grey60	0.476584	0.00895572	0.65531	0.000114242
BARX2	grey60	-0.471568	0.009811	-0.456846	0.0127265
TSPAN17	grey60	0.470706	0.00996459	0.574262	0.00112333
CASC2	grey60	0.46575	0.0108878	0.664622	8.41063e-05
PDCD6IP	grey60	-0.465542	0.010928	-0.570066	0.00124459
UGDH	grey60	0.461388	0.0117586	0.72052	1.04417e-05
EEF2K	grey60	-0.453563	0.0134667	-0.588227	0.000790627
EHD2	grey60	0.450465	0.0141978	0.659955	9.81859e-05
DERL1	grey60	0.449272	0.0144882	0.678668	5.1921e-05
MMP13	grey60	0.447149	0.0150167	0.621651	0.000318675
CCL21	grey60	0.443292	0.0160179	0.35391	0.0596317
TROAP	grey60	0.443023	0.0160899	0.582585	0.000912889
GPR107	grey60	0.443004	0.0160948	0.545117	0.00222845
FLII	grey60	0.439316	0.0171076	0.624771	0.000291217
C1orf226	grey60	0.439116	0.0171639	0.333414	0.0771474
KXD1	grey60	0.437	0.01777	0.786735	4.17679e-07
SPHK1	grey60	0.436835	0.0178177	0.615856	0.000375807
PSAT1	grey60	-0.43622	0.0179976	-0.391997	0.0354553
PROS1	grey60	-0.435002	0.0183582	-0.649459	0.000137762
KDELR2	grey60	0.434923	0.0183819	0.743942	3.73726e-06
DDR1	grey60	0.434582	0.0184838	0.412292	0.0262486
HDAC5	grey60	-0.434164	0.0186097	-0.420571	0.0231021
NEMP1	grey60	0.432642	0.0190738	0.692626	3.13176e-05
ARFGAP3	grey60	0.431237	0.0195106	0.621521	0.000319876
NYNRIN	grey60	-0.428207	0.0204807	-0.433004	0.0189625
INIP	grey60	0.427673	0.0206555	0.68887	3.59784e-05
UBE2T	grey60	0.426764	0.0209564	0.612224	0.000416033
C15orf39	grey60	0.398701	0.0321643	0.357067	0.0572359
NUDT7	grey60	-0.396959	0.0329949	-0.408481	0.0278098
GFPT1	grey60	0.394938	0.0339796	0.706241	1.86088e-05
CLIC4	grey60	0.37689	0.0438681	0.629468	0.000253799
KRT9	grey60	-0.37028	0.0480163	-0.333631	0.0769433
SNRPB	grey60	0.365961	0.0508901	0.617771	0.000356
MAPK1	grey60	-0.363789	0.0523859	-0.536885	0.00267483
MT1L	grey60	0.355508	0.0584092	0.516838	0.00409541
TLX1	grey60	0.354082	0.0594988	0.347552	0.0646942
NAAA	grey60	-0.351978	0.0611361	-0.448847	0.0145926
TRIM13	grey60	-0.348855	0.0636304	-0.651921	0.000127384
HTRA3	grey60	0.343528	0.0680674	0.460086	0.0120295
HSD17B13	grey60	-0.343261	0.0682956	-0.405247	0.0291934
NDRG4	grey60	-0.34314	0.0683996	-0.328397	0.0819842
MARVELD1	grey60	0.343122	0.068415	0.573668	0.00113986
USP3	grey60	-0.33916	0.0718815	-0.567464	0.00132538
LOC283299	grey60	-0.339125	0.0719131	-0.54223	0.00237705
EFNA1	grey60	0.337503	0.073371	0.43551	0.0182071
SEZ6L2	grey60	0.318145	0.092584	0.607354	0.0004759
RHOB	grey60	0.317037	0.0937884	0.516797	0.00409882
PPT1	grey60	0.304238	0.108581	0.508798	0.00482425
ELFN1	grey60	0.29841	0.115865	0.548237	0.00207695
LNPEP	grey60	-0.279231	0.142397	-0.364855	0.0516475
CD1B	grey60	-0.27258	0.152552	-0.471812	0.0097679
IL11	grey60	0.2697	0.157108	0.492717	0.00661788
C9orf114	grey60	0.262568	0.168803	0.447175	0.0150102
LEMD1	grey60	0.254483	0.182791	0.410711	0.0268875
FN1	grey60	0.251815	0.18758	0.317106	0.0937137
G0S2	grey60	0.249474	0.191854	0.378604	0.0428409
RHBDD2	grey60	0.244092	0.201934	0.536766	0.00268179
BACE2	grey60	0.241753	0.206426	0.426968	0.0208886
LOC647859	grey60	-0.24001	0.209817	-0.363879	0.0523234
CDR2L	grey60	0.232169	0.225545	0.492768	0.00661141
GPR37	grey60	-0.225063	0.240467	-0.394109	0.034391
C9orf116	grey60	0.220961	0.249372	0.411462	0.0265822
IGBP1	grey60	-0.214449	0.26395	-0.367455	0.0498811
UPK1A-AS1	grey60	-0.212184	0.269149	-0.339361	0.0717027
PCDHB9	grey60	0.205417	0.285071	0.325286	0.0850976
SYPL1	grey60	-0.204403	0.287508	-0.440148	0.0168744
QPCTL	grey60	0.196683	0.306491	0.397018	0.0329665
NID2	grey60	0.189604	0.324569	0.359166	0.0556847
SPAG4	grey60	0.159862	0.407465	0.362182	0.0535145
PGM2L1	grey60	0.148808	0.441057	0.380505	0.0417231
KPNA7	grey60	0.14641	0.448534	0.473277	0.00951218
OTOL1	grey60	0.12894	0.505021	0.364706	0.0517502
PLAG1	grey60	0.127519	0.509764	0.313852	0.0973184
CMTM3	grey60	0.125701	0.515868	0.43455	0.0184934
MGAM	grey60	0.104197	0.590644	0.379468	0.0423298
SOX6	grey60	-0.000368827	0.998485	-0.299035	0.115067

## Sheet: Supplementary Table 5
Supplementary Table 5. Genes in the module 10 for AK in the GSE108008 dataset
geneSymbol	moduleColor	GS.AK	p.GS.AK	MM.black	p.MM.black
SYN2	black	0.595206	0.000659367	0.821498	4.71681e-08
C1orf158	black	0.577777	0.00102982	0.548277	0.00207507
AADACL4	black	0.562436	0.0014945	0.73991	4.49467e-06
COX5A	black	0.552558	0.00188192	0.539516	0.00252446
HSD17B2	black	0.540485	0.00247095	0.704422	1.99819e-05
NUS1	black	0.534229	0.00283434	0.605131	0.000505658
RNF141	black	-0.522632	0.00363051	-0.475289	0.00917029
PPARG	black	0.517674	0.00402533	0.880885	2.90083e-10
ZNF462	black	-0.517359	0.00405158	-0.51322	0.00441078
AGR2	black	0.506181	0.00508409	0.614318	0.000392396
OLAH	black	0.504423	0.00526535	0.792606	2.97503e-07
MIR4715	black	0.502789	0.00543866	0.522835	0.00361504
ACAA2	black	0.499474	0.00580522	0.8837	2.13709e-10
MGST1	black	0.497607	0.00602084	0.843677	9.04149e-09
C1orf210	black	0.489102	0.00709077	0.606743	0.00048392
REEP6	black	0.480189	0.00838067	0.928422	3.99803e-13
DGAT2L6	black	0.478275	0.00868189	0.956802	5.18379e-16
KRT79	black	0.47649	0.00897121	0.951439	2.43773e-15
ABHD5	black	0.47453	0.00929795	0.931501	2.24974e-13
SEC14L6	black	0.471016	0.00990905	0.96809	9.28771e-18
MOGAT2	black	0.469546	0.0101746	0.944213	1.51933e-14
DEXI	black	-0.466426	0.0107579	-0.468298	0.0104047
ACAT2	black	0.465099	0.0110143	0.916173	3.13335e-12
PLK2	black	-0.464284	0.0111742	-0.57185	0.00119171
UNC5B-AS1	black	0.462081	0.0116165	0.530647	0.00306244
PNPLA5	black	0.461601	0.0117148	0.946622	8.49286e-15
GAL	black	0.460164	0.0120131	0.956201	6.22415e-16
AWAT1	black	0.455585	0.0130068	0.965979	2.17814e-17
ELOVL4	black	0.454344	0.0132876	0.807511	1.19535e-07
MSMO1	black	0.450626	0.0141591	0.888232	1.28476e-10
CYB5A	black	0.449552	0.0144194	0.890162	1.02762e-10
SAMM50	black	0.449186	0.0145091	0.779343	6.30923e-07
MRPS25	black	0.448188	0.0147559	0.633541	0.000224864
PDGFC	black	-0.446495	0.0151827	-0.528163	0.00322964
ACLY	black	0.446476	0.0151876	0.582088	0.000924418
TIMP4	black	0.443545	0.0159506	0.91764	2.49088e-12
MPDU1	black	0.437981	0.0174867	0.52405	0.00352386
FA2H	black	0.435814	0.018117	0.93302	1.67724e-13
HACL1	black	0.435187	0.018303	0.942288	2.37412e-14
GPD1	black	0.430394	0.0197766	0.937518	6.74066e-14
MECR	black	0.430267	0.0198168	0.774077	8.38548e-07
TMEM147	black	0.426751	0.0209607	0.47388	0.00940869
CLSTN1	black	-0.425849	0.0212627	-0.646475	0.000151332
PGRMC1	black	0.42566	0.0213263	0.926226	5.93306e-13
GALNT12	black	-0.424884	0.0215896	-0.59022	0.000751002
NSDHL	black	0.42359	0.0220345	0.694797	2.88771e-05
PDZK1	black	0.423451	0.0220828	0.844457	8.49254e-09
CALD1	black	-0.422179	0.0225286	-0.515664	0.00419552
IRX6	black	0.420087	0.0232773	0.899356	3.33946e-11
ELOVL3	black	0.416773	0.0245049	0.973499	7.81335e-19
GK5	black	0.416226	0.0247125	0.780516	5.91586e-07
IL17RB	black	0.415976	0.0248078	0.524097	0.00352041
LOC389765	black	-0.412712	0.0260811	-0.553559	0.00183903
ACSM6	black	0.408131	0.027957	0.857852	2.73693e-09
C14orf1	black	0.406056	0.0288419	0.668314	7.42715e-05
PNPLA3	black	0.405745	0.0289769	0.811756	9.08719e-08
UBIAD1	black	0.404497	0.029522	0.944186	1.52873e-14
MFSD12	black	0.4019	0.0306831	0.628611	0.000260292
CMTM8	black	0.399973	0.0315685	0.672232	6.49684e-05
PDLIM5	black	-0.398867	0.0320861	-0.50832	0.00487084
MEST	black	0.398683	0.032173	0.368134	0.0494279
CHI3L1	black	0.398624	0.0322009	0.944257	1.50331e-14
OXA1L	black	0.398189	0.0324064	0.635132	0.000214377
MSRB1	black	0.397606	0.0326841	0.760271	1.70786e-06
SOAT1	black	0.39484	0.034028	0.926322	5.83364e-13
DDHD1	black	0.39328	0.0348056	0.807964	1.16122e-07
THRSP	black	0.391526	0.0356967	0.958201	3.35153e-16
DHCR24	black	0.390417	0.0362693	0.816698	6.54704e-08
PLIN2	black	0.389592	0.0367	0.94969	3.89004e-15
CRAT	black	0.389013	0.0370049	0.938259	5.76386e-14
FAR2	black	0.388032	0.037526	0.968178	8.95438e-18
PNLIPRP3	black	0.385926	0.0386649	0.579975	0.000974836
ADGRL3	black	0.385555	0.0388684	0.893918	6.57327e-11
EPAS1	black	-0.384593	0.0393997	-0.776981	7.17456e-07
COX8A	black	0.384445	0.0394823	0.543159	0.00232834
DAB2IP	black	-0.380489	0.041733	-0.727623	7.73085e-06
PDHB	black	0.380443	0.0417595	0.740475	4.38076e-06
SMDT1	black	0.376703	0.0439815	0.797639	2.20514e-07
RDH11	black	0.375207	0.0448964	0.875267	5.22097e-10
ACSL1	black	0.374832	0.0451278	0.943717	1.70706e-14
ZBTB4	black	-0.374823	0.0451334	-0.620428	0.000330053
KRTAP13-2	black	0.369851	0.0482955	0.52758	0.00327008
MTVR2	black	0.369836	0.0483053	0.490665	0.00688287
NTAN1	black	0.366521	0.0505103	0.869576	9.20643e-10
DACH1	black	0.364927	0.0515981	0.781598	5.57269e-07
SGK2	black	0.364613	0.0518142	0.965736	2.39447e-17
LOC100132111	black	0.364428	0.0519423	0.685207	4.1111e-05
AADACL3	black	0.363292	0.0527331	0.963127	6.34982e-17
PM20D1	black	0.36295	0.0529728	0.935106	1.1079e-13
AATBC	black	0.362135	0.053548	0.913107	4.99491e-12
AWAT2	black	0.36127	0.0541636	0.964391	3.99446e-17
SIRPA	black	-0.360784	0.054512	-0.598819	0.000599243
USP19	black	0.360071	0.0550267	0.385921	0.0386674
TDRD12	black	0.359532	0.0554179	0.463868	0.0112567
TF	black	0.35862	0.0560854	0.869555	9.22538e-10
TRHDE-AS1	black	0.358519	0.0561591	0.805576	1.35143e-07
TKT	black	0.357492	0.0569189	0.597215	0.000625307
HILPDA	black	0.357467	0.0569378	0.763053	1.48548e-06
CBR3-AS1	black	0.357008	0.0572798	0.54476	0.00224642
PGD	black	0.354506	0.0591732	0.405911	0.0289048
CREG1	black	0.354233	0.0593826	0.76254	1.52442e-06
DUSP16	black	0.353272	0.0601255	0.745691	3.4462e-06
LPIN1	black	0.352573	0.0606695	0.765749	1.29527e-06
DGAT2	black	0.351295	0.0616752	0.935092	1.11118e-13
PEX3	black	0.350942	0.0619554	0.804744	1.42408e-07
CIDEA	black	0.350258	0.0625001	0.930531	2.70393e-13
DHCR7	black	0.349854	0.0628239	0.94108	3.11786e-14
LOC100129550	black	-0.34823	0.0641391	-0.453027	0.0135909
EBP	black	0.347896	0.064412	0.781985	5.45414e-07
MC5R	black	0.346484	0.0655771	0.756568	2.05055e-06
HSPD1	black	0.34332	0.0682452	0.481294	0.00821076
MOGAT1	black	0.342891	0.068614	0.903275	2.00044e-11
TMEM91	black	0.341902	0.0694685	0.946873	7.98093e-15
DCAF1	black	0.341829	0.0695319	0.545424	0.00221318
AXDND1	black	0.341668	0.0696721	0.778565	6.58322e-07
PMVK	black	0.340543	0.0706569	0.846089	7.44078e-09
SOX7	black	0.339068	0.0719632	0.686094	3.9812e-05
DHRS11	black	0.336934	0.0738881	0.828307	2.91247e-08
ULK4	black	0.336906	0.0739132	0.744652	3.61658e-06
RPS15	black	0.336686	0.0741142	0.593211	0.000694781
KIAA0513	black	0.335969	0.0747707	0.607476	0.000474312
FDPS	black	0.332967	0.0775699	0.884569	1.94145e-10
HMGCS1	black	0.332277	0.0782239	0.844107	8.73464e-09
PNLDC1	black	0.331528	0.0789398	0.815217	7.23016e-08
ELOVL5	black	0.328862	0.081526	0.915333	3.56644e-12
GNPAT	black	0.328703	0.0816823	0.905741	1.43303e-11
ACOT1	black	0.327944	0.0824314	0.726869	7.98467e-06
TMEM97	black	0.327578	0.0827948	0.887263	1.43509e-10
CLMP	black	0.326759	0.083612	0.787269	4.05159e-07
BRI3BP	black	0.325765	0.0846122	0.920021	1.70033e-12
CTSV	black	0.324802	0.0855891	0.452026	0.0138255
HERPUD2	black	-0.324172	0.086234	-0.628448	0.000261541
ACSBG1	black	0.323739	0.0866787	0.9726	1.21954e-18
CST6	black	0.32328	0.0871525	0.872738	6.73993e-10
LETMD1	black	0.32162	0.0888807	0.571947	0.00118889
ACSM3	black	0.321513	0.0889931	0.923681	9.2364e-13
CNDP1	black	0.321243	0.0892772	0.852681	4.29328e-09
PECR	black	0.320625	0.0899296	0.970777	2.87814e-18
RGS9BP	black	0.320097	0.0904896	0.75602	2.10631e-06
LOC145783	black	0.318426	0.0922802	0.778115	6.74654e-07
RIMBP3B	black	0.317695	0.0930718	0.535652	0.00274789
CERS4	black	0.316475	0.0944041	0.795053	2.5745e-07
CLPSL2	black	0.315087	0.0959384	0.563705	0.00145014
ZNF385D	black	0.315016	0.0960169	0.649684	0.000136781
GLDC	black	0.314589	0.0964931	0.885523	1.74597e-10
NOX4	black	-0.312957	0.0983274	-0.648283	0.000142975
MERTK	black	0.311494	0.0999951	0.436226	0.0179958
PMPCB	black	0.308324	0.103681	0.543042	0.0023344
MPC2	black	0.306869	0.105406	0.836989	1.52644e-08
WISP1	black	-0.305553	0.106985	-0.546371	0.00216647
SGPP2	black	0.30434	0.108456	0.730075	6.95367e-06
FDFT1	black	0.301893	0.11147	0.738525	4.78493e-06
ELOVL1	black	0.30166	0.11176	0.74896	2.95649e-06
AHCYL1	black	0.300475	0.113244	0.59543	0.000655486
FADS2	black	0.299708	0.114212	0.934401	1.2766e-13
CPA6	black	-0.298756	0.115423	-0.54499	0.00223484
SPRR4	black	0.298375	0.11591	0.791973	3.08751e-07
UNG	black	0.298068	0.116304	0.538471	0.00258328
PEPD	black	0.297424	0.117132	0.581398	0.000940631
LPCAT3	black	0.29537	0.119806	0.864106	1.54978e-09
PCTP	black	0.293822	0.12185	0.780305	5.98474e-07
SHMT1	black	0.293465	0.122325	0.79105	3.25839e-07
TTC39B	black	0.293323	0.122514	0.751491	2.62141e-06
ETFDH	black	0.292901	0.123079	0.614283	0.000392786
SCAP	black	0.292426	0.123716	0.847655	6.54455e-09
FITM2	black	0.291811	0.124543	0.943822	1.66546e-14
UQCRC2	black	0.29163	0.124788	0.6458	0.000154562
GDE1	black	0.291214	0.125352	0.509015	0.00480315
TMEM254	black	0.290163	0.126784	0.847826	6.45317e-09
HMGCR	black	0.29007	0.126911	0.785321	4.52521e-07
PSAPL1	black	0.289399	0.127832	0.865784	1.3241e-09
DOPEY2	black	0.287647	0.13026	0.883909	2.0884e-10
DBT	black	0.28732	0.130718	0.726383	8.15264e-06
COX7B	black	0.286508	0.131858	0.5638	0.00144686
TRMT44	black	0.28307	0.136763	0.769342	1.07609e-06
ADTRP	black	0.28061	0.140354	0.944361	1.46707e-14
GK	black	0.279864	0.141457	0.430919	0.0196105
LRG1	black	0.279039	0.142684	0.826264	3.37314e-08
SEC14L4	black	0.275735	0.147673	0.865893	1.31054e-09
TLCD1	black	0.275715	0.147704	0.923424	9.65054e-13
MVD	black	0.275421	0.148153	0.856027	3.2146e-09
ARRDC4	black	-0.274941	0.14889	-0.537382	0.00264581
APOC1	black	0.274923	0.148918	0.881067	2.8447e-10
FH	black	0.27378	0.150682	0.532765	0.00292569
INSIG1	black	0.27257	0.152568	0.94289	2.06824e-14
DNASE1L2	black	0.272338	0.152931	0.839906	1.21834e-08
FASN	black	0.270419	0.155961	0.957335	4.39824e-16
FOSL2	black	-0.270373	0.156034	-0.45852	0.0123624
LOC100505666	black	0.269119	0.158038	0.554791	0.00178745
COX5B	black	0.268253	0.159432	0.788489	3.77828e-07
PDZK1P1	black	0.268012	0.159822	0.837777	1.43688e-08
EIF4E3	black	0.267719	0.160296	0.717841	1.16679e-05
C1orf122	black	0.267388	0.160833	0.669419	7.15346e-05
GPT2	black	0.265675	0.163635	0.643891	0.00016403
TM7SF2	black	0.261582	0.170466	0.840133	1.1969e-08
PTK2	black	-0.261424	0.170734	-0.697235	2.63408e-05
RARRES1	black	0.260793	0.171807	0.730431	6.847e-06
HS3ST6	black	0.260674	0.17201	0.807031	1.23241e-07
ABHD12B	black	0.260175	0.172862	0.77355	8.62369e-07
HAO2	black	0.259543	0.173946	0.915578	3.43478e-12
TSPAN6	black	0.258589	0.175591	0.759794	1.74895e-06
CHI3L2	black	0.257374	0.1777	0.570999	0.00121669
IGFL4	black	0.255745	0.180557	0.624825	0.000290761
PEX11A	black	0.255205	0.181511	0.685476	4.07135e-05
SEC31A	black	-0.254566	0.182645	-0.553687	0.00183361
ISOC1	black	0.254142	0.183399	0.84488	8.20748e-09
ZNF254	black	0.253237	0.185018	0.66237	9.06584e-05
ACSF2	black	0.252189	0.186904	0.581938	0.000927921
PHB2	black	0.251299	0.188517	0.838786	1.32914e-08
LRP3	black	0.251065	0.188942	0.589415	0.000766785
EGR2	black	0.250162	0.190592	0.662767	8.9473e-05
PCK2	black	0.246682	0.197039	0.593321	0.000692796
TMEM164	black	0.246659	0.197082	0.90006	3.05032e-11
MFAP3L	black	0.246556	0.197274	0.694123	2.9616e-05
ATG9B	black	0.246312	0.197734	0.717119	1.20195e-05
FADS1	black	0.245809	0.19868	0.919599	1.82102e-12
ZNF91	black	0.242672	0.204653	0.688707	3.61945e-05
RASAL1	black	0.242325	0.20532	0.600617	0.000571147
RNF165	black	0.241354	0.207199	0.650618	0.000132787
ACSS2	black	0.240337	0.209177	0.912492	5.47395e-12
MVK	black	0.238159	0.213461	0.864021	1.56213e-09
SMIM4	black	0.237992	0.213791	0.505432	0.00516067
CDKL2	black	0.236809	0.216144	0.764289	1.39536e-06
TST	black	0.23524	0.219292	0.705598	1.90842e-05
IGFL2	black	0.233573	0.22267	0.631261	0.000240684
KLHDC8B	black	0.229988	0.230057	0.755142	2.19833e-06
RORC	black	0.226536	0.237321	0.769477	1.06851e-06
TRIM55	black	0.225416	0.239709	0.776817	7.23835e-07
GPR1	black	-0.22499	0.240622	-0.453764	0.0134205
CCNDBP1	black	0.224765	0.241105	0.652714	0.000124198
FOXC1	black	0.22404	0.242666	0.83174	2.26567e-08
GGT6	black	0.223638	0.243536	0.800421	1.862e-07
ZNF43	black	0.223307	0.244251	0.760858	1.65865e-06
AGPAT3	black	0.222436	0.246144	0.88702	1.47523e-10
ADGRG2	black	0.221658	0.247844	0.67112	6.74987e-05
TRIL	black	0.221182	0.248886	0.737711	4.96348e-06
PLIN4	black	0.217789	0.256405	0.842745	9.73966e-09
ZNF532	black	-0.217165	0.257804	-0.488695	0.00714581
EGR3	black	0.215922	0.260605	0.752844	2.45679e-06
CS	black	0.215544	0.261461	0.821234	4.80391e-08
APMAP	black	0.211141	0.271565	0.882303	2.48938e-10
LINC01554	black	0.21037	0.273359	0.793008	2.90563e-07
PGM1	black	0.209992	0.274242	0.536783	0.00268076
VTRNA1-3	black	-0.209747	0.274816	-0.642797	0.000169682
SCAMP4	black	0.209048	0.276454	0.526387	0.00335402
FAXDC2	black	0.208031	0.278851	0.82039	5.09212e-08
HLCS	black	0.207197	0.280825	0.805703	1.34064e-07
ANTXR2	black	-0.207092	0.281074	-0.489532	0.0070331
XYLB	black	0.205433	0.285033	0.709748	1.61974e-05
PANK1	black	0.205266	0.285432	0.601375	0.000559663
MFSD5	black	0.204426	0.287453	0.723444	9.2363e-06
RPS6	black	0.203708	0.289185	0.646505	0.00015119
APOE	black	0.200073	0.298061	0.730481	6.83204e-06
DDT	black	0.199299	0.299973	0.614418	0.000391303
AGA	black	0.196302	0.307448	0.563943	0.00144196
TOMM5	black	0.195783	0.308754	0.394715	0.0340899
DHRS7B	black	0.19578	0.308762	0.758619	1.85378e-06
SRD5A3	black	0.1939	0.313523	0.537358	0.0026472
RLN1	black	0.191755	0.319008	0.476292	0.00900374
HADH	black	0.191555	0.319524	0.865378	1.37578e-09
PPARA	black	0.190187	0.323057	0.570326	0.00123678
SPIRE2	black	0.189514	0.324805	0.547017	0.00213514
ABHD6	black	0.189196	0.325632	0.836608	1.57162e-08
PDHA1	black	0.188569	0.327268	0.729369	7.16988e-06
TTC38	black	0.186454	0.332822	0.822188	4.49612e-08
LOC727896	black	0.184512	0.337972	-0.455041	0.0131292
ZBTB44	black	0.18423	0.338724	0.732704	6.19963e-06
TRAFD1	black	-0.181737	0.345414	-0.550694	0.00196399
RNF145	black	-0.178452	0.354349	-0.81306	8.3421e-08
ALCAM	black	0.17725	0.357652	0.521441	0.00372221
ZNRF4	black	0.175409	0.362748	0.556599	0.00171404
EFNB2	black	0.174023	0.366613	0.591053	0.00073496
UBE2QL1	black	0.172078	0.372076	0.805601	1.34933e-07
NDRG3	black	-0.169051	0.380672	-0.461721	0.0116901
GPR27	black	0.166021	0.389392	0.598802	0.000599516
GPT	black	0.165807	0.390014	0.828554	2.86072e-08
SMIM3	black	-0.164134	0.39488	-0.677266	5.45465e-05
BCKDK	black	0.164105	0.394965	0.562032	0.00150888
HSD11B1	black	0.16328	0.397378	0.903624	1.90925e-11
RNF167	black	0.158631	0.411132	0.490153	0.0069505
SSSCA1-AS1	black	0.157255	0.415254	0.576818	0.00105463
NHSL2	black	0.157152	0.415566	0.703451	2.07519e-05
GATA6	black	0.155282	0.421205	0.844048	8.77664e-09
LINC00885	black	0.151621	0.432369	0.67523	5.85658e-05
NDP	black	0.150919	0.43453	0.588622	0.000782625
PIR-FIGF	black	0.149634	0.438495	0.617167	0.000362147
ADGRB1	black	0.141797	0.463112	0.748241	3.05837e-06
INPPL1	black	0.140938	0.465853	0.48186	0.00812481
HIVEP2	black	-0.140503	0.467244	-0.698559	2.50487e-05
UNC5B	black	0.13688	0.478919	0.655553	0.000113346
CPB2-AS1	black	0.136374	0.480563	0.637929	0.000196988
ANO10	black	0.135852	0.482259	0.741154	4.2473e-06
DUSP28	black	0.134394	0.487017	0.612722	0.000410307
ANKRD29	black	-0.130509	0.499807	-0.507434	0.00495824
RBM47	black	0.127384	0.510218	0.55215	0.00189962
IFITM1	black	-0.12531	0.517185	-0.575903	0.00107878
EEF1G	black	0.121697	0.52943	0.640127	0.000184215
ACER2	black	0.114635	0.553763	0.55494	0.00178131
RNF24	black	0.110305	0.568932	0.732442	6.27132e-06
TMEM238	black	0.110017	0.569949	0.44387	0.0158645
ABTB2	black	0.108153	0.57654	0.641938	0.000174245
CYB5B	black	-0.106544	0.582259	-0.533371	0.00288759
RPL10A	black	0.100441	0.60417	0.616975	0.000364119
TRIP10	black	-0.0977279	0.614022	-0.618561	0.000348109
NNAT	black	0.09655	0.618319	0.837244	1.49699e-08
PEBP1	black	0.089628	0.643821	0.686105	3.97966e-05
TRAPPC6A	black	0.0873921	0.652145	0.656748	0.000109038
CDC42EP3	black	-0.0837747	0.6657	-0.481528	0.00817505
MPZL1	black	-0.0813596	0.674807	-0.72511	8.60703e-06
PRDX2	black	0.0777316	0.688573	0.755552	2.15492e-06
PRRT3-AS1	black	-0.0767216	0.692423	0.432881	0.0190002
ANO9	black	-0.075519	0.697017	0.504481	0.0052593
KLF15	black	0.0731288	0.706179	0.542719	0.00235129
AACS	black	0.0725118	0.70855	0.756179	2.08996e-06
PEA15	black	-0.0610567	0.753042	-0.573893	0.00113357
PHACTR2	black	-0.060719	0.754366	-0.589729	0.000760605
MIR1264	black	0.055097	0.77651	0.469641	0.0101572
SIGMAR1	black	0.0400933	0.836405	0.406616	0.0286012
ECHDC2	black	0.0248924	0.898012	0.636606	0.000205051
RALGPS1	black	0.0217717	0.910744	0.70305	2.10773e-05
LCN1	black	0.019194	0.921277	0.4685	0.010367
WASH3P	black	-0.0181495	0.925549	0.449619	0.0144032
APOOL	black	-0.0126238	0.948179	0.652397	0.000125463
ABHD14B	black	0.00250627	0.989705	0.688167	3.6917e-05

## Sheet: Supplementary Table 6
Supplementary Table 6. Genes in the module 7 for normal sample in the GSE108008 dataset
geneSymbol	moduleColor	GS.normal	p.GS.normal	MM.green	p.MM.green
HLF	green	0.798324	2.11569e-07	0.813902	7.89065e-08
DKK2	green	0.753083	2.42859e-06	0.845023	8.11291e-09
STK17A	green	-0.747235	3.20643e-06	-0.738773	4.73183e-06
NFIX	green	0.746598	3.30347e-06	0.780637	5.8765e-07
KIT	green	0.742931	3.91561e-06	0.775773	7.65751e-07
PAIP2B	green	0.741153	4.24751e-06	0.757909	1.9199e-06
TNXB	green	0.739288	4.62303e-06	0.872613	6.8247e-10
DAAM2	green	0.735559	5.46445e-06	0.860994	2.06377e-09
PRELP	green	0.733896	5.88245e-06	0.854664	3.61998e-09
GALNT16	green	0.7331	6.09248e-06	0.83271	2.10846e-08
COBL	green	0.725917	8.31627e-06	0.801154	1.78001e-07
TNXA	green	0.724919	8.67739e-06	0.841186	1.10196e-08
MXD1	green	-0.720581	1.04151e-05	-0.875071	5.32641e-10
KRT77	green	0.71675	1.22031e-05	0.865339	1.38089e-09
UPP1	green	-0.712621	1.44352e-05	-0.806116	1.30613e-07
GSN	green	0.708728	1.68682e-05	0.811618	9.16957e-08
SYNPO2	green	0.705452	1.91938e-05	0.857101	2.92485e-09
HMGCS2	green	0.704095	2.02386e-05	0.803347	1.5541e-07
MAP1B	green	0.700418	2.33297e-05	0.73278	6.17898e-06
SMOC2	green	0.697187	2.63893e-05	0.788202	3.84101e-07
TNS1	green	0.691693	3.24226e-05	0.923979	8.77643e-13
PODN	green	0.691633	3.2494e-05	0.920653	1.53363e-12
PLAGL1	green	0.684907	4.15602e-05	0.81231	8.76379e-08
NDNF	green	0.682399	4.54791e-05	0.772014	9.35457e-07
PTGIS	green	0.681608	4.67816e-05	0.845111	8.05541e-09
USB1	green	-0.681244	4.73929e-05	-0.803931	1.49849e-07
CHPT1	green	0.680747	4.8238e-05	0.875526	5.08448e-10
ARFGEF3	green	0.676501	5.60271e-05	0.843049	9.50699e-09
HDAC1	green	-0.676442	5.61425e-05	-0.837989	1.41359e-08
APOD	green	0.675228	5.85695e-05	0.918737	2.09219e-12
CD34	green	0.673506	6.21763e-05	0.84667	7.09563e-09
KRT72	green	0.672695	6.39413e-05	0.680419	4.88028e-05
CRY2	green	0.672382	6.46344e-05	0.702777	2.13013e-05
HBEGF	green	-0.672099	6.52668e-05	-0.747136	3.22143e-06
IRAK1	green	-0.669841	7.05135e-05	-0.728781	7.35447e-06
NFIB	green	0.669742	7.0753e-05	0.799027	2.02727e-07
CYBRD1	green	0.667452	7.64735e-05	0.871836	7.3727e-10
IL4R	green	-0.661311	9.38929e-05	-0.834771	1.80664e-08
FMO5	green	0.65959	9.9372e-05	0.82731	3.12955e-08
CCL15-CCL14	green	0.654294	0.000118049	0.825508	3.55977e-08
SORBS1	green	0.653645	0.000120542	0.866799	1.20274e-09
LGR5	green	0.652331	0.000125729	0.798582	2.08284e-07
ELN	green	0.651562	0.000128855	0.812917	8.42121e-08
ISM1	green	0.646593	0.000150772	0.780801	5.8234e-07
RNF180	green	0.644519	0.000160861	0.764542	1.37753e-06
MEOX2	green	0.644156	0.000162685	0.921089	1.42748e-12
ATP13A2	green	-0.643142	0.000167881	-0.81341	8.15171e-08
CIB1	green	-0.642754	0.00016991	-0.71065	1.56241e-05
RECK	green	0.639901	0.000185493	0.928273	4.10819e-13
FTO	green	0.639663	0.000186848	0.813359	8.17923e-08
SSSCA1	green	-0.639609	0.000187155	-0.784922	4.62806e-07
OASL	green	-0.636966	0.000202828	-0.528808	0.00318549
SLIT3	green	0.63689	0.000203297	0.940403	3.62271e-14
LINC01140	green	0.634793	0.000216578	0.710008	1.60301e-05
GXYLT2	green	0.633648	0.000224144	0.888556	1.23784e-10
ZNF704	green	0.629908	0.000250529	0.857389	2.85143e-09
TNS2	green	0.629742	0.000251755	0.852563	4.33668e-09
PBX1	green	0.62726	0.000270826	0.758144	1.89775e-06
FBLN1	green	0.624906	0.000290078	0.888147	1.29729e-10
MFAP4	green	0.623741	0.000300037	0.915551	3.44921e-12
MITF	green	0.619978	0.000334327	0.637624	0.000198823
LMO3	green	0.619516	0.000338766	0.723711	9.13304e-06
DEPTOR	green	0.618093	0.000352764	0.756944	2.01312e-06
MFSD4A	green	0.617472	0.000359026	0.800191	1.88839e-07
FZD4	green	0.616958	0.000364288	0.806476	1.27664e-07
STAC2	green	0.616933	0.000364555	0.707993	1.73664e-05
MMRN1	green	0.614749	0.000387688	0.59348	0.000689921
FBLIM1	green	-0.612635	0.000411297	-0.770001	1.03975e-06
TRIM2	green	0.611106	0.000429158	0.779252	6.34093e-07
TIMP2	green	0.609383	0.000450103	0.917485	2.55217e-12
CD24	green	-0.608873	0.000456465	-0.809789	1.0327e-07
FIBIN	green	0.607829	0.000469745	0.813046	8.34956e-08
C7	green	0.607567	0.000473139	0.764919	1.35137e-06
BNC2	green	0.605206	0.000504631	0.791581	3.15899e-07
MYD88	green	-0.603535	0.000528015	-0.721689	9.94397e-06
NOV	green	0.603413	0.000529762	0.755241	2.18773e-06
MIR99A	green	0.602566	0.000542012	0.69339	3.04392e-05
PPIF	green	-0.601062	0.000564377	-0.80664	1.26344e-07
LRRN4CL	green	0.600453	0.000573671	0.778816	6.4938e-07
MKL2	green	0.598008	0.0006123	0.632409	0.000232598
ARHGEF9	green	0.597694	0.00061742	0.867644	1.10946e-09
RAI2	green	0.596446	0.00063817	0.762006	1.5659e-06
PI16	green	0.595654	0.00065163	0.864986	1.42741e-09
AMOT	green	0.594587	0.000670181	0.785426	4.4984e-07
STMN2	green	0.593823	0.000683747	0.885897	1.67429e-10
SELENBP1	green	0.589741	0.000760369	0.721237	1.01339e-05
PREPL	green	0.589453	0.000766033	0.679359	5.06706e-05
GFRA1	green	0.589393	0.000767216	0.837227	1.49887e-08
NEGR1	green	0.589319	0.000768687	0.933977	1.38896e-13
FZD1	green	0.588945	0.000776134	0.817425	6.23384e-08
CDCP1	green	-0.587931	0.000796656	-0.82116	4.82845e-08
CLU	green	0.587037	0.000815153	0.818961	5.61622e-08
LRP6	green	0.586728	0.000821633	0.771852	9.43488e-07
CMIP	green	-0.586692	0.000822379	-0.808932	1.09136e-07
CCND2	green	-0.58614	0.00083407	-0.760162	1.71716e-06
ADCY2	green	0.585821	0.000840889	0.572036	0.00118633
DPT	green	0.585698	0.000843528	0.893618	6.81654e-11
ERO1A	green	-0.585131	0.000855824	-0.79112	3.24516e-07
ANGPTL1	green	0.583948	0.000881934	0.867422	1.1333e-09
TCF4	green	0.581781	0.000931603	0.78244	5.31811e-07
SLIT2	green	0.581344	0.0009419	0.837955	1.41737e-08
CFD	green	0.581095	0.000947811	0.873658	6.1458e-10
SFN	green	-0.580719	0.000956812	-0.77007	1.03601e-06
BTC	green	0.580471	0.000962796	0.582603	0.000912483
PDZRN3	green	0.577945	0.00102552	0.831565	2.29517e-08
RPL23AP32	green	0.577874	0.00102731	0.781327	5.65666e-07
PDGFRL	green	0.575089	0.00110068	0.774547	8.17738e-07
PLPP3	green	0.574136	0.00112683	0.87471	5.52556e-10
DNM3OS	green	0.573619	0.00114121	0.805114	1.39136e-07
HEPHL1	green	-0.571861	0.00119141	-0.788711	3.73048e-07
CLDN8	green	0.568373	0.00129667	0.81009	1.01275e-07
MIR99AHG	green	0.567075	0.00133785	0.715079	1.30664e-05
ZBTB16	green	0.566946	0.00134201	0.681182	4.74978e-05
VGLL3	green	0.566727	0.00134907	0.907035	1.19836e-11
GMPR	green	0.566723	0.00134921	0.649714	0.000136653
S100A12	green	-0.566107	0.00136932	-0.727346	7.8231e-06
JAM2	green	0.56587	0.0013771	0.882806	2.35686e-10
FOXO1	green	0.565371	0.00139365	0.824207	3.903e-08
OSR1	green	0.564318	0.00142913	0.826166	3.39677e-08
TACR1	green	0.562484	0.0014928	0.821747	4.63601e-08
LDLR	green	-0.562319	0.00149865	-0.727051	7.92273e-06
MRPL17	green	-0.560546	0.00156275	-0.782438	5.3186e-07
FGFR1	green	0.560283	0.00157246	0.845394	7.87268e-09
PRUNE2	green	0.560073	0.00158022	0.711605	1.50379e-05
KIAA1324	green	0.559591	0.00159824	0.817043	6.39663e-08
DAPK3	green	-0.557522	0.00167755	-0.750815	2.70732e-06
STK32A	green	0.556848	0.00170411	0.774323	8.27588e-07
ASPA	green	0.555627	0.00175317	0.733947	5.86914e-06
CA6	green	0.555122	0.00177381	0.816604	6.58883e-08
OAT	green	0.555032	0.0017775	0.517129	0.00407092
PTGFR	green	0.550811	0.00195878	0.872116	7.17104e-10
FBLN2	green	0.548648	0.00205768	0.88975	1.07814e-10
KANK2	green	0.547829	0.00209628	0.779754	6.16859e-07
DCN	green	0.547471	0.00211333	0.86584	1.31712e-09
CCDC80	green	0.545267	0.00222098	0.906929	1.2162e-11
OLFML1	green	0.544111	0.0022793	0.804636	1.43378e-07
C1orf115	green	0.544105	0.00227961	0.742427	4.00719e-06
GYS1	green	-0.543064	0.00233331	-0.717192	1.1984e-05
LIFR	green	0.541901	0.00239454	0.899375	3.33102e-11
S100A7A	green	-0.540921	0.00244722	-0.719334	1.09695e-05
VDAC2	green	-0.54059	0.00246523	-0.784136	4.83733e-07
FZD7	green	0.540228	0.00248506	0.783951	4.88768e-07
TCF12	green	0.537293	0.00265098	0.827674	3.04869e-08
KLHDC1	green	0.536872	0.00267558	0.738599	4.76897e-06
NTN4	green	0.536516	0.00269652	0.759897	1.74001e-06
CHRDL1	green	0.536118	0.00272007	0.916977	2.76417e-12
AGFG2	green	0.534278	0.00283133	0.722968	9.42365e-06
OGN	green	0.53304	0.00290835	0.898803	3.58344e-11
FBLN5	green	0.532645	0.0029333	0.955164	8.48651e-16
SSNA1	green	-0.532044	0.00297167	-0.751807	2.58209e-06
KRT6A	green	-0.531966	0.00297666	-0.758882	1.82984e-06
LINC00341	green	0.531758	0.00299004	0.854199	3.76856e-09
FREM1	green	0.531736	0.00299144	0.826683	3.27345e-08
PRICKLE1	green	0.531305	0.00301937	0.713966	1.3671e-05
ZNF521	green	0.529778	0.00312003	0.822693	4.34047e-08
ADAMTSL1	green	0.529517	0.00313758	0.715544	1.28209e-05
EPHA2	green	-0.529116	0.00316458	-0.796444	2.36939e-07
MXD3	green	-0.526996	0.00331095	-0.755094	2.20349e-06
CMYA5	green	0.526994	0.00331109	0.730646	6.78316e-06
SFRP1	green	0.526505	0.00334566	0.589103	0.000772979
ADGRD1	green	0.525175	0.00344124	0.656746	0.000109048
TIMM50	green	-0.524435	0.00349542	-0.617612	0.000357607
C2orf40	green	0.523376	0.00357422	0.74811	3.07738e-06
GSTM5	green	0.521271	0.00373543	0.665496	8.16801e-05
C2orf88	green	0.521139	0.00374576	0.720107	1.06226e-05
KRT16	green	-0.519048	0.00391239	-0.741997	4.08698e-06
ZNF577	green	0.519047	0.0039125	0.671564	6.64767e-05
EXOSC4	green	-0.518889	0.00392535	-0.734037	5.84591e-06
CGNL1	green	0.51815	0.0039859	0.769604	1.06147e-06
TMEM256-PLSCR3	green	-0.516415	0.00413128	-0.768347	1.13315e-06
DCLK1	green	0.516368	0.00413521	0.855187	3.459e-09
DMD	green	0.515186	0.0042369	0.792795	2.94218e-07
GALNT6	green	-0.514058	0.00433595	-0.689775	3.48021e-05
MGP	green	0.511842	0.00453619	0.923903	8.89221e-13
CPED1	green	0.511482	0.00456955	0.863599	1.62464e-09
PPARD	green	-0.508826	0.00482152	-0.704263	2.01065e-05
SORBS2	green	0.508603	0.00484316	0.847822	6.45499e-09
WDR91	green	-0.508263	0.00487641	-0.671511	6.65991e-05
OPHN1	green	0.507588	0.0049429	0.711022	1.53933e-05
EMCN	green	0.5054	0.00516399	0.83352	1.98477e-08
IGFBP5	green	0.505277	0.00517657	0.860385	2.18096e-09
DPP3	green	-0.502725	0.00544555	-0.736871	5.15395e-06
PNP	green	-0.502652	0.00545341	-0.630836	0.000243738
EEPD1	green	0.501709	0.00555585	0.631725	0.000237385
NEO1	green	0.501029	0.0056307	0.468201	0.0104228
ADGRA2	green	0.500492	0.00569052	0.83629	1.6102e-08
TBX15	green	0.500223	0.00572062	0.892815	7.50763e-11
NPY1R	green	0.500196	0.00572366	0.766725	1.23208e-06
FBXL7	green	0.499466	0.00580612	0.757161	1.9918e-06
PLPP1	green	0.499456	0.00580733	0.815606	7.04473e-08
C3	green	0.498562	0.00590967	0.837339	1.4861e-08
RHOJ	green	0.498334	0.00593611	0.758573	1.85799e-06
HNMT	green	0.498233	0.00594773	0.783502	5.01221e-07
ISLR	green	0.497587	0.00602319	0.796957	2.29755e-07
HOMER3	green	-0.496719	0.00612569	-0.796848	2.31261e-07
GPHN	green	0.496088	0.00620118	0.648235	0.000143189
UST	green	0.495242	0.00630354	0.801185	1.77662e-07
HEPH	green	0.494811	0.00635628	0.727929	7.62952e-06
GFRA3	green	0.492911	0.00659327	0.746662	3.29362e-06
ZNF667-AS1	green	0.491354	0.00679294	0.800262	1.88022e-07
MFAP5	green	0.487076	0.00736819	0.746216	3.36293e-06
CLDN10	green	0.486159	0.00749665	0.812094	8.88837e-08
SPRR2F	green	-0.486154	0.00749744	-0.64244	0.000171566
SRSF5	green	0.484364	0.00775378	0.683741	4.33431e-05
LOC730102	green	0.481511	0.00817765	0.750469	2.75229e-06
AQP1	green	0.480586	0.00831919	0.844822	8.24623e-09
PER3	green	0.480136	0.00838882	0.566444	0.00135827
MOB3A	green	-0.480076	0.00839809	-0.579349	0.000990217
EPS8	green	0.478574	0.00863434	0.870591	8.33685e-10
EDIL3	green	0.47819	0.0086956	0.639453	0.000188051
CASQ2	green	0.477368	0.00882784	0.707273	1.78679e-05
ELOF1	green	-0.475985	0.00905441	-0.677547	5.40102e-05
UNC13D	green	-0.474398	0.00932042	-0.55567	0.00175141
SETMAR	green	0.474285	0.00933957	0.68999	3.45279e-05
DDR2	green	0.474173	0.00935866	0.851172	4.88042e-09
TFCP2L1	green	0.474169	0.00935937	0.527449	0.00327917
NAGS	green	-0.473748	0.00943128	-0.581706	0.000933365
DCD	green	0.472321	0.00967833	0.708239	1.71985e-05
TTC3	green	0.47216	0.0097065	0.754341	2.28543e-06
CXCL12	green	0.471851	0.00976098	0.837971	1.4156e-08
KAT6B	green	0.47159	0.0098071	0.533081	0.00290577
RCAN2	green	0.47026	0.0100448	0.825597	3.53712e-08
LRRC26	green	0.469448	0.0101926	0.74522	3.52252e-06
NOVA1	green	0.469317	0.0102166	0.744474	3.6466e-06
KRT6C	green	-0.468956	0.0102829	-0.610356	0.000438164
FRZB	green	0.467886	0.0104815	0.821139	4.83557e-08
MXRA5	green	0.467133	0.0106232	0.571974	0.00118813
KLK12	green	-0.465175	0.0109994	-0.690331	3.40967e-05
SBNO2	green	-0.46352	0.0113259	-0.771443	9.64027e-07
ADAM8	green	-0.461913	0.0116508	-0.574049	0.00112924
CEP126	green	0.461363	0.0117638	0.851366	4.80124e-09
AXIN1	green	-0.459737	0.0121031	-0.811792	9.06633e-08
EIF6	green	-0.459016	0.0122561	-0.653213	0.000122224
BCHE	green	0.458979	0.0122641	0.519618	0.00386637
TMEM47	green	0.458793	0.0123038	0.887236	1.43939e-10
ZNF652	green	0.458308	0.012408	0.675504	5.80104e-05
PIP	green	0.458221	0.0124269	0.670919	6.79634e-05
HPSE2	green	0.457189	0.0126512	0.74705	3.23441e-06
SPARCL1	green	0.45606	0.0129007	0.898187	3.87496e-11
CYYR1	green	0.45449	0.0132543	0.442271	0.0162921
TMEM99	green	0.454209	0.0133184	0.587674	0.000801948
GLDN	green	0.453823	0.0134068	0.789342	3.59731e-07
SOX15	green	-0.453709	0.013433	-0.859486	2.3652e-09
DNER	green	0.453329	0.013521	0.665286	8.22566e-05
ETHE1	green	-0.451208	0.0140197	-0.581349	0.000941789
CTSF	green	0.449887	0.0143378	0.560805	0.00155324
MICALL1	green	-0.44969	0.0143858	-0.808797	1.10085e-07
KRT6B	green	-0.448142	0.0147673	-0.608862	0.000456606
GSTP1	green	-0.447289	0.0149813	-0.731879	6.42794e-06
MIR100HG	green	0.443188	0.0160458	0.790555	3.35352e-07
DPYSL2	green	0.4423	0.0162843	0.663185	8.82382e-05
RAMP2	green	0.442201	0.016311	0.72903	7.27601e-06
NMRAL1	green	-0.441167	0.0165928	-0.638159	0.000195617
MED31	green	-0.440769	0.0167024	-0.557955	0.00166068
MIR29C	green	0.440657	0.0167335	0.592396	0.000709727
UTRN	green	0.440221	0.0168544	0.765909	1.28472e-06
HEBP1	green	0.439749	0.016986	0.594338	0.000674585
EPGN	green	-0.439693	0.0170015	-0.676674	5.56879e-05
PMP22	green	0.439289	0.0171151	0.918423	2.19969e-12
OMD	green	0.437125	0.0177335	0.729083	7.25934e-06
ALPK2	green	0.435993	0.0180644	0.523709	0.00354926
MAMDC2	green	0.435968	0.0180719	0.725559	8.44423e-06
MTCH1	green	0.435636	0.0181697	0.48577	0.00755179
GPC3	green	0.434358	0.0185513	0.864222	1.53309e-09
CTSK	green	0.432825	0.0190175	0.825684	3.51528e-08
CCBE1	green	0.432594	0.0190885	0.698324	2.5274e-05
ZBTB20	green	0.432366	0.019159	0.751188	2.65962e-06
JUNB	green	-0.43229	0.0191825	-0.80477	1.42173e-07
AOX1	green	0.431814	0.0193301	0.78597	4.36214e-07
EPM2AIP1	green	0.431643	0.0193835	0.75701	2.00669e-06
ADD3	green	0.431631	0.0193873	0.749435	2.89079e-06
ZC3H6	green	0.430218	0.0198324	0.734022	5.84986e-06
SPRR3	green	-0.43015	0.019854	-0.553807	0.00182854
ZNF185	green	-0.429729	0.0199883	-0.742033	4.08014e-06
SMAD4	green	0.428855	0.0202699	0.520249	0.0038159
LRP1	green	0.427823	0.0206064	0.78723	4.06053e-07
CLDN10-AS1	green	0.427538	0.0207	0.774942	8.0065e-07
NCOA1	green	0.427477	0.0207203	0.76258	1.52136e-06
RFTN2	green	0.425715	0.0213078	0.700047	2.36639e-05
FHL5	green	0.425179	0.0214893	0.730493	6.82866e-06
HMOX2	green	-0.424635	0.0216746	-0.70727	1.78701e-05
HAS3	green	-0.423723	0.0219887	-0.701921	2.20186e-05
KRT16P2	green	-0.422109	0.0225532	-0.749539	2.87653e-06
CBX2	green	-0.417503	0.02423	-0.562919	0.00147749
JADE1	green	0.417067	0.0243939	0.68755	3.77579e-05
PID1	green	0.416268	0.0246966	0.691085	3.31605e-05
MPDZ	green	0.413851	0.025631	0.812393	8.71604e-08
VTCN1	green	0.413071	0.0259384	0.740865	4.30362e-06
LDHA	green	-0.412806	0.0260437	-0.665802	8.08435e-05
PITX1	green	-0.412548	0.0261462	-0.587082	0.000814205
PLSCR4	green	0.412333	0.0262321	0.628103	0.000264211
L3MBTL2	green	-0.41231	0.0262415	-0.455282	0.0130748
TTC28	green	0.412031	0.0263532	0.743731	3.77387e-06
RNF150	green	0.409675	0.0273128	0.616137	0.000372835
CHD6	green	0.409518	0.0273779	0.598614	0.000602517
IRX2	green	0.408465	0.0278165	0.437244	0.0176992
LHFP	green	0.406521	0.0286418	0.733103	6.09173e-06
C11orf54	green	0.405862	0.0289261	0.62786	0.000266105
CNKSR2	green	0.403323	0.0300427	0.773573	8.6131e-07
KCTD12	green	0.40321	0.0300928	0.878899	3.58248e-10
GLYATL2	green	0.403115	0.0301355	0.687917	3.72557e-05
MARC2	green	0.401189	0.0310075	0.811086	9.49319e-08
MAP7D1	green	-0.399051	0.0319997	-0.612611	0.000411575
SFRP2	green	0.398883	0.0320785	0.78741	4.01912e-07
CSTB	green	-0.398857	0.032091	-0.688757	3.61281e-05
PGM5	green	0.398512	0.0322537	0.432116	0.0192364
ORMDL2	green	-0.398492	0.0322629	-0.640998	0.000179359
SGK223	green	-0.398157	0.0324219	-0.479599	0.00847253
CFH	green	0.395306	0.0337989	0.829433	2.68379e-08
SOBP	green	0.395092	0.0339041	0.747754	3.12938e-06
MIF	green	-0.394953	0.0339723	-0.752453	2.50338e-06
NOSTRIN	green	0.394324	0.0342838	0.72118	1.0158e-05
FERMT2	green	0.394261	0.0343151	0.635015	0.000215135
CENPC	green	0.394068	0.034411	0.611013	0.000430268
ARRDC1	green	-0.393529	0.0346808	-0.727178	7.87992e-06
HK2	green	-0.39324	0.0348258	-0.627089	0.000272181
SSC5D	green	0.392223	0.0353406	0.586182	0.000833188
ESM1	green	-0.390311	0.0363244	-0.434519	0.0185029
CD99	green	0.389213	0.0368993	0.588403	0.000787062
PQLC2	green	-0.387822	0.0376386	-0.630194	0.000248413
HIBADH	green	0.387692	0.037708	0.67496	5.91181e-05
NCAM2	green	0.38733	0.0379029	0.604505	0.000514323
ADRA2A	green	0.387218	0.0379631	0.649571	0.000137271
CES1	green	0.386657	0.0382666	0.574971	0.00110389
PLN	green	0.385338	0.0389878	0.73935	4.61005e-06
KMT5B	green	0.385322	0.0389965	0.596559	0.000636254
RHOBTB3	green	0.383398	0.0400678	0.697026	2.65502e-05
CP	green	0.382991	0.0402978	0.78486	4.64427e-07
RNF38	green	0.382345	0.0406643	0.644747	0.000159724
TLDC1	green	-0.381752	0.0410031	-0.731849	6.43619e-06
CNTN3	green	0.38077	0.0415693	0.692833	3.1078e-05
OXGR1	green	0.380693	0.0416143	0.610774	0.00043313
MAP1A	green	0.378406	0.0429582	0.75648	2.05943e-06
DST	green	0.375891	0.0444761	0.41657	0.0245819
PUSL1	green	-0.374195	0.0455235	-0.637879	0.000197288
PDGFD	green	0.373917	0.0456972	0.731763	6.46052e-06
PROM1	green	0.372226	0.0467642	0.660305	9.70623e-05
R3HDM4	green	-0.370521	0.0478593	-0.679108	5.11225e-05
LCN2	green	-0.368787	0.0489951	-0.541013	0.00244219
FGF2	green	0.366885	0.0502639	0.844626	8.37712e-09
TMEM150C	green	0.365908	0.0509263	0.751735	2.59099e-06
RHOD	green	-0.365494	0.0512088	-0.658311	0.000103622
ZNF593	green	-0.36503	0.0515271	-0.784675	4.69301e-07
DPYSL3	green	0.364386	0.0519716	0.738184	4.85898e-06
LBP	green	-0.362889	0.0530155	-0.303347	0.109672
BCL2	green	0.361622	0.0539124	0.706613	1.83385e-05
EBF1	green	0.359469	0.0554638	0.793683	2.79227e-07
ACSS3	green	0.35853	0.0561512	0.759606	1.7653e-06
RALB	green	-0.352415	0.0607934	-0.603888	0.000523007
DLX2	green	-0.351622	0.0614168	-0.40863	0.0277476
GRB14	green	0.349952	0.0627458	0.679423	5.0556e-05
OSR2	green	0.348536	0.0638897	0.58696	0.00081676
ENTPD3	green	-0.34533	0.0665409	-0.292604	0.123476
EEF2	green	0.344508	0.0672334	0.514253	0.00431871
OLFML3	green	0.344477	0.0672603	0.659836	9.85717e-05
LOX	green	0.34319	0.0683571	0.532052	0.00297113
ROR1	green	0.34219	0.069219	0.681446	4.70525e-05
RBPMS	green	0.341053	0.0702085	0.599872	0.000582653
TMEM63A	green	0.337044	0.073788	0.535009	0.00278669
MIR4451	green	0.336185	0.0745727	0.526406	0.00335265
NBEA	green	0.336102	0.0746486	0.811109	9.47944e-08
MIR3165	green	-0.333333	0.0772239	-0.55303	0.0018616
AARD	green	0.333032	0.0775077	0.61906	0.000343192
APIP	green	0.332559	0.0779565	0.563188	0.00146806
ADIPOR1	green	-0.33152	0.0789469	-0.625028	0.00028905
EFEMP1	green	0.330556	0.0798747	0.618032	0.000353371
VLDLR	green	-0.330517	0.0799132	-0.65466	0.000116667
GSDMC	green	-0.330495	0.0799346	-0.758886	1.8295e-06
LRRC15	green	0.329047	0.0813444	0.745326	3.50525e-06
SSH3	green	-0.328459	0.0819231	-0.768181	1.14291e-06
KRT17	green	-0.326362	0.0840104	-0.537711	0.00262682
IMPDH1	green	-0.326244	0.0841286	-0.635174	0.00021411
LPAR1	green	0.325879	0.0844965	0.761366	1.61699e-06
BCAP31	green	-0.325656	0.084722	-0.481088	0.00824217
PLD2	green	-0.324559	0.085838	-0.648845	0.000140462
SEPT11	green	0.322069	0.0884105	0.711136	1.53233e-05
SCIN	green	0.321315	0.0892009	0.428505	0.0203835
CCL3	green	-0.320671	0.0898808	-0.452894	0.0136218
CREB3L1	green	0.318709	0.091975	0.404047	0.0297204
GALNT18	green	-0.318186	0.092539	-0.632569	0.000231489
NGF	green	-0.318177	0.092549	-0.482667	0.00800364
PAM	green	0.315628	0.0953381	0.48082	0.00828318
PRG4	green	0.314813	0.0962424	0.645999	0.000153604
FGD5-AS1	green	0.314252	0.0968696	0.600871	0.000567282
TMEM119	green	0.314179	0.0969519	0.683831	4.32031e-05
C1orf43	green	-0.313627	0.0975712	-0.309464	0.102344
TSPAN7	green	0.312504	0.0988423	0.740511	4.3736e-06
ACOT2	green	0.311366	0.100142	0.429316	0.0201211
MEG3	green	0.310585	0.101041	0.510048	0.00470416
VIM	green	0.310534	0.101101	0.740218	4.43212e-06
PGBD5	green	-0.310465	0.10118	-0.696885	2.66919e-05
CLIC6	green	0.310147	0.101549	0.744244	3.68556e-06
LOC100506548	green	0.309572	0.102219	0.5039	0.00532023
SDC2	green	0.309159	0.1027	0.612216	0.000416132
MYLIP	green	0.306803	0.105485	0.537735	0.0026254
GPR68	green	-0.306216	0.106187	-0.632584	0.00023139
EPHA3	green	0.304831	0.107859	0.570345	0.00123621
GAS1	green	0.30471	0.108006	0.486748	0.00741391
TRHDE	green	0.304279	0.108531	0.4241	0.0218583
SIRT7	green	-0.304145	0.108695	-0.30163	0.111797
SMAD9	green	0.302325	0.110932	0.395146	0.0338776
CRHBP	green	0.302176	0.111118	0.565306	0.00139583
LDLRAP1	green	-0.301943	0.111408	-0.733551	5.97263e-06
PCDH18	green	0.301051	0.11252	0.634713	0.000217101
FSTL1	green	0.299551	0.114411	0.712222	1.46691e-05
WDR74	green	-0.299286	0.114748	-0.395562	0.0336732
PNRC1	green	0.298291	0.116018	0.475377	0.00915564
COLEC12	green	0.298194	0.116142	0.70212	2.185e-05
MAOB	green	0.29504	0.12024	0.646087	0.00015318
UVRAG	green	0.294316	0.121195	0.629018	0.00025719
FRMD8	green	-0.294017	0.121591	-0.621407	0.000320917
CEACAM5	green	-0.293824	0.121847	-0.452732	0.0136597
MYCT1	green	0.291048	0.125577	0.539798	0.00250881
TXNIP	green	0.288989	0.128397	0.43938	0.0170896
KRT75	green	-0.286388	0.132027	-0.422791	0.0223132
MINK1	green	-0.284111	0.135264	-0.706973	1.808e-05
MELTF	green	0.283839	0.135654	0.44337	0.0159972
FGF7	green	0.283044	0.136801	0.781907	5.47802e-07
ENPP3	green	0.281916	0.13844	0.561722	0.00151997
FIGN	green	0.278704	0.143183	0.549424	0.00202172
CDK5	green	-0.278205	0.143931	-0.494696	0.0063704
RBBP7	green	0.273746	0.150736	0.528828	0.00318416
TRIB3	green	-0.273032	0.151846	-0.460329	0.0119786
BICC1	green	0.272441	0.15277	0.738049	4.88868e-06
PLIN3	green	-0.271844	0.153708	-0.549546	0.00201613
RGS5	green	0.270979	0.155073	0.631292	0.00024046
MMP27	green	0.270792	0.155368	0.563123	0.00147033
MRPL49	green	-0.269158	0.157975	-0.408586	0.0277659
TMEM55A	green	0.261233	0.171058	0.647591	0.000146125
EDA2R	green	0.258879	0.175089	0.469753	0.0101368
SEZ6	green	-0.258838	0.17516	-0.418063	0.0240211
MAP2K3	green	-0.253821	0.183971	-0.386947	0.0381093
LINC01278	green	0.25179	0.187627	0.496442	0.00615873
ZEB2	green	0.251582	0.188004	0.719396	1.09412e-05
TSHZ2	green	0.249354	0.192075	0.649176	0.000139
NKAPP1	green	0.241914	0.206115	0.480865	0.00827627
PARM1	green	0.241732	0.206467	0.581169	0.000946068
LPL	green	0.237059	0.215646	0.632346	0.000233039
KIAA1324L	green	0.235905	0.217956	0.654201	0.000118405
REEP4	green	-0.235723	0.21832	-0.638669	0.000192607
AQP7	green	0.235431	0.218909	0.419178	0.0236089
CTGF	green	0.23457	0.220646	0.642932	0.000168978
A2M	green	0.233767	0.222276	0.703984	2.03264e-05
DDA1	green	-0.228927	0.232273	-0.562768	0.00148279
FAT4	green	0.228898	0.232334	0.694772	2.89046e-05
RNF152	green	0.228762	0.23262	0.290215	0.126713
CADM2	green	0.224755	0.241127	0.515748	0.00418835
MIR4504	green	0.223307	0.244252	0.454861	0.01317
LPAR5	green	-0.221969	0.247164	-0.563287	0.00146461
NOSIP	green	-0.221069	0.249133	-0.454437	0.0132664
SMIM10L2A	green	0.217181	0.257768	0.440705	0.0167201
QSOX1	green	-0.216908	0.258381	-0.539657	0.00251662
PRRX1	green	0.214246	0.264413	0.616912	0.00036477
TM4SF18	green	0.214105	0.264735	0.434705	0.018447
TMEM204	green	0.213975	0.265032	0.45828	0.0124141
ZNF808	green	0.213659	0.265755	0.409427	0.0274155
GALNT11	green	0.213121	0.266989	0.651858	0.000127644
VEGFA	green	-0.211428	0.270897	-0.448254	0.0147395
CRIM1	green	0.210738	0.272501	0.387628	0.0377426
SHB	green	-0.209744	0.274821	-0.550638	0.00196651
DGAT1	green	-0.208961	0.276658	-0.591325	0.000729782
FBN1	green	0.206886	0.281565	0.708076	1.73093e-05
BNIP3	green	-0.206493	0.282499	-0.624043	0.000297429
TFPI	green	0.203805	0.28895	0.571856	0.00119155
CD200	green	0.200024	0.298182	0.604582	0.000513259
NDFIP1	green	0.19572	0.308913	0.696563	2.70196e-05
DOK6	green	0.192897	0.31608	0.436125	0.0180256
EID1	green	0.189287	0.325396	0.606895	0.000481922
TRPS1	green	0.187144	0.331003	0.583395	0.000894392
HAS2	green	0.186814	0.331873	0.383649	0.0399271
TPM2	green	0.186227	0.33342	0.248582	0.193501
APLNR	green	0.178263	0.354868	0.397401	0.0327825
SOX2	green	-0.176685	0.359212	-0.470071	0.0100791
TIMM13	green	-0.173752	0.367372	-0.4936	0.00650648
ACSL3	green	0.17338	0.368414	0.456943	0.0127052
SCG3	green	0.168484	0.382295	0.499432	0.00581001
MBOAT7	green	-0.166433	0.388201	-0.630151	0.000248729
TP63	green	-0.166136	0.389061	-0.62072	0.000327304
TMEM14B	green	0.165562	0.390723	0.486306	0.00747596
RHOU	green	0.158254	0.412262	0.457957	0.0124839
TIPARP	green	-0.157742	0.413793	-0.432626	0.0190787
ACVRL1	green	0.157088	0.415756	0.559516	0.00160107
TSTA3	green	-0.144251	0.455328	-0.616258	0.000371567
TRAPPC5	green	-0.138645	0.473213	-0.554591	0.00179575
ARL6IP5	green	0.134566	0.486454	0.695085	2.85666e-05
PLP2	green	-0.133015	0.491537	-0.629781	0.000251469
PODXL	green	0.130684	0.499227	0.361589	0.053936
GYPC	green	0.12683	0.512075	0.538991	0.00255384
MIR340	green	-0.12365	0.522795	0.342243	0.0691732
EDN2	green	-0.121736	0.529298	-0.335039	0.0756293
HSBP1L1	green	-0.118517	0.540324	-0.386672	0.0382584
MBD1	green	-0.115551	0.550578	-0.455162	0.0131018
SESTD1	green	0.115522	0.550678	0.629679	0.000252226
TNRC6C	green	0.111419	0.565011	0.663805	8.64339e-05
GRB7	green	-0.109259	0.572626	-0.465179	0.0109986
ANPEP	green	0.10777	0.577901	0.483455	0.00788673
HMGN3	green	0.107256	0.579724	0.428534	0.0203739
PLXND1	green	0.105886	0.584604	0.408693	0.0277211
CA2	green	-0.104933	0.588007	-0.518348	0.00396958
KDR	green	0.104292	0.590302	0.288394	0.129221
ADSSL1	green	-0.100694	0.603256	-0.322242	0.0882303
NAPRT	green	-0.08934	0.644891	-0.488311	0.00719809
TRIM48	green	0.08833	0.648649	0.370547	0.0478428
C16orf86	green	-0.0879849	0.649934	-0.395559	0.0336747
TMEM63B	green	-0.0863575	0.656011	-0.461231	0.0117911
MIR4540	green	-0.0829213	0.668913	-0.30498	0.107678
LIX1L	green	0.0820998	0.672011	0.486716	0.00741848
PECAM1	green	0.0799261	0.680235	0.591003	0.000735903
IGF1	green	0.0674418	0.728136	0.557456	0.00168013
KLC3	green	0.0614113	0.751652	-0.351542	0.0614799
SEC14L1P1	green	0.0611786	0.752564	0.523826	0.00354053
RGPD2	green	-0.0589784	0.761202	0.355913	0.058103
ECSCR	green	0.0565316	0.770842	0.461488	0.011738
CCDC87	green	-0.0554267	0.775206	-0.263376	0.167448
CRACR2A	green	-0.0453006	0.815497	0.490267	0.00693536
PAK3	green	0.043449	0.822918	0.334463	0.076165
IGFBP4	green	-0.0407967	0.833574	0.508566	0.00484676
MARK2	green	0.0390041	0.840792	-0.4951	0.00632091
ENG	green	-0.0294709	0.879378	0.311148	0.100392
TMEM183B	green	0.0282435	0.884368	-0.391244	0.0358418
APRT	green	-0.0209457	0.914118	-0.429407	0.0200918
MIR205	green	0.0189385	0.922322	-0.464431	0.0111453
NRP1	green	-0.0063889	0.973761	0.545446	0.00221204
CHMP1A	green	0.00231326	0.990498	-0.359911	0.0551428
MAB21L1	green	-0.00194961	0.991992	0.483052	0.00794642

## Sheet: Supplementary Table 7
Supplementary Table 7. Overrepresented GO terms in the module 5 relevant for cSCC in the GSE45216-98774 dataset
ID	Description	GeneRatio	BgRatio	pvalue	p.adjust	qvalue	gene	Count
GO:0004364	glutathione transferase activity	12/1366	27/17697	2.48498e-07	0.000243776	0.000232018	MGST2/LANCL1/GSTA3/GSTO2/GSTA4/GSTM2/GSTM3/GSTM1/HPGDS/GSTM4/GSTO1/GSTT2	12
GO:1900750	oligopeptide binding	7/1366	12/17697	9.00852e-06	0.00299005	0.00284583	LANCL1/GSTM2/GSTM3/GSS/GSTM1/GSTM4/FOLH1	7
GO:0005518	collagen binding	17/1366	67/17697	9.14389e-06	0.00299005	0.00284583	CTSB/ITGA3/PPIB/ADAM9/MMP13/CTSL/MMP9/SERPINH1/LUM/NID2/COCH/THBS1/NID1/ASPN/ITGA1/SMAD7/PAK1	17
GO:0005201	extracellular matrix structural constituent	29/1366	163/17697	1.87007e-05	0.00458635	0.00436514	PXDN/COL4A2/MFAP2/TNC/LAMB3/FBN2/LTBP1/LAMA3/COL10A1/COL11A1/COL4A1/NPNT/SRPX2/LUM/NID2/LAMA5/THBS1/COL27A1/COL8A1/NID1/ASPN/COL22A1/COL12A1/CTHRC1/COL8A2/SRPX/COL4A6/LTBP2/LAMB1	29
GO:0005125	cytokine activity	35/1366	220/17697	3.31411e-05	0.00650229	0.00618867	CXCL1/CXCL8/INHBA/VEGFA/NRG1/IL1B/TNFSF10/AREG/TSLP/IL1A/IL24/CMTM3/CXCL6/CCL20/WNT7A/CXCL3/IFNE/GREM1/TGFB2/TNFRSF11B/TGFB3/TIMP1/CXCL2/IL20/NAMPT/IL6/CCL4/SCG2/CXCL5/CXCL13/GDF10/TNFSF13/PPBP/C17orf99/IFNK	35
GO:0043295	glutathione binding	6/1366	11/17697	6.88597e-05	0.0112586	0.0107155	LANCL1/GSTM2/GSTM3/GSS/GSTM1/GSTM4	6
GO:0016765	transferase activity, transferring alkyl or aryl (other than methyl) groups	14/1366	58/17697	0.000100229	0.0140464	0.0133689	MGST2/LANCL1/GSTA3/GSTO2/GSTA4/GSTM2/GSTM3/GSTM1/HPGDS/GSTM4/AGPS/TRMT12/GSTO1/GSTT2	14
GO:0005126	cytokine receptor binding	40/1366	286/17697	0.000180118	0.0220869	0.0210216	ACVR2A/CXCL1/SHC1/CXCL8/INHBA/GATA3/VEGFA/VEGFC/PXDN/IL1B/TNFSF10/IL1RAP/TSLP/IL1A/CXCL6/CCL20/BID/CXCL3/IFNE/IL6R/GREM1/TGFB2/TGFB3/CXCL2/IL20/IL6/CCL4/TRIM37/CXCL5/SMAD7/CXCL13/FADD/TGFBR1/SH2B3/GDF10/TNFSF13/PPBP/TLR5/IFNK/SPRED2	40
GO:0086080	protein binding involved in heterotypic cell-cell adhesion	6/1366	13/17697	0.000223423	0.0225344	0.0214475	GLDN/DSP/SIRPA/PKP2/CXADR/NRCAM	6
GO:0043236	laminin binding	9/1366	29/17697	0.000229709	0.0225344	0.0214475	ITGA3/ADAM9/LGALS3/BCAM/LGALS1/ITGA6/THBS1/NID1/PLEKHA2	9
GO:0043621	protein self-association	13/1366	56/17697	0.000267449	0.0238516	0.0227011	ACVR2A/VAMP2/ABCD3/AGA/S100A7A/RNF112/CTSC/SVIP/CCDC88C/TP53/TNFAIP3/PCSK9/TRIM32	13
GO:0019838	growth factor binding	23/1366	137/17697	0.00031959	0.0261265	0.0248664	ACVR2A/SHC1/NRP2/PXDN/OSMR/LTBP1/COL4A1/ITGA6/ERBB3/PDGFRB/SRPX2/BMPR1B/IL6R/TGFB3/THBS1/ESM1/FLT1/CXCL13/TGFBR1/KLB/IGFBP6/ACVR1/LTBP2	23
GO:0048018	receptor ligand activity	58/1366	482/17697	0.000483316	0.0364717	0.0347126	PTHLH/CXCL1/CXCL8/TYMP/INHBA/JAG1/VEGFA/NRG1/TGFA/VEGFC/NRG2/IL1B/TNFSF10/AREG/LGALS3/STC1/TSLP/IL1A/IL24/CMTM3/CXCL6/CCL20/FLRT3/STC2/FGF11/WNT7A/CXCL3/IFNE/SST/IL6R/GREM1/UCN2/TGFB2/PDGFC/TNFRSF11B/TGFB3/TIMP1/CXCL2/IL20/NAMPT/IL6/WNT10B/CCL4/SCG2/RLN2/SEMA4C/EDN3/GRP/NPFF/CXCL5/CXCL13/SEMA6A/GDF10/TNFSF13/PPBP/C17orf99/IFNK/SEMA3C	58
GO:0070851	growth factor receptor binding	22/1366	134/17697	0.000585378	0.0410183	0.0390399	SHC1/VAV2/GATA3/VEGFA/TGFA/VEGFC/IL1B/IL1RAP/AREG/TSLP/IL1A/FER/FLRT3/PDGFRB/IL6R/GREM1/PDGFC/ESM1/ARF4/IL6/KLB/TLR5	22

## Sheet: Supplementary Table 8
Supplementary Table 8. KEGG functional enrichment of genes in the module 5 relevant for cSCC in the GSE45216-98774 dataset
ID	Description	GeneRatio	BgRatio	pvalue	p.adjust	qvalue	gene	Count
hsa05323	Rheumatoid arthritis	22/644	93/8039	2.79461e-06	0.000875258	0.000740558	CXCL1/MMP1/CXCL8/MMP3/VEGFA/IL1B/CTSL/IL1A/CXCL6/CCL20/CXCL3/TGFB2/TGFB3/CXCL2/IL6/TCIRG1/TLR2/CXCL5/FLT1/ATP6V0E2/HLA-DQA1/TNFSF13	22
hsa04668	TNF signaling pathway	24/644	112/8039	6.38629e-06	0.000875258	0.000740558	CXCL1/SOCS3/MMP3/JAG1/PIK3CD/VEGFC/IL1B/PTGS2/CREB3L2/MMP9/MAP3K8/AKT1/CXCL6/CCL20/PIK3CB/CXCL3/MAP3K5/CXCL2/CREB3L4/IL6/MLKL/CXCL5/TNFAIP3/FADD	24
hsa05418	Fluid shear stress and atherosclerosis	27/644	139/8039	1.19595e-05	0.000875258	0.000740558	ACVR2A/MGST2/VEGFA/SUMO3/PIK3CD/GSTA3/IL1B/GSTO2/GSTA4/CTSL/RAC2/IL1A/MMP9/GSTM2/GSTM3/AKT1/ASS1/PIK3CB/GSTM1/GSTM4/PLAT/BMPR1B/MAP3K5/GSTO1/TP53/ACVR1/GSTT2	27
hsa01524	Platinum drug resistance	18/644	73/8039	1.21089e-05	0.000875258	0.000740558	MGST2/PIK3CD/GSTA3/MSH3/GSTO2/GSTA4/GSTM2/GSTM3/AKT1/BID/PIK3CB/GSTM1/GSTM4/MAP3K5/GSTO1/TP53/FADD/GSTT2	18
hsa05146	Amoebiasis	22/644	102/8039	1.3849e-05	0.000875258	0.000740558	CXCL1/CXCL8/ACTN1/PIK3CD/CD1A/COL4A2/IL1B/LAMB3/LAMA3/COL4A1/PIK3CB/CXCL3/ITGAM/TGFB2/LAMA5/TGFB3/CXCL2/IL6/TLR2/C9/COL4A6/LAMB1	22
hsa00480	Glutathione metabolism	14/644	57/8039	0.000117149	0.00616983	0.00522031	MGST2/GSTA3/GSTO2/GSTA4/ODC1/GSTM2/GSTM3/GSS/GSTM1/HPGDS/GSTM4/GSTO1/GPX7/GSTT2	14
hsa04060	Cytokine-cytokine receptor interaction	42/644	294/8039	0.000148503	0.00670383	0.00567213	TNFRSF19/ACVR2A/CXCL1/CXCL8/INHBA/IL4R/OSMR/IL1B/TNFSF10/IL1RAP/IL13RA1/TSLP/IL1A/TNFRSF10B/IL24/IL12RB2/TNFRSF10D/CXCL6/IL1RL1/CCL20/CXCL17/CXCL3/BMPR1B/IFNE/IL6R/TGFB2/TNFRSF11B/TGFB3/ACKR3/CXCL2/IL20/IL6/CCL4/IL15RA/CXCL5/CXCL13/TGFBR1/GDF10/TNFSF13/PPBP/ACVR1/IFNK	42
hsa04151	PI3K-Akt signaling pathway	47/644	354/8039	0.000352146	0.0123696	0.010466	KIT/IL4R/ITGA3/VEGFA/TGFA/PIK3CD/VEGFC/PPP2CA/COL4A2/OSMR/TNC/AREG/YWHAH/LAMB3/CREB3L2/MAGI1/LAMA3/TSC1/GNB5/AKT1/FOXO3/COL4A1/ITGA6/PIK3CB/PPP2R3A/ERBB3/PDGFRB/ANGPT2/IL6R/LAMA5/PDGFC/THBS1/CREB3L4/DDIT4/IL6/TP53/ITGA1/EFNA4/CDK6/TLR2/FLT1/GNGT1/MYB/NRAS/COL4A6/PPP2R2A/LAMB1	47
hsa05225	Hepatocellular carcinoma	27/644	168/8039	0.0003523	0.0123696	0.010466	SHC1/MGST2/TGFA/PIK3CD/GSTA3/AXIN2/GSTO2/GSTA4/SMARCD2/GSTM2/GSTM3/AKT1/PIK3CB/GSTM1/WNT7A/GSTM4/TGFB2/TGFB3/GSTO1/WNT10B/TP53/FRAT2/CDK6/TGFBR1/NRAS/GADD45A/GSTT2	27
hsa05210	Colorectal cancer	17/644	86/8039	0.000392887	0.0124152	0.0105045	TGFA/RALB/RALA/PIK3CD/AXIN2/MSH3/AREG/APPL1/RAC2/AKT1/PIK3CB/TGFB2/TGFB3/TP53/TGFBR1/NRAS/GADD45A	17
hsa00982	Drug metabolism - cytochrome P450	15/644	72/8039	0.000474999	0.0136454	0.0115454	MGST2/ALDH1A3/GSTA3/GSTO2/GSTA4/FMO5/GSTM2/GSTM3/GSTM1/HPGDS/GSTM4/GSTO1/MAOA/CYP2E1/GSTT2	15
hsa04926	Relaxin signaling pathway	22/644	129/8039	0.000531506	0.0139963	0.0118423	EDNRB/MMP1/SHC1/VEGFA/PIK3CD/VEGFC/COL4A2/MMP13/CREB3L2/ARRB2/GNAI1/MMP9/GNB5/AKT1/COL4A1/PIK3CB/CREB3L4/RLN2/GNGT1/TGFBR1/NRAS/COL4A6	22
hsa05202	Transcriptional misregulation in cancer	28/644	186/8039	0.000812373	0.016835	0.0142442	CXCL8/PLAU/MMP3/PML/ERG/HDAC1/MITF/MMP9/RUNX2/ETV7/PLAT/ITGAM/NUPR1/PBX1/CDK14/IL6/TP53/DUSP6/SS18/ID2/BCL11B/GRIA3/FLT1/DDIT3/CCNA1/NFKBIZ/GADD45A/KDM6A	28
hsa05220	Chronic myeloid leukemia	15/644	76/8039	0.000865202	0.016835	0.0142442	SHC1/PIK3CD/HDAC1/AKT1/ABL1/PIK3CB/TGFB2/TGFB3/TP53/MECOM/CDK6/TGFBR1/NRAS/CTBP2/GADD45A	15
hsa04061	Viral protein interaction with cytokine and cytokine receptor	18/644	100/8039	0.000871129	0.016835	0.0142442	CXCL1/CXCL8/TNFSF10/TNFRSF10B/IL24/TNFRSF10D/CXCL6/CCL20/CXCL3/IL6R/ACKR3/CXCL2/IL20/IL6/CCL4/CXCL5/CXCL13/PPBP	18
hsa04933	AGE-RAGE signaling pathway in diabetic complications	18/644	100/8039	0.000871129	0.016835	0.0142442	SERPINE1/CXCL8/VEGFA/PIK3CD/VEGFC/COL4A2/IL1B/IL1A/NOX4/AKT1/COL4A1/PIK3CB/TGFB2/TGFB3/IL6/TGFBR1/NRAS/COL4A6	18
hsa05165	Human papillomavirus infection	43/644	330/8039	0.000921634	0.016835	0.0142442	PKM/ITGA3/JAG1/VEGFA/PIK3CD/PPP2CA/AXIN2/HDAC1/COL4A2/HEYL/TNC/LAMB3/PTGS2/CREB3L2/MAGI1/LAMA3/TSC1/AKT1/COL4A1/ITGA6/PARD3/PIK3CB/WNT7A/PPP2R3A/PDGFRB/LAMA5/LFNG/THBS1/CREB3L4/WNT10B/HEY2/TP53/TCIRG1/ITGA1/CDK6/ATP6V0E2/FADD/CCNA1/NRAS/COL4A6/NOTCH1/PPP2R2A/LAMB1	43
hsa05211	Renal cell carcinoma	14/644	69/8039	0.000958958	0.016835	0.0142442	HIF1A/VEGFA/TGFA/PIK3CD/AKT1/EPAS1/PIK3CB/RAPGEF1/TGFB2/TGFB3/ETS1/EGLN3/PAK1/NRAS	14
hsa04010	MAPK signaling pathway	39/644	294/8039	0.00112345	0.0179645	0.0151998	KIT/CACNB4/VEGFA/TGFA/RPS6KA6/VEGFC/MAPKAPK5/IL1B/FLNB/IL1RAP/CACNA2D2/AREG/RAC2/ARRB2/GNA12/IL1A/RRAS2/MAP3K8/AKT1/MAP3K4/ERBB3/PDGFRB/ANGPT2/MAP3K5/TGFB2/PDGFC/CACNA2D1/TGFB3/MAP4K4/TP53/DUSP6/MECOM/EFNA4/FLT1/DDIT3/TGFBR1/PAK1/NRAS/GADD45A	39
hsa04657	IL-17 signaling pathway	17/644	94/8039	0.00113699	0.0179645	0.0151998	CXCL1/MMP1/CXCL8/MMP3/IL1B/S100A7A/PTGS2/MMP13/MMP9/CXCL6/CCL20/CXCL3/CXCL2/IL6/CXCL5/TNFAIP3/FADD	17
hsa01521	EGFR tyrosine kinase inhibitor resistance	15/644	79/8039	0.00131187	0.0197404	0.0167024	SHC1/VEGFA/NRG1/TGFA/PIK3CD/NRG2/AKT1/FOXO3/PIK3CB/ERBB3/PDGFRB/IL6R/PDGFC/IL6/NRAS	15
hsa04014	Ras signaling pathway	32/644	232/8039	0.00161891	0.0232534	0.0196748	SHC1/KIT/ETS2/VEGFA/TGFA/RALB/RALA/PIK3CD/VEGFC/ABL2/RAC2/RRAS2/GNB5/HTR7/AKT1/RGL1/RASSF1/ABL1/PIK3CB/PDGFRB/ANGPT2/PDGFC/FOXO4/RASAL2/EFNA4/ETS1/FLT1/GNGT1/RGL2/PAK1/NRAS/RIN1	32
hsa04510	Focal adhesion	28/644	199/8039	0.00230593	0.0315372	0.0266837	SHC1/ACTN1/VAV2/ITGA3/VEGFA/PIK3CD/VEGFC/CAPN2/COL4A2/FLNB/TNC/LAMB3/RAC2/LAMA3/AKT1/COL4A1/ITGA6/PIK3CB/RAPGEF1/PDGFRB/LAMA5/PDGFC/THBS1/ITGA1/FLT1/PAK1/COL4A6/LAMB1	28
hsa05222	Small cell lung cancer	16/644	92/8039	0.00239523	0.0315372	0.0266837	ITGA3/PIK3CD/COL4A2/LAMB3/PTGS2/LAMA3/AKT1/COL4A1/ITGA6/PIK3CB/LAMA5/TP53/CDK6/COL4A6/GADD45A/LAMB1	16
hsa05212	Pancreatic cancer	14/644	76/8039	0.002531	0.0319918	0.0270684	VEGFA/TGFA/RALB/RALA/PIK3CD/RAC2/AKT1/PIK3CB/TGFB2/TGFB3/TP53/CDK6/TGFBR1/GADD45A	14
hsa04071	Sphingolipid signaling pathway	19/644	119/8039	0.00274409	0.0333513	0.0282186	DEGS1/FCER1A/PIK3CD/PPP2CA/RAC2/ASAH1/GNAI1/GNA12/AKT1/BID/PIK3CB/PPP2R3A/MAP3K5/TP53/SGMS2/ABCC1/NRAS/MS4A2/PPP2R2A	19
hsa00980	Metabolism of xenobiotics by cytochrome P450	14/644	77/8039	0.00287189	0.0336117	0.028439	MGST2/ALDH1A3/GSTA3/GSTO2/GSTA4/GSTM2/GSTM3/GSTM1/HPGDS/GSTM4/CYP2S1/GSTO1/CYP2E1/GSTT2	14
hsa04350	TGF-beta signaling pathway	16/644	94/8039	0.00300167	0.033876	0.0286625	ID4/ACVR2A/INHBA/PPP2CA/LTBP1/FST/TGIF2/BMPR1B/GREM1/TGFB2/TGFB3/THBS1/ID2/SMAD7/TGFBR1/ACVR1	16
hsa00230	Purine metabolism	20/644	130/8039	0.00335613	0.0365702	0.0309422	PKM/NME7/ADSL/NT5E/PRPS1/ATIC/AK9/AK3/CANT1/NTPCR/AK7/PDE8A/GMPR/AK6/PDE3A/PAPSS2/PDE4B/NUDT5/NUDT2/PDE4D	20
hsa00983	Drug metabolism - other enzymes	14/644	79/8039	0.00366692	0.0386249	0.0326806	UPP1/MGST2/TYMP/NME7/GSTA3/GSTO2/GSTA4/GSTM2/GSTM3/GSTM1/GSTM4/GSTO1/CYP2E1/GSTT2	14
hsa05215	Prostate cancer	16/644	97/8039	0.004145	0.0413088	0.0349515	AR/PLAU/MMP3/ERG/TGFA/PIK3CD/CREB3L2/MMP9/AKT1/PIK3CB/PLAT/PDGFRB/PDGFC/CREB3L4/TP53/NRAS	16
hsa04218	Cellular senescence	23/644	160/8039	0.00418317	0.0413088	0.0349515	SERPINE1/CXCL8/HUS1/PIK3CD/ITPR2/CAPN2/SIRT1/IL1A/TSC1/RRAS2/AKT1/FOXO3/PIK3CB/TGFB2/TGFB3/IL6/TP53/ETS1/CDK6/TGFBR1/CCNA1/NRAS/GADD45A	23
hsa05219	Bladder cancer	9/644	41/8039	0.00438272	0.0419679	0.0355091	MMP1/CXCL8/TYMP/VEGFA/MMP9/RASSF1/THBS1/TP53/NRAS	9
hsa04640	Hematopoietic cell lineage	16/644	99/8039	0.00508905	0.0472983	0.0400192	KIT/IL4R/ITGA3/CD1A/IL1B/IL1A/ITGA6/IL6R/ITGAM/CD37/GP1BA/IL6/ITGA1/HLA-DQA1/MME/CD38	16

## Sheet: Supplementary Table 9
Supplementary Table 9. KEGG functional enrichment of genes in the module 23 relevant for AK in the GSE45216-98774 dataset
ID	Description	GeneRatio	BgRatio	pvalue	p.adjust	qvalue	gene	Count
hsa04978	Mineral absorption	7/18	58/8039	2.09596e-11	8.17425e-10	7.28071e-10	MT1HL1/MT2A/MT1G/MT1X/MT1H/MT1F/MT1E	7

## Sheet: Supplementary Table 10
Supplementary Table 10. Overrepresented GO terms in the module 9 relevant for normal tissue in the GSE45216-98774 dataset
ID	Description	GeneRatio	BgRatio	pvalue	p.adjust	qvalue	gene	Count
GO:0005044	scavenger receptor activity	9/282	47/18352	3.43676e-08	1.68401e-05	1.57006e-05	SCARA3/MARCO/SCARA5/COLEC12/LOXL4/ENPP1/ACKR4/PRG4/SSC5D	9
GO:0038024	cargo receptor activity	10/282	73/18352	1.65724e-07	4.06023e-05	3.78548e-05	SCARA3/MARCO/SCARA5/COLEC12/LOXL4/ENPP1/ACKR4/PRG4/SSC5D/FOLR2	10
GO:0005539	glycosaminoglycan binding	14/282	232/18352	1.50233e-05	0.0024538	0.00228775	DCN/PRELP/SOD3/LYVE1/SLIT2/LPL/VIT/CFH/SMOC2/LIPC/PCOLCE2/FBLN7/SUSD5/CCL23	14
GO:0050840	extracellular matrix binding	7/282	57/18352	2.57398e-05	0.00315313	0.00293976	DCN/CLEC14A/SLIT2/SMOC2/CD248/SSC5D/ELN	7
GO:0005201	extracellular matrix structural constituent	10/282	169/18352	0.000292701	0.023904	0.0222864	DCN/PRELP/COL28A1/MXRA5/EFEMP1/FBLN1/MMRN1/MFAP5/PRG4/ELN	10
GO:0008201	heparin binding	10/282	169/18352	0.000292701	0.023904	0.0222864	PRELP/SOD3/SLIT2/LPL/CFH/SMOC2/LIPC/PCOLCE2/FBLN7/CCL23	10

[truncated: 13 more sheets: Supplementary Table 11, Supplementary Table 12, Supplementary Table 13, Supplementary Table 14, Supplementary Table 15, Supplementary Table 16, Supplementary Table 17, Supplementary Table 18, Supplementary Table 19, Supplementary Table 20, Supplementary Table 21, Supplementary Table 22, Supplementary Table 23]
